# Supplementary material for: AirID, a novel proximity biotinylation enzyme, for analysis of protein–protein interactions
Source: eLife. 2020 May 11;9:e54983. doi: 10.7554/eLife.54983 (PMC7302878; doi:10.7554/eLife.54983)
Supplement: Figure 3—source data 1. — This excel file contains interaction analysis data from AlphaScreen used in Figure 3C. The graph in Figure 3C was generated using a ratio calculated on the basis of value subtracted background signal value. [file elife-54983-fig3-data1.xlsx]

## Sheet: Sheet1
AphaScreen data related to Figure 3C.
		Nutlin-3 (µM)
	NC	0	5	10	50
	632	174560	34168	12312	2296
	568	154752	31196	11356	1996
	580	152260	30604	11448	1956
	593.333
Nutlin-3 (µM)	0	5	10	50
	173980	33588	11732	1716
	154172	30616	10776	1416
	151680	30024	10868	1376
Average	159944	31409.3	11125.3	1502.67
Relative Average	1.05448	0.207076	0.0733474	0.00990682
