# Supplementary material for: AirID, a novel proximity biotinylation enzyme, for analysis of protein–protein interactions
Source: eLife. 2020 May 11;9:e54983. doi: 10.7554/eLife.54983 (PMC7302878; doi:10.7554/eLife.54983)
Supplement: Figure 4—figure supplement 2—source data 1. — This excel file contains viability analysis data obtained using a CellTiter-Glo Luminescent Cell Viability Assay (Promega) shown in Figure 4—figure supplement 2. The graph in Figure 4—figure supplement 2 was generated using a ratio calculated on the basis of value subtracted background signal value. [file elife-54983-fig4-figsupp2-data1.xlsx]

## Sheet: CellTiter-Glo
			CellTiter-Glo
Executed by:			PROMEGAPC\User
	Execution Date:		2020-04-03 03:21:06
Instrument:			GloMax® Discover
	Instrument Name:		PromegaInstrument
	Serial Number:		9700000470
	Firmware Ver:		4.92.0
	Software Ver:		3.1.0
Parameters:
	Plate Type:		96 well

## Sheet: Results
			Protocol: CellTiter-Glo
			Result: CellTiter-Glo 2020.04.03 03:21:05
Luminescence
	Emission Filter:		None
	Integration Time(s):		0.3
	Reading:		1		1	2	3	4	5	6	7	8	9	10	11	12
				A
				B
				C
				D
				E		2423000	2451000	2214000	2660000	1953000	2171000	2387000	1553000	1425000	49880
				F		3027000	3015000	3069000	3389000	2635000	2793000	2660000	1528000	1896000
				G		2909000	3179000	2952000	3461000	2932000	3119000	2920000	1867000	1934000
				H

## Sheet: Results By Well
			Protocol: CellTiter-Glo
			Result: CellTiter-Glo 2020.04.03 03:21:05
E:2			n	Time By Well (sec)	Time By Plate(s)	value	Part
	Luminescence		1	0	0	2423000
E:3			n	Time By Well (sec)	Time By Plate(s)	value	Part
	Luminescence		1	0	0.557	2451000
E:4			n	Time By Well (sec)	Time By Plate(s)	value	Part
	Luminescence		1	0	1.09	2214000
E:5			n	Time By Well (sec)	Time By Plate(s)	value	Part
	Luminescence		1	0	1.635	2660000
E:6			n	Time By Well (sec)	Time By Plate(s)	value	Part
	Luminescence		1	0	2.161	1953000
E:7			n	Time By Well (sec)	Time By Plate(s)	value	Part
	Luminescence		1	0	2.697	2171000
E:8			n	Time By Well (sec)	Time By Plate(s)	value	Part
	Luminescence		1	0	3.225	2387000
E:9			n	Time By Well (sec)	Time By Plate(s)	value	Part
	Luminescence		1	0	3.761	1553000
E:10			n	Time By Well (sec)	Time By Plate(s)	value	Part
	Luminescence		1	0	4.294	1425000
E:11			n	Time By Well (sec)	Time By Plate(s)	value	Part
	Luminescence		1	0	4.836	49880
F:2			n	Time By Well (sec)	Time By Plate(s)	value	Part
	Luminescence		1	0	6.125	3027000
F:3			n	Time By Well (sec)	Time By Plate(s)	value	Part
	Luminescence		1	0	6.668	3015000
F:4			n	Time By Well (sec)	Time By Plate(s)	value	Part
	Luminescence		1	0	7.209	3069000
F:5			n	Time By Well (sec)	Time By Plate(s)	value	Part
	Luminescence		1	0	7.748	3389000
F:6			n	Time By Well (sec)	Time By Plate(s)	value	Part
	Luminescence		1	0	8.291	2635000
F:7			n	Time By Well (sec)	Time By Plate(s)	value	Part
	Luminescence		1	0	8.823	2793000
F:8			n	Time By Well (sec)	Time By Plate(s)	value	Part
	Luminescence		1	0	9.366	2660000
F:9			n	Time By Well (sec)	Time By Plate(s)	value	Part
	Luminescence		1	0	9.904	1528000
F:10			n	Time By Well (sec)	Time By Plate(s)	value	Part
	Luminescence		1	0	10.436	1896000
G:2			n	Time By Well (sec)	Time By Plate(s)	value	Part
	Luminescence		1	0	11.637	2909000
G:3			n	Time By Well (sec)	Time By Plate(s)	value	Part
	Luminescence		1	0	12.174	3179000
G:4			n	Time By Well (sec)	Time By Plate(s)	value	Part
	Luminescence		1	0	12.722	2952000
G:5			n	Time By Well (sec)	Time By Plate(s)	value	Part
	Luminescence		1	0	13.253	3461000
G:6			n	Time By Well (sec)	Time By Plate(s)	value	Part
	Luminescence		1	0	13.798	2932000
G:7			n	Time By Well (sec)	Time By Plate(s)	value	Part
	Luminescence		1	0	14.321	3119000
G:8			n	Time By Well (sec)	Time By Plate(s)	value	Part
	Luminescence		1	0	14.861	2920000
G:9			n	Time By Well (sec)	Time By Plate(s)	value	Part
	Luminescence		1	0	15.402	1867000
G:10			n	Time By Well (sec)	Time By Plate(s)	value	Part
	Luminescence		1	0	15.939	1934000

## Sheet: Sheet1
Viability analysis data related to Figure 4—figure supplement 2.
	Mock		AirID		TurboId
	0	50	0	50	0	50
	2423000	2451000	2660000	1953000	2387000	1553000
	3027000	3015000	3389000	2635000	2660000	1528000
	2909000	3179000	3461000	2932000	2920000	1867000
Average	2.78633e+06	2.88167e+06	3170000	2.50667e+06	2.65567e+06	1.64933e+06
	Mock		AirID		TurboId
	0	50	0	50	0	50
	0.869602	0.879651	0.95466	0.700921	0.856681	0.557363
	1.08637	1.08207	1.21629	0.945687	0.95466	0.548391
	1.04402	1.14093	1.24213	1.05228	1.04797	0.670056
Relative Average	1	1.03421	1.1377	0.899629	0.953104	0.591937
