# Supplementary material for: AirID, a novel proximity biotinylation enzyme, for analysis of protein–protein interactions
Source: eLife. 2020 May 11;9:e54983. doi: 10.7554/eLife.54983 (PMC7302878; doi:10.7554/eLife.54983)
Supplement: Figure 4—source data 1. — This excel file contains cell growth analysis data obtained using the MTS assay shown in Figure 4E. Main signal (490 nm) and background signal (650 nm) were detected. The graph in Figure 4E was generated using a ratio calculated on the basis of value subtracted background signal value. [file elife-54983-fig4-data1.xlsx]

## Sheet: Sheet1
Cell growth analysis data related to Figure 4E.
	490 nm														650 nm
		biotin	Mock			AirID			AirID-IkBa			DMEM only												DMEM only
Days	0	–	0.6934	0.7003	0.6983	0.6308	0.6011	0.5998	0.6943	0.6856	0.6311	0.2277	0.2448	0.2424	0.1013	0.0991	0.098	0.0876	0.0837	0.0859	0.0937	0.0939	0.09	0.0485	0.0488	0.0508
		+	0.7581	0.8568	0.8861	0.7565	0.7187	0.7944	0.8052	0.8722	0.8046				0.1096	0.1305	0.1352	0.1161	0.105	0.1226	0.1201	0.1225	0.1197
	1	–	1.0692	1.0961	1.0842	1.062	1.0223	0.9791	1.0312	1.1123	1.051	0.1991	0.2184	0.2037	0.1408	0.1418	0.1531	0.1472	0.1423	0.1309	0.1453	0.1569	0.1518	0.0414	0.0452	0.0444
		+	1.2369	1.1029	1.088	1.0574	1.0097	1.1231	1.1467	1.1812	0.9798				0.1656	0.1432	0.14	0.1486	0.132	0.1566	0.1618	0.1691	0.1405
	2	–	1.6485	1.7086	1.7882	1.6979	1.8132	1.8215	1.6836	1.8378	1.6338	0.2068	0.211	0.2033	0.2869	0.2753	0.2823	0.2613	0.2858	0.2851	0.2713	0.3033	0.251	0.0431	0.0425	0.0426
		+	1.6305	1.7659	1.5877	1.8546	1.8289	1.7587	1.5889	1.68	1.7018				0.2913	0.2803	0.2431	0.2921	0.2917	0.2741	0.2472	0.2758	0.2662
	3	–	2.2919	2.1818	1.9913	1.7635	2.0595	1.8486	2.0971	1.8255	1.8197	0.2077	0.2075	0.2075	0.4006	0.3549	0.2987	0.2719	0.3221	0.3011	0.3363	0.3096	0.321	0.0435	0.0423	0.0443
		+	2.2317	2.083	2.149	2.1256	2.1957	2.2435	2.067	2.1198	2.3885				0.3768	0.3444	0.3688	0.3543	0.3746	0.3722	0.3332	0.3655	0.4258
	490 nm-650 nm
		biotin	Mock			AirID			AirID-IkBa			DMEM only			Average (DMEM only)
Days	0	–	0.5921	0.6012	0.6003	0.5432	0.5174	0.5139	0.6006	0.5917	0.5411	0.1792	0.196	0.1916	0.188933
		+	0.6485	0.7263	0.7509	0.6404	0.6137	0.6718	0.6851	0.7497	0.6849
	1	–	0.9284	0.9543	0.9311	0.9148	0.88	0.8482	0.8859	0.9554	0.8992	0.1577	0.1732	0.1593	0.1634
		+	1.0713	0.9597	0.948	0.9088	0.8777	0.9665	0.9849	1.0121	0.8393
	2	–	1.3616	1.4333	1.5059	1.4366	1.5274	1.5364	1.4123	1.5345	1.3828	0.1637	0.1685	0.1607	0.1643
		+	1.3392	1.4856	1.3446	1.5625	1.5372	1.4846	1.3417	1.4042	1.4356
	3	–	1.8913	1.8269	1.6926	1.4916	1.7374	1.5475	1.7608	1.5159	1.4987	0.1642	0.1652	0.1632	0.1642
		+	1.8549	1.7386	1.7802	1.7713	1.8211	1.8713	1.7338	1.7543	1.9627
	Target-background
		biotin	Mock			AirID			AirID-IkBa				biotin					biotin
Days	0	–	0.403167	0.412267	0.411367	0.354267	0.328467	0.324967	0.411667	0.402767	0.352167	0	–	0.408933	0.3359	0.388867	0	–	0.00501431	0.016002	0.0320931
		+	0.459567	0.537367	0.561967	0.451467	0.424767	0.482867	0.496167	0.560767	0.495967		+	0.519633	0.453033	0.517633		+	0.0534537	0.0290817	0.0373547
	1	–	0.765	0.7909	0.7677	0.7514	0.7166	0.6848	0.7225	0.792	0.7358	1	–	0.774533	0.7176	0.7501	1	–	0.0142381	0.0333113	0.0368908
		+	0.9079	0.7963	0.7846	0.7454	0.7143	0.8031	0.8215	0.8487	0.6759		+	0.8296	0.754267	0.782033		+	0.0680617	0.0450591	0.0929149
	2	–	1.1973	1.269	1.3416	1.2723	1.3631	1.3721	1.248	1.3702	1.2185	2	–	1.2693	1.33583	1.2789	2	–	0.0721505	0.0552052	0.0804321
		+	1.1749	1.3213	1.1803	1.3982	1.3729	1.3203	1.1774	1.2399	1.2713		+	1.2255	1.3638	1.22953		+	0.0830092	0.0397393	0.0478007
	3	–	1.7271	1.6627	1.5284	1.3274	1.5732	1.3833	1.5966	1.3517	1.3345	3	–	1.6394	1.42797	1.4276	3	–	0.101378	0.128844	0.146611
		+	1.6907	1.5744	1.616	1.6071	1.6569	1.7071	1.5696	1.5901	1.7985		+	1.62703	1.65703	1.65273		+	0.0589298	0.0500001	0.126653
	biotin	–			+				biotin	–			+
		Mock	AirID	AirID-IkBa	Mock	AirID	AirID-IkBa			Mock	AirID	AirID-IkBa	Mock	AirID	AirID-IkBa
Days	0	1	1	1	1	1	1	Days	0	0.0122619	0.0476391	0.0825299	0.102868	0.0641932	0.0721644
	1	1.89403	2.13635	1.92894	1.59651	1.66493	1.51079		1	0.0348176	0.0991702	0.0948674	0.13098	0.0994609	0.179499
	2	3.10393	3.97688	3.28879	2.35839	3.01037	2.3753		2	0.176436	0.16435	0.206837	0.0677349	0.0291386	0.0388771
	3	4.00897	4.25117	3.67118	3.13112	3.65764	3.19286		3	0.247909	0.383578	0.377021	0.113407	0.110367	0.244677
	biotin	–			+				biotin	–			+
		Mock	AirID	AirID-IkBa	Mock	AirID	AirID-IkBa			Mock	AirID	AirID-IkBa	Mock	AirID	AirID-IkBa
Days	0	1	0.821405	0.950929	1.2707	1.10784	1.26581	Days	0	0.0122619	0.039131	0.0784801	0.130715	0.0711159	0.0913467
	1	1.89403	1.75481	1.83428	2.02869	1.84447	1.91237		1	0.0348176	0.0814589	0.0902122	0.166437	0.110187	0.227213
	2	3.10393	3.26663	3.1274	2.99682	3.33502	3.00668		2	0.176436	0.134998	0.196688	0.202989	0.0971779	0.116891
	3	4.00897	3.49193	3.49103	3.97873	4.05209	4.04157		3	0.247909	0.315073	0.35852	0.144106	0.12227	0.309716
