# Supplementary material for: AirID, a novel proximity biotinylation enzyme, for analysis of protein–protein interactions
Source: eLife. 2020 May 11;9:e54983. doi: 10.7554/eLife.54983 (PMC7302878; doi:10.7554/eLife.54983)
Supplement: Figure 4—source data 2. — This excel file contains TNF-α mRNA level data using qRT-PCR in Figure 4D. mRNA levels of TNF-α and GAPDH were measured using qRT-PCR. The graph in Figure 4D was generated using a ratio calculated on the basis of ∆∆Ct method. [file elife-54983-fig4-data2.xlsx]

## Sheet: Sheet1
qRT-PCR data related to Figure 4D.
AirID	TNF							GAPDH
biotin	–			+			biotin	–			+
TNF (hr)	0	0.5	1	0	0.5	1	TNF (hr)	0	0.5	1	0	0.5	1
	34.56	33.99	27.66	38.93	32.34	27.32		15.22	15.14	15.39	15.25	15.08	15.29
	33.28	31.55	27.71	36.4	33.19	27.26		15.27	15.25	15.23	15.23	15.27	15.31
	37.2	32.11	27.42	34.79	33.49	27.47		15.18	15.04	15.2	15.23	15.13	15.36
AirID-IkBa	TNF							GAPDH
biotin	–			+			biotin	–			+
TNF (hr)	0	0.5	1	0	0.5	1	TNF (hr)	0	0.5	1	0	0.5	1
	39.25	31.41	27.67	34.48	33.48	27.56		15.41	15.27	15.31	15.28	15.15	15.36
	38.04	33.9	27.55	34.53	32.76	27.68		15.48	15.31	15.25	15.29	15.3	15.47
	32.66	32.41	27.8	34.25	33.45	27.78		15.22	15.16	15.25	15.23	15.34	15.24
AirID							AirID-IkBa
biotin	–			+			biotin	–			+
TNF (hr)	0	0.5	1	0	0.5	1	TNF (hr)	0	0.5	1	0	0.5	1
TNF-GAPDH	19.34	18.85	12.27	23.68	17.26	12.03	TNF-GAPDH	23.84	16.14	12.36	19.2	18.33	12.2
	18.01	16.3	12.48	21.17	17.92	11.95		22.56	18.59	12.3	19.24	17.46	12.21
	22.02	17.07	12.22	19.56	18.36	12.11		17.44	17.25	12.55	19.02	18.11	12.54
AirID							AirID-IkBa
biotin	–			+			biotin	–			+
TNF (hr)	0	0.5	1	0	0.5	1	TNF (hr)	0	0.5	1	0	0.5	1
	1.50688e-06	2.11634e-06	0.000202471	7.44063e-08	6.37122e-06	0.000239116		6.65955e-08	1.38476e-05	0.000190226	1.66044e-06	3.03473e-06	0.000212537
	3.78835e-06	1.2394e-05	0.000175043	4.23833e-07	4.0322e-06	0.00025275		1.6172e-07	2.53427e-06	0.000198304	1.61504e-06	5.54646e-06	0.000211069
	2.35136e-07	7.26805e-06	0.000209611	1.29376e-06	2.97228e-06	0.000226218		5.62389e-06	6.41553e-06	0.000166753	1.88109e-06	3.53465e-06	0.000167913
Average	1.84346e-06	7.25946e-06	0.000195708	5.97333e-07	4.45857e-06	0.000239361	Average	1.95074e-06	7.59915e-06	0.000185094	1.71886e-06	4.03862e-06	0.000197173
Relative Average	1	3.93796	106.164	0.324029	2.41859	129.844	Relative Average	1	3.89553	94.8843	0.881133	2.0703	101.076
