# Supplementary material for: AirID, a novel proximity biotinylation enzyme, for analysis of protein–protein interactions
Source: eLife. 2020 May 11;9:e54983. doi: 10.7554/eLife.54983 (PMC7302878; doi:10.7554/eLife.54983)
Supplement: Figure 6—source data 1. — This excel file contains data from mass spectrometry analyses using AirID-expressing cells. The graph in Figure 6B was generated using a logarithmic value of the abundance ratio and the p-value. [file elife-54983-fig6-data1.xlsx]

## Sheet: Sheet1
Mass spectrometry data related to Figure 6B.
Annotated Sequence	Modifications	Modifications in Master Proteins	# PSMs	Master Protein Accessions	Master Protein Descriptions	Positions in Master Proteins	# Missed Cleavages	Abundances: AirID_1	Abundances: AirID_2	Abundances: AirID_3	Abundances: AirID-IkBa_1	Abundances: AirID-IkBa_2	Abundances: AirID-IkBa_3	ratio (AirID-IkBa/AirID)	ratio (log2)	p value	p value rank	p value (-log10)	q value	q value (-log10)
[R].TYETFKSIMK.[K]	1xBiotin [K6]	Q04206 1xBiotin [K310]	3	Q04206	Transcription factor p65 OS=Homo sapiens OX=9606 GN=RELA PE=1 SV=2	Q04206 [305-314]	1	4.8	5.8	3.8	228	213.9	143.7	40.6667	5.34577	0.00187073	177	2.72799	0.00483007	2.31605
[K].GTVAVQEKAGLPR.[S]	1xBiotin [K8]	Q8NHV4 1xBiotin [K371]	3	Q8NHV4	Transcription factor p65 OS=Homo sapiens OX=9606 GN=RELA PE=1 SV=2	Q04206 [188-198]	1	3.5	6.9	5.6	229.2	183.6	171.2	36.5	5.18982	0.000429121	118	3.36742	0.00166194	2.77939
[R].APNTAELKICR.[V]	1xBiotin [K8]; 1xCarbamidomethyl [C10]	Q04206 1xBiotin [K195]	3	Q04206	Protein NEDD1 OS=Homo sapiens OX=9606 GN=NEDD1 PE=1 SV=1	Q8NHV4 [364-376]	1	4.4	5.3	9.7	225.2	173.8	181.7	29.933	4.90366	0.000310608	112	3.50779	0.00126739	2.89709
[K].KSPFSGPTDPRPPPR.[R]	1xBiotin [K1]	Q04206 1xBiotin [K315]	2	Q04206	Pyruvate carboxylase, mitochondrial OS=Homo sapiens OX=9606 GN=PC PE=1 SV=2	P11498 [1134-1158]	1	5.5	11.3	6.4	153.7	270.9	152.1	24.8578	4.63562	0.00940957	263	2.02643	0.0163505	1.78647
[K].GQPLCVLSAMKMETVVTSPMEGTVR.[K]	1xBiotin [K11]; 1xCarbamidomethyl [C5]; 2xOxidation [M12; M]	P11498 1xBiotin [K1144]	4	P11498	Transcription factor p65 OS=Homo sapiens OX=9606 GN=RELA PE=1 SV=2	Q04206 [315-329]	1	11.7	10.7	6.4	287.6	273.1	10.5	19.8333	4.30986	0.115126	360	0.938826	0.146146	0.835213
[R].TKLITPQVAK.[L]	1xBiotin [K2]	Q86TB9 1xBiotin [K460]	2	Q86TB9	Pyruvate carboxylase, mitochondrial OS=Homo sapiens OX=9606 GN=PC PE=1 SV=2	P11498 [1134-1158]	1	11.4	8.4	11.1	204.8	174.1	190.2	18.4175	4.203	3.60265e-05	44	4.44338	0.000374184	3.42691
[K].GQPLCVLSAMKMETVVTSPMEGTVR.[K]	1xBiotin [K11]; 1xCarbamidomethyl [C5]; 1xOxidation [M]	P11498 1xBiotin [K1144]	12	P11498	Protein PAT1 homolog 1 OS=Homo sapiens OX=9606 GN=PATL1 PE=1 SV=2	Q86TB9 [459-468]	1	11.8	8.1	13.8	273.2	230.6	62.4	16.8012	4.07049	0.05099	330	1.29251	0.0706134	1.15111
[K].NPTSSSEFYKAQGPLPNQHSLK.[G]	1xBiotin [K10]	Q4VCS5 1xBiotin [K219]	2	Q4VCS5	Angiomotin OS=Homo sapiens OX=9606 GN=AMOT PE=1 SV=1	Q4VCS5 [210-231]	1	12	14.6	14.9	280.3	192.2	86	13.4578	3.75037	0.0373796	312	1.42737	0.0547515	1.2616
[K].DSFKQLAK.[L]	1xBiotin [K4]	Q8NHV4 1xBiotin [K498]	1	Q8NHV4	Protein NEDD1 OS=Homo sapiens OX=9606 GN=NEDD1 PE=1 SV=1	Q8NHV4 [495-502]	1	19	12.8	16.4	210.1	173.2	168.4	11.4461	3.51678	0.000226703	98	3.64454	0.00105718	2.97585
[K].TPGPCAYQVVSPGVYK.[S]	1xBiotin [K16]; 1xCarbamidomethyl [C5]	A8MYP8 1xBiotin [K196]	2	A8MYP8	Outer dense fiber protein 3B OS=Homo sapiens OX=9606 GN=ODF3B PE=2 SV=1	A8MYP8 [181-196]	0	19	17.1	23.9	194.4	163.9	181.7	9	3.16993	6.07725e-05	61	4.21629	0.000455296	3.34171
[K].AENKGISPVVSEHR.[K]	1xBiotin [K4]	Q99700 1xBiotin [K781]	4	Q99700	Pyruvate carboxylase, mitochondrial OS=Homo sapiens OX=9606 GN=PC PE=1 SV=2	P11498 [1134-1158]	1	0.6	0.4	71.8	166.3	360	0.8	7.24038	2.85607	0.22806	397	0.641951	0.262527	0.580826
[K].GQPLCVLSAMKMETVVTSPMEGTVR.[K]	1xBiotin [K11]; 1xCarbamidomethyl [C5]	P11498 1xBiotin [K1144]	7	P11498	Eukaryotic translation initiation factor 4E transporter OS=Homo sapiens OX=9606 GN=EIF4ENIF1 PE=1 SV=2	Q9NRA8 [667-676]	1	18.9	24.8	36.5	270.5	171.8	77.5	6.4813	2.69628	0.0588858	341	1.22999	0.0789173	1.10283
[R].VTKSPAPVHR.[G]	1xBiotin [K3]	Q9NRA8 1xBiotin [K669]	6	Q9NRA8	E3 SUMO-protein ligase RanBP2 OS=Homo sapiens OX=9606 GN=RANBP2 PE=1 SV=2	P49792 [1523-1533]	1	25.9	25.3	29.1	184.3	177.3	158.1	6.47198	2.69421	5.03167e-05	55	4.29829	0.000418086	3.37873
[K].FGTSETSKTLK.[S]	1xBiotin [K8]	P49792 1xBiotin [K1530]	4	P49792	Aryl hydrocarbon receptor nuclear translocator OS=Homo sapiens OX=9606 GN=ARNT PE=1 SV=1	P27540 [236-245]	1	34.7	21.6	29.3	185.5	166.5	162.5	6.01051	2.58749	5.90184e-05	58	4.22901	0.000465025	3.33252
[K].TAASAPANVSKGTTPLAPPPKPVR.[R]	1xBiotin [K11]	Q96D71 1xBiotin [K691]	32	Q96D71	RalBP1-associated Eps domain-containing protein 1 OS=Homo sapiens OX=9606 GN=REPS1 PE=1 SV=3	Q96D71 [681-704]	1	22.5	33	40.4	176.4	159.4	168.3	5.25652	2.39411	4.48242e-05	51	4.34849	0.00040166	3.39614
[R].ILDLKTGTVK.[K]	1xBiotin [K5]	P27540 1xBiotin [K240]	3	P27540	Ataxin-2 OS=Homo sapiens OX=9606 GN=ATXN2 PE=1 SV=2	Q99700 [778-791]	1	40.5	25.2	30.3	182.3	133.9	187.8	5.25	2.39232	0.00154455	170	2.8112	0.0041521	2.38173
[K].KFVPDYYK.[MV]	1xBiotin [K1]	Q8IZX4 1xBiotin [K1554]	6	Q8IZX4	E3 SUMO-protein ligase RanBP2 OS=Homo sapiens OX=9606 GN=RANBP2 PE=1 SV=2	P49792 [1849-1860]	1	39.1	36.5	39.9	183.5	155.2	146	4.19654	2.0692	0.000407752	116	3.3896	0.0016064	2.79415
[K].ASKFGNTEQGFK.[F]	1xBiotin [K3]	P49792 1xBiotin [K1851]	2	P49792	DnaJ homolog subfamily B member 1 OS=Homo sapiens OX=9606 GN=DNAJB1 PE=1 SV=4	P25685 [190-198]	1	20.7	40.3	58.5	206.5	102.2	171.8	4.02092	2.00753	0.0208924	295	1.68001	0.0323655	1.48992
[R].NGHLQSESGAVPKR.[K]	1xBiotin [K13]	Q9UBP0 1xBiotin [K234]	1	Q9UBP0	Spastin OS=Homo sapiens OX=9606 GN=SPAST PE=1 SV=1	Q9UBP0 [222-235]	1	34.1	63.9	26.4	129.3	138.7	207.7	3.82395	1.93507	0.0126464	279	1.89803	0.0207147	1.68372
[R].ISRPHPSTAESKAPTPK.[F]	1xBiotin [K12]	Q71RC2 1xBiotin [K471]	18	Q71RC2	Transcription initiation factor TFIID subunit 1-like OS=Homo sapiens OX=9606 GN=TAF1L PE=1 SV=1	Q8IZX4 [1554-1561]	1	35.6	41.9	49.4	158.5	162.9	151.8	3.72892	1.89876	2.31125e-05	34	4.63615	0.000310659	3.50772
[K].GKGPLPMEAIEK.[M]	1xBiotin [K2]	Q6P1N0 1xBiotin [K65]	10	Q6P1N0	La-related protein 4 OS=Homo sapiens OX=9606 GN=LARP4 PE=1 SV=3	Q71RC2 [460-476]	1	34.3	40.3	52.4	194.6	150.8	127.6	3.72441	1.89701	0.00478174	235	2.32041	0.00929896	2.03157
[K].GFNKVVLK.[H]	1xBiotin [K4]	P78527 1xBiotin [K828]	1	P78527	DNA-dependent protein kinase catalytic subunit OS=Homo sapiens OX=9606 GN=PRKDC PE=1 SV=3	P78527 [825-832]	1	41.7	41.6	44.6	159.9	156.7	155.5	3.69116	1.88408	2.50624e-07	1	6.60098	0.000114535	3.94106
[R].ASEKGPALK.[A]	1xBiotin [K4]	P42356 1xBiotin [K754]	3	P42356	Coiled-coil and C2 domain-containing protein 1A OS=Homo sapiens OX=9606 GN=CC2D1A PE=1 SV=1	Q6P1N0 [64-75]	1	9.4	65.2	58.7	145.5	157.7	163.5	3.50113	1.80782	0.00378802	220	2.42159	0.00786874	2.10409
[M].SGPTWLPPKQPEPAR.[A]	1xAcetyl [N-Term]; 1xBiotin [K9]	Q15654 1xAcetyl [N-Term]; 1xBiotin [K10]	2	Q15654	Thyroid receptor-interacting protein 6 OS=Homo sapiens OX=9606 GN=TRIP6 PE=1 SV=3	Q15654 [2-16]	1	37.6	46.4	52.6	201.4	123.9	138.2	3.39312	1.76261	0.0108074	270	1.96628	0.0182925	1.73773
[K].STKTINPSK.[Y]	1xBiotin [K3]	P42338 1xBiotin [K418]	6	P42338	E3 SUMO-protein ligase RanBP2 OS=Homo sapiens OX=9606 GN=RANBP2 PE=1 SV=2	P49792 [2179-2190]	1	46.1	47.3	47.4	178.9	136	144.3	3.26136	1.70548	0.00127779	163	2.89354	0.00358251	2.44581
[K].DFKTFLTNDQTK.[V]	1xBiotin [K3]	P49792 1xBiotin [K2181]	2	P49792	Cytoplasmic dynein 1 light intermediate chain 1 OS=Homo sapiens OX=9606 GN=DYNC1LI1 PE=1 SV=3	Q9Y6G9 [412-429]	1	57.2	42.4	43	180.9	179.3	97.1	3.20687	1.68117	0.0202189	291	1.69424	0.0317527	1.49822
[R].SVSSNVASVSPIPAGSKK.[I]	1xBiotin [K18]	Q9Y6G9 1xBiotin [K429]	8	Q9Y6G9	Phosphatidylinositol 4,5-bisphosphate 3-kinase catalytic subunit beta isoform OS=Homo sapiens OX=9606 GN=PIK3CB PE=1 SV=1	P42338 [416-424]	1	54.1	49.3	42.9	171.1	126	156.6	3.10116	1.63281	0.00170062	174	2.76939	0.00446658	2.35002
[K].IKSASPCIADK.[I]	1xBiotin [K2]; 1xCarbamidomethyl [C7]	Q05209 1xBiotin [K465]	6	Q05209	Bcl-2-associated transcription factor 1 OS=Homo sapiens OX=9606 GN=BCLAF1 PE=1 SV=2	Q9NYF8 [300-312]	1	48.7	52.4	51.8	208.8	156.2	82	2.92348	1.54769	0.0561523	338	1.25063	0.0759219	1.11963
[R].TVPQYKYAAGVR.[N]	1xBiotin [K6]	P11940 1xBiotin [K512]	13	P11940	Tyrosine-protein phosphatase non-receptor type 12 OS=Homo sapiens OX=9606 GN=PTPN12 PE=1 SV=3	Q05209 [464-474]	1	41.4	60.8	52.4	179.8	134.5	131	2.88034	1.52624	0.00437799	229	2.35873	0.00873686	2.05864
[R].YAPDKTSTVLTR.[H]	1xBiotin [K5]	Q9NR12 1xBiotin [K238]	4	Q9NR12	Polyadenylate-binding protein 1 OS=Homo sapiens OX=9606 GN=PABPC1 PE=1 SV=2	P11940 [507-518]	1	52.6	57.7	55.8	170	146	117.8	2.61168	1.38498	0.00416291	224	2.3806	0.00849308	2.07093
[-].MKIEEVK.[S]	1xAcetyl [N-Term]; 1xBiotin [K2]	Q9Y265 1xAcetyl [N-Term]; 1xBiotin [K2]	6	Q9Y265	Fatty acid synthase OS=Homo sapiens OX=9606 GN=FASN PE=1 SV=3	P49327 [1152-1171]	1	57.5	58.1	51.9	176	126.6	129.9	2.58209	1.36854	0.00533568	240	2.27281	0.01016	1.99311
[R].LNPDGKSIR.[N]	1xBiotin [K6]	P25685 1xBiotin [K195]	3	P25685	Phosphatidylinositol 4-kinase alpha OS=Homo sapiens OX=9606 GN=PI4KA PE=1 SV=4	P42356 [751-759]	1	13.5	34.7	122	116.1	170.9	142.8	2.52526	1.33643	0.0782764	352	1.10637	0.101626	0.992996
[K].VTQQGLKMVVPGLDGAQIPR.[D]	1xBiotin [K7]; 1xOxidation [M8]	P49327 1xBiotin [K1158]	2	P49327	PDZ and LIM domain protein 7 OS=Homo sapiens OX=9606 GN=PDLIM7 PE=1 SV=1	Q9NR12 [234-245]	1	70.1	42.5	69.9	212.1	193.5	11.9	2.28767	1.19388	0.29145	404	0.535435	0.329685	0.4819
[-].MKIEEVK.[S]	1xAcetyl [N-Term]; 1xBiotin [K2]; 1xOxidation [M1]	Q9Y265 1xAcetyl [N-Term]; 1xBiotin [K2]	1	Q9Y265	RuvB-like 1 OS=Homo sapiens OX=9606 GN=RUVBL1 PE=1 SV=1	Q9Y265 [1-7]	1	66.7	59.3	57.2	125.9	197.7	93.2	2.27511	1.18594	0.0659093	346	1.18105	0.0870536	1.06021
[K].VTQQGLKMVVPGLDGAQIPR.[D]	1xBiotin [K7]	P49327 1xBiotin [K1158]	4	P49327	Ataxin-2-like protein OS=Homo sapiens OX=9606 GN=ATXN2L PE=1 SV=2	Q8WWM7 [346-355]	1	9.6	85.5	92.5	187.1	210.7	14.6	2.19829	1.13638	0.327721	408	0.484495	0.36708	0.435239
[R].EGKYIPLPQR.[V]	1xBiotin [K3]	Q8WWM7 1xBiotin [K348]	5	Q8WWM7	Filamin-A OS=Homo sapiens OX=9606 GN=FLNA PE=1 SV=4	P21333 [907-921]	1	81	53.2	62	139.5	143.7	120.5	2.05759	1.04096	0.00313083	210	2.50434	0.00681327	2.16664
[K].ANKTPLRPLDPTR.[L]	1xBiotin [K3]	Q04637 1xBiotin [K646]	2	Q04637	Fatty acid synthase OS=Homo sapiens OX=9606 GN=FASN PE=1 SV=3	P49327 [1152-1171]	1	62.8	57.1	77.8	130	151.4	120.9	2.0349	1.02496	0.00338087	214	2.47097	0.00721989	2.14147
[M].SSDEKGISPAHK.[T]	1xAcetyl [N-Term]; 1xBiotin [K5]	Q9BZF3 1xAcetyl [N-Term]; 1xBiotin [K6]	8	Q9BZF3	RuvB-like 1 OS=Homo sapiens OX=9606 GN=RUVBL1 PE=1 SV=1	Q9Y265 [1-7]	1	74.8	67.5	58	147	130.8	121.9	1.99551	0.996755	0.00165431	173	2.78138	0.00437005	2.35951
[K].LDVQFSGLTKGDAVR.[D]	1xBiotin [K10]	P21333 1xBiotin [K916]	6	P21333	Eukaryotic translation initiation factor 4 gamma 1 OS=Homo sapiens OX=9606 GN=EIF4G1 PE=1 SV=4	Q04637 [644-656]	1	60.8	58	82.4	180	184	34.8	1.98211	0.987035	0.255562	400	0.592504	0.291979	0.534648
[R].IKTSDVTSTK.[G]	1xBiotin [K2]	P26196 1xBiotin [K86]	3	P26196	Probable ATP-dependent RNA helicase DDX6 OS=Homo sapiens OX=9606 GN=DDX6 PE=1 SV=2	P26196 [85-94]	1	69	70.4	64.4	158.6	137.1	100.6	1.94455	0.959439	0.0196239	289	1.70722	0.0310315	1.5082
[R].KAASLTEDRDR.[G]	1xBiotin [K1]	Q04637 1xBiotin [K1206]	7	Q04637	Oxysterol-binding protein-related protein 6 OS=Homo sapiens OX=9606 GN=OSBPL6 PE=1 SV=1	Q9BZF3 [2-13]	1	67.3	73	66.8	132.2	134.4	126.3	1.89715	0.923835	3.85247e-05	47	4.41426	0.000374592	3.42644
[M].SAAVTAGKLAR.[A]	1xAcetyl [N-Term]; 1xBiotin [K8]	P53350 1xAcetyl [N-Term]; 1xBiotin [K9]	5	P53350	Eukaryotic translation initiation factor 4 gamma 1 OS=Homo sapiens OX=9606 GN=EIF4G1 PE=1 SV=4	Q04637 [1206-1216]	2	79.2	62.5	73.4	124.1	138.6	122.3	1.78987	0.839851	0.0013476	165	2.87044	0.00373243	2.42801
[R].TSPALKTTR.[L]	1xBiotin [K6]	Q5SW79 1xBiotin [K1264]	2	Q5SW79	Serine/threonine-protein kinase PLK1 OS=Homo sapiens OX=9606 GN=PLK1 PE=1 SV=1	P53350 [2-12]	1	76.5	80.5	67.7	127.8	138.2	109.3	1.67023	0.740044	0.00560902	241	2.25111	0.0106362	1.97321
[K].SPFLPSMKMQK.[V]	1xBiotin [K8]	Q8NFD5 1xBiotin [K1566]	1	Q8NFD5	Centrosomal protein of 170 kDa OS=Homo sapiens OX=9606 GN=CEP170 PE=1 SV=1	Q5SW79 [1259-1267]	1	66	77	83.4	180.8	125.2	67.6	1.65018	0.72262	0.212067	392	0.673528	0.247231	0.606897
[R].QDKCALGWDHQEK.[L]	1xBiotin [K3]; 1xCarbamidomethyl [C4]	Q14247 1xBiotin [K245]	1	Q14247	Vesicle-associated membrane protein-associated protein B/C OS=Homo sapiens OX=9606 GN=VAPB PE=1 SV=3	O95292 [140-155]	1	71	64.6	92	133.4	135.8	103.2	1.6362	0.710353	0.0225063	299	1.6477	0.0343993	1.46345
[K].VDKSAVGFEYQGK.[T]	1xBiotin [K3]	Q14247 1xBiotin [K208]	4	Q14247	Src substrate cortactin OS=Homo sapiens OX=9606 GN=CTTN PE=1 SV=2	Q14247 [206-218]	1	85.4	66.3	76.2	139	114.8	118.3	1.63273	0.707289	0.00678923	249	2.16818	0.0124606	1.90446
[K].IISTTASKTETPIVSK.[S]	1xBiotin [K8]	O95292 1xBiotin [K147]	7	O95292	AT-rich interactive domain-containing protein 1B OS=Homo sapiens OX=9606 GN=ARID1B PE=1 SV=2	Q8NFD5 [1559-1569]	1	83	76.3	71.6	135.2	116.5	117.5	1.59896	0.677134	0.00263162	199	2.57978	0.00604347	2.21871
[R].TCPVMSGGPKYEYR.[W]	1xBiotin [K10]; 1xCarbamidomethyl [C2]	Q86TA1 1xBiotin [K95]	2	Q86TA1	RuvB-like 1 OS=Homo sapiens OX=9606 GN=RUVBL1 PE=1 SV=1	Q9Y265 [1-7]	1	76.2	77.9	78.6	122	136.5	108.6	1.57757	0.657702	0.00519268	239	2.28461	0.00992909	2.00309
[-].MKIEEVK.[S]	1xBiotin [K2]	Q9Y265 1xBiotin [K2]	6	Q9Y265	Src substrate cortactin OS=Homo sapiens OX=9606 GN=CTTN PE=1 SV=2	Q14247 [243-255]	1	67	79	88.9	143.6	111.1	110.5	1.5547	0.63664	0.0263568	305	1.57911	0.0394919	1.40349
[K].ESFGGQGTKGK.[D]	1xBiotin [K9]	A4D1P6 1xBiotin [K300]	3	A4D1P6	MOB kinase activator 3B OS=Homo sapiens OX=9606 GN=MOB3B PE=1 SV=2	Q86TA1 [86-99]	1	76.4	80.5	78.8	144.4	117.4	102.5	1.54561	0.628175	0.0253649	302	1.59577	0.0383833	1.41586
[K].TAGNSEFLGKTPGQNAQK.[W]	1xBiotin [K10]	P78344 1xBiotin [K41]	2	P78344	Eukaryotic translation initiation factor 4 gamma 2 OS=Homo sapiens OX=9606 GN=EIF4G2 PE=1 SV=1	P78344 [32-49]	1	68.7	74.3	92.8	110.7	139.9	113.5	1.54411	0.626771	0.0223514	298	1.6507	0.0342771	1.465
[K].AYEIEKR.[L]	1xBiotin [K6]	Q9UPP1 1xBiotin [K387]	9	Q9UPP1	SH3 and PX domain-containing protein 2B OS=Homo sapiens OX=9606 GN=SH3PXD2B PE=1 SV=3	A1X283 [728-741]	1	85.9	74.8	76	139.2	111.5	112.6	1.53485	0.618102	0.0122147	277	1.91312	0.020152	1.69568
[R].APPRPAKTTDPVSK.[S]	1xBiotin [K7]	A1X283 1xBiotin [K734]	5	A1X283	Chromosome alignment-maintaining phosphoprotein 1 OS=Homo sapiens OX=9606 GN=CHAMP1 PE=1 SV=2	Q96JM3 [527-536]	0	64.4	81	91.7	139.3	118.5	105	1.53016	0.613679	0.0303309	308	1.51811	0.045004	1.34675
[K].AYDKAVASFK.[H]	1xBiotin [K4]	Q16637 1xBiotin [K45]	6	Q16637	PDZ and LIM domain protein 5 OS=Homo sapiens OX=9606 GN=PDLIM5 PE=1 SV=5	Q96HC4 [408-416]	1	88.1	75.3	76.6	130.6	118.1	111.4	1.50042	0.585363	0.00448852	231	2.3479	0.00887988	2.05159
[R].VDKSAVGFDYQGK.[T]	1xBiotin [K3]	Q14247 1xBiotin [K171]	7	Q14247	Histone lysine demethylase PHF8 OS=Homo sapiens OX=9606 GN=PHF8 PE=1 SV=3	Q9UPP1 [382-388]	1	81.8	81.3	77.1	136.1	115.8	107.9	1.49792	0.582959	0.00949241	264	2.02262	0.0164319	1.78431
[R].NVMILTNPVAAKK.[N]	1xBiotin [K]	Q9UGI8 1xBiotin [K]	5	Q9UGI8	WD repeat-containing protein 91 OS=Homo sapiens OX=9606 GN=WDR91 PE=1 SV=2	A4D1P6 [292-302]	1	77.5	83.2	82.5	136.8	111	109	1.46711	0.552972	0.0142898	283	1.84497	0.0230758	1.63684
[R].AEHIPAGKR.[T]	1xBiotin [K8]	Q96HC4 1xBiotin [K415]	3	Q96HC4	Survival motor neuron protein OS=Homo sapiens OX=9606 GN=SMN1 PE=1 SV=1	Q16637 [42-51]	1	80.5	77.2	88.1	127.6	131.9	94.8	1.44142	0.527487	0.0408955	317	1.38832	0.0589566	1.22947
[K].TGFGGKFGVQSER.[Q]	1xBiotin [K6]	Q14247 1xBiotin [K272]	3	Q14247	Src substrate cortactin OS=Homo sapiens OX=9606 GN=CTTN PE=1 SV=2	Q14247 [267-279]	1	91.4	72.4	82.2	119.5	119.5	115	1.43902	0.525091	0.00318787	211	2.4965	0.00690454	2.16087
[R].KPALFPEPAK.[T]	1xBiotin [K1]	Q96JM3 1xBiotin [K527]	2	Q96JM3	Calmodulin-regulated spectrin-associated protein 1 OS=Homo sapiens OX=9606 GN=CAMSAP1 PE=1 SV=2	Q5T5Y3 [348-356]	1	83.2	79.5	85.1	125.4	177.9	48.9	1.42131	0.507219	0.405814	424	0.391673	0.437398	0.359123
[K].GFGGKFGVQTDR.[Q]	1xBiotin [K5]	Q14247 1xBiotin [K235]	3	Q14247	Src substrate cortactin OS=Homo sapiens OX=9606 GN=CTTN PE=1 SV=2	Q14247 [169-181]	1	87.2	78.6	83.9	99.4	131.8	119.1	1.40288	0.488395	0.0263333	303	1.57949	0.0397172	1.40102
[R].RPEPKPDKSR.[L]	1xBiotin [K8]	A1X283 1xBiotin [K584]	3	A1X283	RuvB-like 1 OS=Homo sapiens OX=9606 GN=RUVBL1 PE=1 SV=1	Q9Y265 [1-7]	1	69.5	84.5	96.1	149.7	116.9	83.2	1.39864	0.484025	0.183392	384	0.736618	0.218256	0.661033
[K].DAKTVLHQK.[S]	1xBiotin [K3]	Q5T5Y3 1xBiotin [K350]	4	Q5T5Y3	SHC-transforming protein 1 OS=Homo sapiens OX=9606 GN=SHC1 PE=1 SV=4	P29353 [318-328]	1	70.5	100.1	81.8	131.4	143.6	72.6	1.37718	0.461716	0.249152	398	0.603535	0.286087	0.543502
[K].VTINNKVILLK.[K]	1xBiotin [K6]	Q8TEQ6 1xBiotin [K823]	1	Q8TEQ6	Src substrate cortactin OS=Homo sapiens OX=9606 GN=CTTN PE=1 SV=2	Q14247 [231-242]	1	92.5	86.1	75.5	145.8	113.1	87	1.36128	0.444959	0.159217	373	0.79801	0.195073	0.709802
[R].KGTQPSTAR.[R]	1xBiotin [K1]	Q9NTJ3 1xBiotin [K4]	7	Q9NTJ3	Testin OS=Homo sapiens OX=9606 GN=TES PE=1 SV=1	Q9UGI8 [90-102]	1	84.5	92	77.7	124.4	96.1	125.3	1.36035	0.443974	0.043025	321	1.36628	0.0612537	1.21287
[QK].SAVGFEYQGKTEK.[H]	1xBiotin [K]	Q14247 1xBiotin [K]; 1xBiotin [K]	5	Q14247	Protein scribble homolog OS=Homo sapiens OX=9606 GN=SCRIB PE=1 SV=4	Q14160 [1260-1269]	1	91	77.1	87.8	136.3	98.2	109.6	1.34467	0.427248	0.0711765	349	1.14766	0.0932025	1.03057
[R].NPPKLVTPHDR.[M]	1xBiotin [K4]	P29353 1xBiotin [K321]	7	P29353	SH3 and PX domain-containing protein 2B OS=Homo sapiens OX=9606 GN=SH3PXD2B PE=1 SV=3	A1X283 [577-586]	1	103.7	79	73.6	115.9	123.3	104.5	1.34101	0.423316	0.0536518	335	1.27042	0.0731907	1.13554
[K].DYSSGFGGKYGVQADR.[V]	1xBiotin [K9]	Q14247 1xBiotin [K161]	4	Q14247	Structural maintenance of chromosomes protein 4 OS=Homo sapiens OX=9606 GN=SMC4 PE=1 SV=2	Q9NTJ3 [4-12]	1	85.6	76.1	97.8	125.9	115.8	98.8	1.31214	0.39192	0.0555837	336	1.25505	0.0756005	1.12148
[K].FQKTSTGAVR.[M]	1xBiotin [K3]	Q6P158 1xBiotin [K1237]	8	Q6P158	Gem-associated protein 5 OS=Homo sapiens OX=9606 GN=GEMIN5 PE=1 SV=3	Q8TEQ6 [818-828]	1	97.8	88	73.7	114.4	114.1	111.9	1.31175	0.391496	0.0186243	285	1.72992	0.0298643	1.52485
[K].LSKHCSQVDSVR.[G]	1xBiotin [K3]; 1xCarbamidomethyl [C5]	Q14247 1xBiotin [K110]	5	Q14247	Src substrate cortactin OS=Homo sapiens OX=9606 GN=CTTN PE=1 SV=2	Q14247 [153-168]	1	81	95.5	83.5	144.2	101.3	94.5	1.30769	0.387023	0.174851	380	0.757332	0.210281	0.6772
[-].MKIEEVK.[S]	1xBiotin [K2]; 1xOxidation [M1]	Q9Y265 1xBiotin [K2]	2	Q9Y265	Putative ATP-dependent RNA helicase DHX57 OS=Homo sapiens OX=9606 GN=DHX57 PE=1 SV=2	Q6P158 [1235-1244]	1	105.3	78.5	78.9	112.8	111.7	112.8	1.28397	0.360616	0.0487182	326	1.31231	0.0682951	1.16561
[R].GLQPLKLDYR.[A]	1xBiotin [K6]	Q14160 1xBiotin [K1265]	3	Q14160	Centrosomal protein of 170 kDa OS=Homo sapiens OX=9606 GN=CEP170 PE=1 SV=1	Q5SW79 [712-729]	1	89.2	86.7	88.4	139	122.5	74.2	1.27015	0.344996	0.288372	403	0.540047	0.327012	0.485436
[K].SAVGFDYQGKTEK.[H]	1xBiotin [K10]	Q14247 1xBiotin [K181]	5	Q14247	Filamin-A OS=Homo sapiens OX=9606 GN=FLNA PE=1 SV=4	P21333 [905-921]	2	102.7	83.7	85.4	116.1	106.7	105.5	1.20787	0.272469	0.0531924	334	1.27415	0.0727812	1.13798
[K].KVVLVDGK.[T]	1xBiotin [K1]	Q92625 1xBiotin [K465]	1	Q92625	Src substrate cortactin OS=Homo sapiens OX=9606 GN=CTTN PE=1 SV=2	Q14247 [135-147]; [209-221]	1	90.7	87.5	95.2	120.3	114.7	91.7	1.19495	0.256953	0.120546	362	0.918848	0.152181	0.817641
[R].GPTGQKVVR.[F]	1xBiotin [K6]	Q9H425 1xBiotin [K104]	3	Q9H425	Ankyrin repeat and SAM domain-containing protein 1A OS=Homo sapiens OX=9606 GN=ANKS1A PE=1 SV=4	Q92625 [465-472]	1	90.7	90.3	93.2	131.3	103.3	91.2	1.18818	0.248758	0.222189	394	0.653278	0.257716	0.588858
[K].AGEKSLNGAVPLGSNAR.[E]	1xBiotin [K4]	Q9H2P0 1xBiotin [K203]	2	Q9H2P0	Src substrate cortactin OS=Homo sapiens OX=9606 GN=CTTN PE=1 SV=2	Q14247 [172-184]	1	112.4	79.7	93.8	95.5	103.1	115.5	1.09864	0.135713	0.445511	432	0.351141	0.471293	0.326709
[K].GSSLKIEER.[A]	1xBiotin [K5]	Q05682 1xBiotin [K645]	7	Q05682	Src substrate cortactin OS=Homo sapiens OX=9606 GN=CTTN PE=1 SV=2	Q14247 [108-119]	1	88.1	93.6	106	117.1	99.5	95.7	1.08551	0.118367	0.387014	420	0.412273	0.421108	0.375606
[R].RPDQQLQGEGKIIDR.[R]	1xBiotin [K11]	Q8NC51 1xBiotin [K122]	16	Q8NC51	MAP/microtubule affinity-regulating kinase 3 OS=Homo sapiens OX=9606 GN=MARK3 PE=1 SV=5	P27448 [455-480]	1	106.5	88	99.7	101.6	106	98.2	1.03943	0.0557912	0.545113	437	0.263514	0.570061	0.244079
[K].DKDAYSSFGSR.[SD]	1xBiotin [K2]	O00571 1xBiotin [K66]	2	O00571	Uncharacterized protein C1orf198 OS=Homo sapiens OX=9606 GN=C1orf198 PE=1 SV=1	Q9H425 [99-107]	1	119.7	92.2	85.1	80.2	115.4	107.4	1.0202	0.0288549	0.900328	451	0.0455991	0.912306	0.0398594
[K].QMKLCVQNSHQEAR.[N]	1xBiotin [K3]; 1xCarbamidomethyl [C5]	Q9H0L4 1xBiotin [K148]	1	Q9H0L4	Activity-dependent neuroprotector homeobox protein OS=Homo sapiens OX=9606 GN=ADNP PE=1 SV=1	Q9H2P0 [200-216]	1	22.7	140	134.5	117.4	53.1	132.4	1.01918	0.0274075	0.968554	454	0.0138761	0.974954	0.0110157
[R].SSDKPIR.[T]	1xBiotin [K4]	Q99961 1xBiotin [K294]	3	Q99961	Heterogeneous nuclear ribonucleoprotein A1 OS=Homo sapiens OX=9606 GN=HNRNPA1 PE=1 SV=5	P09651 [2-14]	2	106.7	99	91.6	111.3	108.3	83	1.01783	0.0254925	0.868066	450	0.0614471	0.88157	0.0547434
[R].GPPASSPAPAPKFSPVTPK.[F]	1xBiotin [K12]	Q15942 1xBiotin [K265]	5	Q15942	Caldesmon OS=Homo sapiens OX=9606 GN=CALD1 PE=1 SV=3	Q05682 [641-649]	1	134.5	82.8	80.6	83.5	122	96.5	1.01376	0.0197204	0.951068	452	0.0217882	0.961589	0.0170105
[K].TGGDNKTLLHLGSSAPGK.[E]	1xBiotin [K6]	Q5SW79 1xBiotin [K717]	3	Q5SW79	Endophilin-A2 OS=Homo sapiens OX=9606 GN=SH3GL1 PE=1 SV=1	Q99961 [291-297]	0	109.1	84.9	104.9	141.1	23.4	136.7	1.00769	0.0110589	0.985347	457	0.00641084	0.985347	0.00641084
[K].FGQGFGKTNIYTQK.[Q]	1xBiotin [K7]	Q9H5V9 1xBiotin [K128]	9	Q9H5V9	Zyxin OS=Homo sapiens OX=9606 GN=ZYX PE=1 SV=1	Q15942 [254-272]	1	117.3	82.8	100.8	117.3	117.8	64.1	0.99435	-0.00817393	0.979184	456	0.00913586	0.981331	0.0081845
[K].GKLDVQFSGLTKGDAVR.[D]	1xBiotin [K12]	P21333 1xBiotin [K916]	5	P21333	Src substrate cortactin OS=Homo sapiens OX=9606 GN=CTTN PE=1 SV=2	Q14247 [95-107]	1	94.2	92.4	115.1	121.3	161.7	15.2	0.988399	-0.0168344	0.980246	455	0.00866485	0.984555	0.00676004
[R].SITVNDLTHLLEAAEK.[A]	1xBiotin [K16]	Q8IVG5 1xBiotin [K1158]	2	Q8IVG5	Plasminogen activator inhibitor 1 RNA-binding protein OS=Homo sapiens OX=9606 GN=SERBP1 PE=1 SV=2	Q8NC51 [112-126]	1	100.4	85.4	117.4	97.8	174.7	24.3	0.978892	-0.0307787	0.963976	453	0.0159338	0.972488	0.0121158
[R].GQGEKSATPSR.[K]	1xBiotin [K5]	P46060 1xBiotin [K406]	16	P46060	Histone H2B type 2-E OS=Homo sapiens OX=9606 GN=HIST2H2BE PE=1 SV=3 Histone H2B type 2-F OS=Homo sapiens OX=9606 GN=HIST2H2BF PE=1 SV=3 Histone H2B type 1-D OS=Homo sapiens OX=9606 GN=HIST1H2BD PE=1 SV=2	Q16778 [81-87]; Q5QNW6 [81-87]; P58876 [81-87]	1	99.1	117.3	94	116.2	84.7	88.6	0.932668	-0.100565	0.597883	442	0.223384	0.618173	0.20889
[K].NKSAFPFSDK.[L]	1xBiotin [K2]	Q14677 1xBiotin [K192]	1	Q14677	RNA-binding protein 10 OS=Homo sapiens OX=9606 GN=RBM10 PE=1 SV=3	P98175 [462-472]	1	119.3	85.6	105.9	105.5	87.5	96.3	0.930824	-0.10342	0.553308	438	0.257033	0.57731	0.238591
[R].VDQSAVGFEYQGKTEK.[H]	1xBiotin [K16]	Q14247 1xBiotin [K147]	2	Q14247	UPF0428 protein CXorf56 OS=Homo sapiens OX=9606 GN=CXorf56 PE=1 SV=1	Q9H5V9 [122-135]	1	115.8	98.3	97.8	111.9	94.8	81.5	0.924014	-0.114013	0.497658	435	0.303069	0.522827	0.281642
[K].DYKTGFGGK.[F]	1xBiotin [K3]	Q14247 1xBiotin [K266]	2	Q14247	Sterile alpha motif domain-containing protein 9-like OS=Homo sapiens OX=9606 GN=SAMD9L PE=1 SV=2	Q8IVG5 [1143-1158]	0	124.8	95.5	91.7	108.2	103.3	76.6	0.923397	-0.114976	0.60824	443	0.215925	0.627462	0.202413
[R].VELSGPKAAEPVSR.[R]	1xBiotin [K7]	Q9UHD8 1xBiotin [K99]	3	Q9UHD8	Src substrate cortactin OS=Homo sapiens OX=9606 GN=CTTN PE=1 SV=2	Q14247 [132-147]	1	91.4	106.4	114.8	102.3	103.3	81.6	0.918746	-0.122262	0.438144	430	0.358383	0.465656	0.331935
[K].SSGSAVGGKGIAPASPMLGNASNPNK.[A]	1xBiotin [K9]	P27448 1xBiotin [K463]	2	P27448	Ran GTPase-activating protein 1 OS=Homo sapiens OX=9606 GN=RANGAP1 PE=1 SV=1	P46060 [9-26]	1	116.8	96.5	99.7	135.6	130.4	21.1	0.917252	-0.124609	0.830796	449	0.0805058	0.845598	0.072836
[K].SPSVPKSPTPK.[S]	1xBiotin [K6]	Q9NVD7 1xBiotin [K13]	5	Q9NVD7	Cleavage stimulation factor subunit 2 tau variant OS=Homo sapiens OX=9606 GN=CSTF2T PE=1 SV=1	Q9H0L4 [146-159]	1	139.9	99.7	77	87.8	92.5	103.2	0.895452	-0.159313	0.591583	441	0.227984	0.613047	0.212506
[R].TLSSIKTATGVQGK.[E]	1xBiotin [K6]	Q9Y3P9 1xBiotin [K1058]	1	Q9Y3P9	ATP-dependent RNA helicase DDX3X OS=Homo sapiens OX=9606 GN=DDX3X PE=1 SV=3	O00571 [65-75]	1	69.7	106.1	140.8	114	74.7	94.8	0.895452	-0.159313	0.662553	444	0.17878	0.681952	0.166246
[K].VVSETNDTKVLR.[H]	1xBiotin [K9]	P05783 1xBiotin [K426]	3	P05783	Alpha-parvin OS=Homo sapiens OX=9606 GN=PARVA PE=1 SV=1	Q9NVD7 [8-18]	1	120	106.1	91.6	82	92.1	108.2	0.888574	-0.170436	0.35149	411	0.454087	0.39083	0.408013
[K].KLVWVPSDK.[S]	1xBiotin [K1]	P35579 1xBiotin [K30]	2	P35579	Clathrin interactor 1 OS=Homo sapiens OX=9606 GN=CLINT1 PE=1 SV=1	Q14677 [191-200]	1	125.4	111.1	85.8	92.9	123.4	61.3	0.861309	-0.215397	0.523521	436	0.281066	0.548737	0.260636
[K].IVKPGMK.[L]	1xBiotin [K3]	P12270 1xBiotin [K390]	5	P12270	Ran GTPase-activating protein 1 OS=Homo sapiens OX=9606 GN=RANGAP1 PE=1 SV=1	P46060 [402-412]	1	61.3	115.7	146	102	91	84	0.857585	-0.221648	0.577563	440	0.238401	0.599878	0.221937
[R].MEESFSSKYVPK.[Y]	1xBiotin [K8]	P42167 1xBiotin [K389]	11	P42167	Septin-9 OS=Homo sapiens OX=9606 GN=SEPTIN9 PE=1 SV=2	Q9UHD8 [93-106]	1	99	102.8	121.6	102.7	90.7	83.2	0.855288	-0.225519	0.15819	371	0.80082	0.19486	0.710278
[K].KHQVSVEGTNQTDVK.[A]	1xBiotin [K1]	Q14676 1xBiotin [K540]	1	Q14676	Keratin, type I cytoskeletal 18 OS=Homo sapiens OX=9606 GN=KRT18 PE=1 SV=2	P05783 [418-429]	1	112.3	107.1	105.7	108.9	75.9	90.2	0.845894	-0.241452	0.162343	375	0.789567	0.197842	0.703682
[R].KQLSYFDR.[R]	1xBiotin [K1]	Q07157 1xBiotin [K1357]	2	Q07157	Rab GTPase-activating protein 1 OS=Homo sapiens OX=9606 GN=RABGAP1 PE=1 SV=3	Q9Y3P9 [1053-1066]	1	95.4	103.3	126.4	202.5	52.9	19.5	0.845586	-0.241977	0.783797	447	0.105796	0.801331	0.0961878
[K].KQPSVLVTFPKEER.[K]	1xBiotin [K11]	O75179 1xBiotin [K1661]	2	O75179	Drebrin-like protein OS=Homo sapiens OX=9606 GN=DBNL PE=1 SV=1	Q9UJU6 [267-282]	1	116.3	103.3	105.5	46.6	175.5	52.7	0.845278	-0.242502	0.711288	446	0.147955	0.728831	0.137373
[K].LAETLAKTQVAGGQLSFK.[G]	1xBiotin [K7]	P46060 1xBiotin [K15]	1	P46060	HMG box transcription factor BBX OS=Homo sapiens OX=9606 GN=BBX PE=1 SV=1	Q8WY36 [149-167]	1	110.6	97.2	118	113.7	106.6	54	0.841928	-0.248232	0.434599	429	0.361911	0.462964	0.334452
[K].FAAKGEGQLGPAER.[A]	1xBiotin [K4]	P13639 1xBiotin [K239]	11	P13639	Src substrate cortactin OS=Homo sapiens OX=9606 GN=CTTN PE=1 SV=2	Q14247 [264-272]	1	94.9	115.5	116.8	87.3	92.6	92.8	0.833435	-0.262858	0.0680392	348	1.16724	0.0893503	1.0489
[K].TSSAFVGKTPEASPEPK.[D]	1xBiotin [K8]	Q99460 1xBiotin [K310]	3	Q99460	Lamina-associated polypeptide 2, isoforms beta/gamma OS=Homo sapiens OX=9606 GN=TMPO PE=1 SV=2	P42167 [382-393]	1	136.5	110.7	84.9	105.3	71.6	91.1	0.806986	-0.309385	0.296525	405	0.527939	0.334597	0.475478
[K].NSQDVLKTFK.[V]	1xBiotin [K7]	Q9UPQ0 1xBiotin [K552]	1	Q9UPQ0	Mediator of DNA damage checkpoint protein 1 OS=Homo sapiens OX=9606 GN=MDC1 PE=1 SV=3	Q14676 [540-554]	1	101.7	99.7	130.8	185.4	15.7	66.7	0.806141	-0.310896	0.696917	445	0.156819	0.71571	0.145263
[R].SVKAPVTK.[V]	1xBiotin [K3]	O00151 1xBiotin [K241]	2	O00151	Myosin-9 OS=Homo sapiens OX=9606 GN=MYH9 PE=1 SV=4	P35579 [30-38]	1	117	110.4	106	97.1	83.8	85.6	0.79934	-0.323119	0.013191	280	1.87972	0.0215296	1.66696
[R].SPAKTIAPQNAPR.[D]	1xBiotin [K4]	Q9NYF8 1xBiotin [K303]	1	Q9NYF8	26S proteasome non-ATPase regulatory subunit 1 OS=Homo sapiens OX=9606 GN=PSMD1 PE=1 SV=2	Q99460 [303-319]	1	278.6	27.4	27.7	91.3	83.2	91.8	0.798022	-0.325499	0.80172	448	0.0959773	0.817826	0.0873391
[R].MDKSAVGHEYQSK.[L]	1xBiotin [K3]	Q14247 1xBiotin [K97]	2	Q14247	Protein PRRC2C OS=Homo sapiens OX=9606 GN=PRRC2C PE=1 SV=4	Q9Y520 [940-952]	1	98.7	116.3	119	130.9	119.8	15.3	0.796407	-0.328422	0.576882	439	0.238913	0.600535	0.221462
[K].DYVKGFGGK.[F]	1xBiotin [K4]	Q14247 1xBiotin [K230]	3	Q14247	Elongation factor 2 OS=Homo sapiens OX=9606 GN=EEF2 PE=1 SV=4	P13639 [236-249]	1	113.9	112.2	108	83	95.6	87.4	0.796169	-0.328854	0.00514382	237	2.28871	0.00991868	2.00355
[K].LKDEPKIK.[V]	1xBiotin [K6]	Q9BZI7 1xBiotin [K267]	2	Q9BZI7	General transcription factor II-I OS=Homo sapiens OX=9606 GN=GTF2I PE=1 SV=2	P78347 [127-140]	1	104.8	117.5	113.2	108.2	89.8	66.4	0.788077	-0.343591	0.13445	365	0.871439	0.168339	0.773816
[K].TVDGPSGKLWR.[D]	1xBiotin [K8]	P04406 1xBiotin [K194]	1	P04406	Lamina-associated polypeptide 2, isoforms beta/gamma OS=Homo sapiens OX=9606 GN=TMPO PE=1 SV=2	P42167 [382-393]	1	93.4	117.4	125	110.8	69.6	83.9	0.787076	-0.345426	0.196162	389	0.707385	0.230453	0.637418
[K].DKNEATVSTGKIAK.[G]	1xBiotin [K11]	Q9Y450 1xBiotin [K140]	8	Q9Y450	Regulator of nonsense transcripts 3B OS=Homo sapiens OX=9606 GN=UPF3B PE=1 SV=1	Q9BZI7 [262-269]	2	123.6	111.6	102.3	99.9	80.5	82.1	0.777778	-0.36257	0.0461497	324	1.33583	0.0650938	1.18646
[K].GLNSPVLIGKSK.[D]	1xBiotin [K12]	Q4L235 1xBiotin [K732]	2	Q4L235	PDZ and LIM domain protein 1 OS=Homo sapiens OX=9606 GN=PDLIM1 PE=1 SV=4	O00151 [239-246]	1	110.6	117.5	112	81.8	97.9	80.2	0.764187	-0.388002	0.0114035	275	1.94296	0.0189506	1.72238
[R].MEESFSSKYVPK.[Y]	1xBiotin [K8]; 1xOxidation [M1]	P42167 1xBiotin [K389]	9	P42167	Nucleoprotein TPR OS=Homo sapiens OX=9606 GN=TPR PE=1 SV=3	P12270 [388-394]	0	135.5	90.6	114.3	95.5	72.2	91.9	0.762632	-0.390941	0.143992	367	0.841661	0.179304	0.746411
[R].LAHYNKR.[S]	1xBiotin [K6]	Q16778 1xBiotin [K86]; Q5QNW6 1xBiotin [K86]; P58876 1xBiotin [K86]	3	Q16778; Q5QNW6; P58876	HBS1-like protein OS=Homo sapiens OX=9606 GN=HBS1L PE=1 SV=1	Q9Y450 [130-143]	2	118.5	120.5	104.1	125.7	120	11.2	0.748761	-0.417422	0.487451	434	0.312069	0.513283	0.289643
[K].AASVPKVETVK.[S]	1xBiotin [K6]	P55010 1xBiotin [K413]	3	P55010	Src substrate cortactin OS=Homo sapiens OX=9606 GN=CTTN PE=1 SV=2	Q14247 [227-235]	1	119.3	108.8	115	103.5	75.6	77.8	0.748761	-0.417422	0.0385046	314	1.41449	0.0560401	1.2515
[K].GQKIVSCR.[I]	1xBiotin [K3]; 1xCarbamidomethyl [C7]	O75821 1xBiotin [K153]	3	O75821	Cytoplasmic protein NCK1 OS=Homo sapiens OX=9606 GN=NCK1 PE=1 SV=1	P16333 [73-81]	1	123.9	110.8	108.6	46	136.3	74.5	0.748034	-0.418825	0.346934	409	0.459753	0.38765	0.41156
[R].AMSTTSISSPQPGKLR.[S]	1xBiotin [K14]	Q9UJU6 1xBiotin [K280]	2	Q9UJU6	ATP-dependent RNA helicase DDX19A OS=Homo sapiens OX=9606 GN=DDX19A PE=1 SV=1	Q9NUU7 [19-29]	1	121.3	111.4	110.7	99.4	106.1	51	0.746942	-0.420931	0.176921	381	0.752222	0.212212	0.67323
[K].RTQAPTKASE.[-]	1xBiotin [K7]	P47914 1xBiotin [K156]	1	P47914	Src substrate cortactin OS=Homo sapiens OX=9606 GN=CTTN PE=1 SV=2	Q14247 [296-309]	1	83.4	142.2	120.4	105.2	104.9	43.9	0.734104	-0.445944	0.313899	407	0.50321	0.352462	0.452888
[R].SEPSAGIPKVTSR.[C]	1xBiotin [K9]	Q9Y520 1xBiotin [K948]	6	Q9Y520	Nucleolin OS=Homo sapiens OX=9606 GN=NCL PE=1 SV=3	P19338 [56-63]	1	130.1	102.3	117.3	94.3	15.1	140.8	0.71547	-0.483036	0.427124	428	0.369446	0.456065	0.340973
[R].SPEGTPQKIR.[Q]	1xBiotin [K8]	Q86WB0 1xBiotin [K31]	1	Q86WB0	Elongation factor 1-alpha 1 OS=Homo sapiens OX=9606 GN=EEF1A1 PE=1 SV=1	P68104 [386-392]	1	122.1	130.1	97.7	89.8	92.4	68	0.715061	-0.483861	0.055745	337	1.25379	0.0755948	1.12151
[R].VMLTTAGGTKGTVIK.[V]	1xBiotin [K10]	Q9UM54 1xBiotin [K403]	1	Q9UM54	Glyceraldehyde-3-phosphate dehydrogenase OS=Homo sapiens OX=9606 GN=GAPDH PE=1 SV=3	P04406 [187-197]	1	94.5	143.8	112.2	80.6	67.8	101.1	0.71184	-0.490375	0.124747	363	0.903971	0.15705	0.803962
[K].DTLGIGKVK.[R]	1xBiotin [K7]	P16333 1xBiotin [K79]	1	P16333	60S ribosomal protein L29 OS=Homo sapiens OX=9606 GN=RPL29 PE=1 SV=2	P47914 [150-159]	2	123.8	109.1	119.2	134.2	21.4	92.3	0.704061	-0.506227	0.354584	412	0.450281	0.393313	0.405262
[K].SMTNLQIKEEK.[V]	1xBiotin [K11]	Q9NUU7 1xBiotin [K29]	1	Q9NUU7	Beta-alanine-activating enzyme OS=Homo sapiens OX=9606 GN=AASDH PE=1 SV=3	Q4L235 [721-732]	1	87.8	108.8	156.3	84.9	67.4	94.8	0.700198	-0.514164	0.180831	382	0.742727	0.216334	0.664874
[K].KLEDGPK.[F]	1xBiotin [K1]	P68104 1xBiotin [K386]	2	P68104	Treacle protein OS=Homo sapiens OX=9606 GN=TCOF1 PE=1 SV=3	Q13428 [648-660]	1	133.6	99.7	121.4	91.3	101.4	52.6	0.69157	-0.532052	0.110905	357	0.955049	0.141971	0.847801
[K].RAEVLGHKTPEPAPR.[R]	1xBiotin [K8]	Q9UHD8 1xBiotin [K141]	3	Q9UHD8	Unconventional myosin-VI OS=Homo sapiens OX=9606 GN=MYO6 PE=1 SV=4	Q9UM54 [394-408]	1	83.9	120.5	151.3	77.5	104.7	62.1	0.686815	-0.542007	0.183543	383	0.736263	0.219005	0.659545
[K].KTAEAGGVTGKGQDGIGSK.[A]	1xBiotin [K11]	P09874 1xBiotin [K97]	1	P09874	Dihydropyrimidinase-related protein 4 OS=Homo sapiens OX=9606 GN=DPYSL4 PE=1 SV=2	O14531 [554-565]	1	91.1	130.8	135	43.6	152.5	47.1	0.681423	-0.553377	0.3792	418	0.421132	0.41458	0.382392
[R].TAQKIMAPPGGR.[S]	1xBiotin [K4]	O14531 1xBiotin [K557]	5	O14531	Nuclear-interacting partner of ALK OS=Homo sapiens OX=9606 GN=ZC3HC1 PE=1 SV=1	Q86WB0 [24-33]	1	118	124.9	115.2	86.8	89.3	65.9	0.675789	-0.565355	0.00826403	259	2.08281	0.0145817	1.83619
[K].ALGKSTVVPVPYEK.[M]	1xBiotin [K4]	P78347 1xBiotin [K130]	2	P78347	Eukaryotic translation initiation factor 5 OS=Homo sapiens OX=9606 GN=EIF5 PE=1 SV=2	P55010 [408-418]	1	91.4	131.4	135.5	25.9	107.2	108.6	0.674574	-0.567951	0.274795	402	0.560992	0.312391	0.505302
[K].HESQQDYSKGFGGK.[Y]	1xBiotin [K9]	Q14247 1xBiotin [K304]	2	Q14247	Pescadillo homolog OS=Homo sapiens OX=9606 GN=PES1 PE=1 SV=1	O00541 [511-521]	1	143.1	101.3	115.8	36.9	114.4	88.6	0.666019	-0.586365	0.196075	390	0.707578	0.22976	0.638726
[K].AVAASKER.[NS]	1xBiotin [K6]	P16403 1xBiotin [K52]	2	P16403	Septin-9 OS=Homo sapiens OX=9606 GN=SEPTIN9 PE=1 SV=2	Q9UHD8 [134-148]	2	126.4	118.9	115.2	116.5	75.4	47.6	0.664355	-0.589974	0.117638	361	0.929452	0.148921	0.827043
[K].KLNVTEQEK.[I]	1xBiotin [K1]	P06733 1xBiotin [K81]	1	P06733	Cold shock domain-containing protein E1 OS=Homo sapiens OX=9606 GN=CSDE1 PE=1 SV=2	O75534 [757-769]	1	92.6	128.5	139.8	113.9	60	65.2	0.66251	-0.593985	0.142723	366	0.845505	0.178209	0.74907
[R].LKNITLDDASAPR.[L]	1xBiotin [K2]	O75534 1xBiotin [K758]	4	O75534	Eukaryotic translation initiation factor 3 subunit G OS=Homo sapiens OX=9606 GN=EIF3G PE=1 SV=2	O75821 [151-158]	1	106.9	115.6	138.8	94.3	57.9	86.5	0.66067	-0.597999	0.0488283	328	1.31133	0.0680321	1.16729
[R].VMAGTLKLEDK.[Q]	1xBiotin [K7]; 1xOxidation [M2]	O00541 1xBiotin [K517]	1	O00541	Zinc fingers and homeoboxes protein 2 OS=Homo sapiens OX=9606 GN=ZHX2 PE=1 SV=1	Q9Y6X8 [6-14]	1	145.7	105.2	114.6	90.5	101.1	43	0.64186	-0.639668	0.114142	358	0.942555	0.145706	0.836522
[K].TGKYVPPSLR.[D]	1xBiotin [K3]	O75821 1xBiotin [K212]	1	O75821	LIM and calponin homology domains-containing protein 1 OS=Homo sapiens OX=9606 GN=LIMCH1 PE=1 SV=4	Q9UPQ0 [546-555]	1	197.8	46.5	121.9	49.6	106.3	78	0.638722	-0.64674	0.397949	423	0.400173	0.429936	0.366597
[K].AGEKSVK.[K]	1xBiotin [K4]	Q86VM9 1xBiotin [K635]	1	Q86VM9	Alpha-enolase OS=Homo sapiens OX=9606 GN=ENO1 PE=1 SV=2	P06733 [81-89]	1	95.9	157.4	113.2	97.1	51.1	85.3	0.637108	-0.650391	0.125262	364	0.902182	0.157265	0.803367
[R].VEKYTISQEAYDQR.[Q]	1xBiotin [K3]	Q99426 1xBiotin [K106]	4	Q99426	Ribosome biogenesis regulatory protein homolog OS=Homo sapiens OX=9606 GN=RRS1 PE=1 SV=2	Q15050 [221-234]	1	121.3	105	140.8	65.8	87.7	79.4	0.634432	-0.656462	0.0212207	297	1.67324	0.0326527	1.48608
[K].TPQKSVSFSLK.[N]	1xBiotin [K4]	Q13416 1xBiotin [K119]	2	Q13416	Eukaryotic translation initiation factor 3 subunit G OS=Homo sapiens OX=9606 GN=EIF3G PE=1 SV=2	O75821 [210-219]	1	63.3	149	155.1	96.7	61	75	0.63337	-0.65888	0.225993	396	0.645906	0.260805	0.583685
[K].MVELAKYAK.[Q]	1xBiotin [K6]	Q9H3U1 1xBiotin [K614]	2	Q9H3U1	Histone H1.2 OS=Homo sapiens OX=9606 GN=HIST1H1C PE=1 SV=2	P16403 [64-75]	1	101.5	136	131.1	75	134.7	21.7	0.627781	-0.671667	0.254112	399	0.594976	0.29105	0.536032
[K].KALAAAGYDVEK.[N]	1xBiotin [K1]	P16403 1xBiotin [K64]	3	P16403	Transducin-like enhancer protein 1 OS=Homo sapiens OX=9606 GN=TLE1 PE=1 SV=2	Q04724 [310-323]	1	127.2	101.3	141.3	90.7	64.6	74.9	0.622499	-0.683857	0.0289986	306	1.53762	0.0433083	1.36343
[K].TFNLEKQNHTPR.[K]	1xBiotin [K6]	Q15233 1xBiotin [K11]	1	Q15233	Histone H1.2 OS=Homo sapiens OX=9606 GN=HIST1H1C PE=1 SV=2	P16403 [47-54]	1	22.1	157.2	190.5	78.4	78	73.7	0.622228	-0.684484	0.417107	427	0.379752	0.446412	0.350264
[R].YQKSTELLIR.[K]	1xBiotin [K3]	P84243 1xBiotin [K57]	2	P84243	Tubulin-folding cofactor B OS=Homo sapiens OX=9606 GN=TBCB PE=1 SV=2	Q99426 [104-117]	1	175.4	112.1	82.9	59.6	155	15	0.61987	-0.689961	0.396751	422	0.401482	0.429657	0.366878
[M].AEYSYVKSTK.[L]	1xAcetyl [N-Term]; 1xBiotin [K7]	Q14331 1xAcetyl [N-Term]; 1xBiotin [K8]	1	Q14331	Golgin subfamily B member 1 OS=Homo sapiens OX=9606 GN=GOLGB1 PE=1 SV=2	Q14789 [2993-3007]	1	88.3	125.9	156.3	113	71.6	44.9	0.619433	-0.690979	0.167529	376	0.775911	0.203619	0.691182
[R].SSSSQTQPLKVQYQR.[Q]	1xBiotin [K10]	Q14789 1xBiotin [K3002]	4	Q14789	Origin recognition complex subunit 2 OS=Homo sapiens OX=9606 GN=ORC2 PE=1 SV=2	Q13416 [116-126]	1	103.9	135.9	132.6	48	82.6	96.9	0.610902	-0.710987	0.0526673	331	1.27846	0.0727158	1.13837
[R].LSTASCPTPKVQSR.[C]	1xBiotin [K10]; 1xCarbamidomethyl [C6]	Q9NQX3 1xBiotin [K288]	1	Q9NQX3	Exosome component 10 OS=Homo sapiens OX=9606 GN=EXOSC10 PE=1 SV=2	Q01780 [703-716]	1	107.4	138.4	127.9	57.9	90.7	77.8	0.605834	-0.723007	0.0204105	292	1.69015	0.0319438	1.49561
[K].NMVKSADGVIVSGVK.[D]	1xBiotin [K4]	Q9UNH7 1xBiotin [K193]	5	Q9UNH7	Histone H4 OS=Homo sapiens OX=9606 GN=HIST1H4A PE=1 SV=2	P62805 [69-79]	1	132.8	110.4	130.4	101.5	74.5	50.3	0.605728	-0.723258	0.0402114	315	1.39565	0.0583385	1.23404
[K].NLTKEAIR.[E]	1xBiotin [K4]	P23193 1xBiotin [K242]	1	P23193	Zinc finger CCCH domain-containing protein 18 OS=Homo sapiens OX=9606 GN=ZC3H18 PE=1 SV=2	Q86VM9 [632-638]	1	133.4	118.1	122.6	75.1	87.7	63	0.603582	-0.728378	0.00426498	225	2.37008	0.00866265	2.06235
[K].TSTVLKNR.[A]	1xBiotin [K6]	P57678 1xBiotin [K395]	1	P57678	High mobility group protein HMG-I/HMG-Y OS=Homo sapiens OX=9606 GN=HMGA1 PE=1 SV=3	P17096 [2-15]	1	63.1	178.4	132.9	55.7	109.1	60.8	0.602564	-0.730813	0.257559	401	0.589123	0.293527	0.532352
[K].ASTPVLKSSTPTPR.[S]	1xBiotin [K7]	Q04724 1xBiotin [K316]	2	Q04724	Transcription elongation factor A protein 1 OS=Homo sapiens OX=9606 GN=TCEA1 PE=1 SV=2	P23193 [239-246]	1	134.8	128	111.9	107	81.3	37.1	0.601548	-0.733248	0.0817258	353	1.08764	0.105804	0.975499
[R].LAKASTPALAK.[H]	1xBiotin [K3]	Q8IV32 1xBiotin [K127]	2	Q8IV32	Gem-associated protein 4 OS=Homo sapiens OX=9606 GN=GEMIN4 PE=1 SV=2	P57678 [390-397]	1	71.4	176.4	129	74.6	71.7	77	0.592622	-0.754816	0.16761	377	0.775699	0.203178	0.692124
[K].AAATSAKK.[V]	1xBiotin [K8]	P19338 1xBiotin [K63]	1	P19338	Microtubule-associated protein 4 OS=Homo sapiens OX=9606 GN=MAP4 PE=1 SV=3	P27816 [968-986]	1	59.2	243.1	74.6	112.9	53.8	56.4	0.591934	-0.756491	0.454621	433	0.34235	0.479819	0.318922
[K].QGVAEAAGKTK.[E]	1xBiotin [K]	P37840 1xBiotin [K]	8	P37840	Gephyrin OS=Homo sapiens OX=9606 GN=GPHN PE=1 SV=1	Q9NQX3 [279-292]	1	130.6	120.1	126.5	85.9	73.3	63.7	0.590933	-0.758933	0.00194494	179	2.71109	0.00496557	2.30403
[K].SAAQAAAQTNSNAAGKQLR.[K]	1xBiotin [K16]	Q8NC51 1xBiotin [K68]	2	Q8NC51	Heterogeneous nuclear ribonucleoprotein L OS=Homo sapiens OX=9606 GN=HNRNPL PE=1 SV=2	P14866 [534-541]	1	165.1	119.8	92.6	71.2	67.1	84.2	0.589404	-0.762671	0.0764947	351	1.11637	0.0995957	1.00176
[K].HVSDDMKTHK.[N]	1xBiotin [K7]	Q01518 1xBiotin [K279]	1	Q01518	Zinc finger protein 174 OS=Homo sapiens OX=9606 GN=ZNF174 PE=1 SV=1	Q15697 [219-238]	1	129.5	111.4	137.1	82.9	66.7	72.4	0.587302	-0.767827	0.00441788	230	2.35479	0.00877813	2.0566
[M].SALEKSMHLGR.[L]	1xAcetyl [N-Term]; 1xBiotin [K5]	Q9Y570 1xAcetyl [N-Term]; 1xBiotin [K6]	4	Q9Y570	Adenylyl cyclase-associated protein 1 OS=Homo sapiens OX=9606 GN=CAP1 PE=1 SV=5	Q01518 [273-282]	1	121.1	128.8	128.7	79.4	69.3	72.7	0.584786	-0.774019	0.000179729	94	3.74538	0.000873787	3.05859
[K].AAGAGKVTK.[S]	1xBiotin [K6]	P68104 1xBiotin [K450]	9	P68104	NKAP-like protein OS=Homo sapiens OX=9606 GN=NKAPL PE=2 SV=3	Q5M9Q1 [356-366]	1	128.2	137.6	113.3	92.3	67.6	61	0.582696	-0.779185	0.0112966	273	1.94705	0.0189103	1.7233
[R].VGKDSFWAK.[A]	1xBiotin [K3]	Q9UJU6 1xBiotin [K176]	1	Q9UJU6	Heterogeneous nuclear ribonucleoproteins C1/C2 OS=Homo sapiens OX=9606 GN=HNRNPC PE=1 SV=4	P07910 [2-12]	1	117.9	133.5	129.4	79.6	68.9	70.8	0.575893	-0.796128	0.000708187	145	3.14985	0.00223201	2.6513
[K].SKVVVTEK.[A]	1xBiotin [K2]	Q99733 1xBiotin [K140]	3	Q99733	Plasminogen activator inhibitor 1 RNA-binding protein OS=Homo sapiens OX=9606 GN=SERBP1 PE=1 SV=2	Q8NC51 [53-71]	1	134.4	131.1	116.2	82.8	73.6	61.8	0.571653	-0.806788	0.00273747	201	2.56265	0.006224	2.20593
[K].EGVLYVGSKTK.[E]	1xBiotin [K]	P37840 1xBiotin [K]	5	P37840	Transducin-like enhancer protein 1 OS=Homo sapiens OX=9606 GN=TLE1 PE=1 SV=2	Q04724 [303-316]	1	127.1	129.5	126	82.8	65.2	69.4	0.568217	-0.815485	0.000523494	132	3.28109	0.0018124	2.74175
[K].QPAGKVQIVSK.[K]	1xBiotin [K5]	P27816 1xBiotin [K991]	9	P27816	Drebrin-like protein OS=Homo sapiens OX=9606 GN=DBNL PE=1 SV=1	Q9UJU6 [174-182]	1	131.2	121.5	130.3	79.7	63.4	73.9	0.56658	-0.819649	0.000624333	137	3.20458	0.00208263	2.68139
[K].ENPQQEGAKGAKPCAVSAGR.[S]	1xBiotin [K9]; 1xCarbamidomethyl [C14]	Q15697 1xBiotin [K227]	1	Q15697	Alpha-synuclein OS=Homo sapiens OX=9606 GN=SNCA PE=1 SV=1	P37840 [24-34]	1	126.7	140.6	118.9	50.1	79	84.7	0.553599	-0.853086	0.00991084	266	2.00389	0.0170273	1.76885
[K].GSLGQGTAPVLPGKTGPTVTQVK.[A]	1xBiotin [K14]	Q13428 1xBiotin [K746]	1	Q13428	Coiled-coil domain-containing protein 71 OS=Homo sapiens OX=9606 GN=CCDC71 PE=1 SV=3	Q8IV32 [125-135]	1	112.1	103.1	171.9	79	56.5	77.4	0.549987	-0.86253	0.063329	345	1.1984	0.083888	1.0763
[R].KENQIYSADEK.[R]	1xBiotin [K1]	Q5M9Q1 1xBiotin [K356]	1	Q5M9Q1	Transgelin-2 OS=Homo sapiens OX=9606 GN=TAGLN2 PE=1 SV=3	P37802 [13-20]	1	141.7	123.9	122.3	97.7	74.2	40.2	0.54679	-0.87094	0.0302134	307	1.5198	0.0449756	1.34702
[R].APVSQAAKFDPSTK.[I]	1xBiotin [K8]	Q01780 1xBiotin [K710]	2	Q01780	Protein phosphatase methylesterase 1 OS=Homo sapiens OX=9606 GN=PPME1 PE=1 SV=3	Q9Y570 [2-12]	1	135.5	129	124.4	80.3	84.1	46.8	0.54307	-0.880789	0.00850223	260	2.07047	0.0149443	1.82552
[K].VFSGKSER.[S]	1xBiotin [K5]	P14866 1xBiotin [K538]	1	P14866	Protein unc-45 homolog A OS=Homo sapiens OX=9606 GN=UNC45A PE=1 SV=1	Q9H3U1 [609-617]	1	100.5	128.6	161.9	25	106.1	77.8	0.534271	-0.904356	0.11012	355	0.958134	0.14176	0.848446
[K].ISKGANPVEIR.[R]	1xBiotin [K3]	P10809 1xBiotin [K133]	6	P10809	Sorting nexin-6 OS=Homo sapiens OX=9606 GN=SNX6 PE=1 SV=1	Q9UNH7 [190-204]	1	135.6	126.9	129.1	68.4	68.5	71.5	0.532176	-0.910025	2.62551e-05	35	4.58079	0.000342817	3.46494
[K].SSDIAKTFR.[K]	1xBiotin [K6]	P13797 1xBiotin [K91]	3	P13797	Protein FRG1 OS=Homo sapiens OX=9606 GN=FRG1 PE=1 SV=1	Q14331 [2-11]	1	143.2	118.6	130.5	72.3	64.8	70.5	0.529187	-0.918151	0.00117211	159	2.93103	0.0033689	2.47251
[R].AMQVAKVSTASVGR.[F]	1xBiotin [K6]	Q15050 1xBiotin [K226]	1	Q15050	Microtubule-associated protein 4 OS=Homo sapiens OX=9606 GN=MAP4 PE=1 SV=3	P27816 [987-997]	1	128.9	146	117.6	83.1	97.9	26.5	0.528662	-0.919581	0.0569816	339	1.24427	0.0768159	1.11455
[K].KKPTPVLLPQSK.[Q]	1xBiotin [K]	Q9UGP8 1xBiotin [K]	9	Q9UGP8	Nucleosome assembly protein 1-like 4 OS=Homo sapiens OX=9606 GN=NAP1L4 PE=1 SV=1	Q99733 [139-146]	1	126.6	134.9	131.3	75.3	65.8	66.1	0.527495	-0.922771	9.5743e-05	75	4.01889	0.000583394	3.23404
[K].YAKQHVPEQHPK.[D]	1xBiotin [K3]	Q9H3U1 1xBiotin [K617]	4	Q9H3U1	Charged multivesicular body protein 5 OS=Homo sapiens OX=9606 GN=CHMP5 PE=1 SV=1	Q9NZZ3 [104-114]	1	111.8	152.2	128.9	65.5	58.7	83	0.527361	-0.923138	0.0108476	271	1.96467	0.0182927	1.73772
[K].AQYKSLIGVEYKPVSATGAEDKDK.[K]	1xBiotin [K4]	P07814 1xBiotin [K943]	1	P07814	Alpha-synuclein OS=Homo sapiens OX=9606 GN=SNCA PE=1 SV=1	P37840 [35-45]	1	119.7	89.1	184	48.6	88.2	70.3	0.52724	-0.923467	0.109884	356	0.959066	0.141059	0.850599
[K].FTPVASKFSPGAPGGSGSQPNQK.[L]	1xBiotin [K7]	Q15942 1xBiotin [K279]	2	Q15942	Treacle protein OS=Homo sapiens OX=9606 GN=TCOF1 PE=1 SV=3	Q13428 [733-755]	1	192.7	84.7	115.4	58.3	52.5	96.3	0.52724	-0.923467	0.15118	370	0.820506	0.186728	0.728791
[R].EGMKNTSYVLK.[H]	1xBiotin [K4]; 1xOxidation [M3]	Q8ND82 1xBiotin [K167]	5	Q8ND82	Bifunctional glutamate/proline--tRNA ligase OS=Homo sapiens OX=9606 GN=EPRS PE=1 SV=5	P07814 [940-963]	2	142.6	133.2	117.2	61.5	69.6	75.9	0.526718	-0.924899	0.00188264	178	2.72523	0.00483351	2.31574
[R].AQGGQTQSPTKSHTPSPTSPK.[S]	1xBiotin [K11]	P40123 1xBiotin [K304]	5	P40123	Plastin-3 OS=Homo sapiens OX=9606 GN=PLS3 PE=1 SV=4	P13797 [86-94]	1	136.9	139.2	117.4	88.6	55.6	62.4	0.525032	-0.929523	0.0069662	252	2.157	0.0126331	1.89849
[R].ALSTGEKGFGYK.[G]	1xBiotin [K7]	P62937 1xBiotin [K44]	2	P62937	Nucleolin OS=Homo sapiens OX=9606 GN=NCL PE=1 SV=3	P19338 [89-102]	2	148.3	109.2	136.7	56.2	85.5	64.1	0.52207	-0.937685	0.0124174	278	1.90597	0.0204128	1.6901
[R].KSTTPCMVR.[T]	1xBiotin [K1]; 1xCarbamidomethyl [C6]	Q9Y6X8 1xBiotin [K6]	1	Q9Y6X8	Elongation factor 1-alpha 1 OS=Homo sapiens OX=9606 GN=EEF1A1 PE=1 SV=1	P68104 [445-453]	1	130.1	141.8	122.9	93.2	24.5	87.5	0.519757	-0.944091	0.0495464	329	1.30499	0.0688229	1.16227
[K].SSTHNKPSEGKAANPK.[M]	1xBiotin [K11]	Q9NUQ6 1xBiotin [K401]	6	Q9NUQ6	Histone H3.3 OS=Homo sapiens OX=9606 GN=H3F3A PE=1 SV=2	P84243 [55-64]	1	171.9	116.1	107.5	51.9	82.8	69.8	0.517067	-0.951577	0.0448845	322	1.3479	0.0637025	1.19584
[M].ASNVTNKTDPR.[S]	1xAcetyl [N-Term]; 1xBiotin [K7]	P07910 1xAcetyl [N-Term]; 1xBiotin [K8]	1	P07910	60 kDa heat shock protein, mitochondrial OS=Homo sapiens OX=9606 GN=HSPD1 PE=1 SV=2	P10809 [131-141]	1	126.4	135.4	134.2	85.7	79.8	38.4	0.514899	-0.957639	0.0133949	281	1.87306	0.0217846	1.66185
[K].KQVAPEKPVK.[K]	1xBiotin [K1]	P53999 1xBiotin [K29]	3	P53999	Msx2-interacting protein OS=Homo sapiens OX=9606 GN=SPEN PE=1 SV=1	Q96T58 [2085-2094]	1	139.9	131.3	125.3	74.2	64.4	64.9	0.513241	-0.962292	0.000264595	103	3.57742	0.00117398	2.93034
[K].DSFQKVILR.[RTSKG]	1xBiotin [K5]	Q14593 1xBiotin [K130]	3	Q14593	Zinc finger protein 280C OS=Homo sapiens OX=9606 GN=ZNF280C PE=1 SV=1	Q8ND82 [164-174]	1	137.7	128	131	77.2	59.9	66.2	0.512478	-0.964438	0.000375703	115	3.42516	0.00149301	2.82594
[K].SVKLSSQISAGEEK.[W]	1xBiotin [K3]	Q86UE4 1xBiotin [K292]	2	Q86UE4	Protein unc-45 homolog A OS=Homo sapiens OX=9606 GN=UNC45A PE=1 SV=1	Q9H3U1 [615-626]	1	97.6	150.3	149	103.7	37.3	62	0.511464	-0.967296	0.0678622	347	1.16837	0.0893747	1.04879
[K].TTVDAMKLGVK.[E]	1xBiotin [K7]	Q9NZZ3 1xBiotin [K110]	1	Q9NZZ3	Glyceraldehyde-3-phosphate dehydrogenase OS=Homo sapiens OX=9606 GN=GAPDH PE=1 SV=3	P04406 [261-271]	1	178.8	69.9	151	38.5	111.3	50.5	0.501126	-0.996755	0.169283	378	0.771387	0.204662	0.688963
[K].EMSLHEKASTPVLK.[S]	1xBiotin [K7]	Q04724 1xBiotin [K309]	1	Q04724	Translocation protein SEC63 homolog OS=Homo sapiens OX=9606 GN=SEC63 PE=1 SV=2	Q9UGP8 [534-545]	1	119.3	120.4	160.9	93.9	77.1	28.5	0.498003	-1.00577	0.0486546	327	1.31288	0.0679974	1.16751
[K].AAATPAKKTVTPAK.[A]	2xBiotin [K7; K8]	P19338 2xBiotin [K95; K96]	1	P19338	Nucleosome assembly protein 1-like 4 OS=Homo sapiens OX=9606 GN=NAP1L4 PE=1 SV=1	Q99733 [133-140]	1	118.8	129.5	153.4	89.5	70	38.7	0.493403	-1.01916	0.0195827	288	1.70813	0.0310739	1.5076
[K].VVKQASEGPLK.[G]	1xBiotin [K3]	P04406 1xBiotin [K263]	1	P04406	Peptidyl-prolyl cis-trans isomerase A OS=Homo sapiens OX=9606 GN=PPIA PE=1 SV=2	P62937 [38-49]	1	208.8	71	122	63.5	40.5	94.2	0.49328	-1.01952	0.190683	386	0.719689	0.225756	0.64636
[R].DAVTYTEHAKR.[K]	1xBiotin [K10]	P62805 1xBiotin [K78]	1	P62805	Activated RNA polymerase II transcriptional coactivator p15 OS=Homo sapiens OX=9606 GN=SUB1 PE=1 SV=3	P53999 [29-38]	1	147.9	139.9	115	91.2	89.6	16.4	0.489573	-1.0304	0.0614674	344	1.21135	0.0816588	1.088
[K].DELTESPKYIQK.[Q]	1xBiotin [K8]	Q8NC51 1xBiotin [K236]	3	Q8NC51	Tight junction protein ZO-1 OS=Homo sapiens OX=9606 GN=TJP1 PE=1 SV=3	Q07157 [1357-1364]	1	157.8	130.9	114.3	63.8	48.1	85.1	0.488834	-1.03258	0.0144195	284	1.84105	0.0232032	1.63445
[K].LADPVTLKIETK.[V]	1xBiotin [K8]	Q96T58 1xBiotin [K2967]	2	Q96T58	Zyxin OS=Homo sapiens OX=9606 GN=ZYX PE=1 SV=1	Q15942 [273-295]	1	129.4	123.8	150	46.4	59.8	90.6	0.488095	-1.03477	0.0108958	272	1.96274	0.0183065	1.7374
[R].IAEKGSTIETEQK.[E]	1xBiotin [K4]	Q8N8S7 1xBiotin [K461]	2	Q8N8S7	Zinc finger protein 273 OS=Homo sapiens OX=9606 GN=ZNF273 PE=1 SV=3	Q14593 [126-134]	1	145.5	109.3	148.6	72.9	83.9	39.8	0.487357	-1.03695	0.019647	290	1.7067	0.030961	1.50918
[R].GKEGAIIVDPAR.[E]	1xBiotin [K2]	Q9H3U1 1xBiotin [K279]	1	Q9H3U1	Protein enabled homolog OS=Homo sapiens OX=9606 GN=ENAH PE=1 SV=2	Q8N8S7 [458-470]	1	95.9	139.6	168	76.7	61	58.9	0.487237	-1.03731	0.0336319	309	1.47325	0.0497403	1.30329
[R].FEHSAKLR.[R]	1xBiotin [K6]	Q9UPT9 1xBiotin [K417]	1	Q9UPT9	Ankyrin repeat domain-containing protein 17 OS=Homo sapiens OX=9606 GN=ANKRD17 PE=1 SV=3	O75179 [1651-1664]	2	132.4	137.2	136.7	78.3	61.5	53.8	0.476495	-1.06947	0.000660372	141	3.18021	0.00214035	2.66951
[R].MSDVVKGVYK.[E]	1xBiotin [K6]	Q71RC2 1xBiotin [K509]	2	Q71RC2	Non-POU domain-containing octamer-binding protein OS=Homo sapiens OX=9606 GN=NONO PE=1 SV=4	Q15233 [6-17]	1	130.9	135.5	140.2	58.3	108.4	26.8	0.475898	-1.07128	0.0411101	318	1.38605	0.0590797	1.22856
[K].QDGLSPKEISCR.[A]	1xBiotin [K7]; 1xCarbamidomethyl [C11]	A1X283 1xBiotin [K722]	1	A1X283	Nucleolar and coiled-body phosphoprotein 1 OS=Homo sapiens OX=9606 GN=NOLC1 PE=1 SV=2	Q14978 [143-155]	2	160.8	130.5	116.1	32.1	100.9	59.6	0.472754	-1.08084	0.0403214	316	1.39446	0.0583129	1.23424
[K].WTSQHSNTQTLGK.[-]	1xBiotin [K13]	Q6PKG0 1xBiotin [K1096]	2	Q6PKG0	Plasminogen activator inhibitor 1 RNA-binding protein OS=Homo sapiens OX=9606 GN=SERBP1 PE=1 SV=2	Q8NC51 [229-240]	1	31.3	161.5	215.4	169.7	10.4	11.7	0.469868	-1.08967	0.396559	421	0.401692	0.430469	0.366058
[K].NVLCSACSGQGGKSGAVQK.[C]	1xBiotin [K13]; 2xCarbamidomethyl [C4; C7]	O60884 1xBiotin [K152]	1	O60884	Integrin beta-1 OS=Homo sapiens OX=9606 GN=ITGB1 PE=1 SV=2	P05556 [785-798]	1	215.9	98.6	94.3	60.6	89.7	40.9	0.46771	-1.09631	0.161409	374	0.792073	0.197229	0.705028
[R].LAVDKSASLK.[N]	1xBiotin [K5]	Q96T58 1xBiotin [K2089]	3	Q96T58	SPATS2-like protein OS=Homo sapiens OX=9606 GN=SPATS2L PE=1 SV=2	Q9NUQ6 [391-406]	1	160.9	107.9	141.1	85.2	22.9	81.9	0.463528	-1.10927	0.0451056	323	1.34577	0.0638182	1.19506
[K].GTKVIVMEK.[C]	1xBiotin [K3]	P16333 1xBiotin [K132]	3	P16333	Spartin OS=Homo sapiens OX=9606 GN=SPART PE=1 SV=1	Q8N0X7 [460-481]	1	147.5	115.9	147.4	62.5	74.6	52.2	0.460808	-1.11776	0.00393331	221	2.40524	0.00813359	2.08972
[R].TLLIKTVETR.[D]	1xBiotin [K5]	P08670 1xBiotin [K445]	14	P08670	Poly [ADP-ribose] polymerase 1 OS=Homo sapiens OX=9606 GN=PARP1 PE=1 SV=4	P09874 [87-105]	2	139.8	131.9	139.7	61.7	59	68	0.458678	-1.12445	3.78521e-05	46	4.42191	0.000376052	3.42475
[K].LAGDMKSK.[V]	1xBiotin [K8]	Q99733 1xBiotin [K140]	1	Q99733	RNA-binding protein 10 OS=Homo sapiens OX=9606 GN=RBM10 PE=1 SV=3	P98175 [916-925]	1	146.6	136.8	129	40.3	71.5	75.9	0.455141	-1.13562	0.00368625	219	2.43342	0.00769231	2.11394
[R].AASIFGGAKPVDTAAR.[E]	1xBiotin [K9]	P23588 1xBiotin [K365]	3	P23588	Adenylyl cyclase-associated protein 2 OS=Homo sapiens OX=9606 GN=CAP2 PE=1 SV=1	P40123 [294-314]	1	133.6	149.2	129.8	15.3	159.1	13	0.454193	-1.13862	0.197957	391	0.703429	0.231372	0.63569
[K].TVKGGISETR.[I]	1xBiotin [K3]	P11171 1xBiotin [K808]	5	P11171	E3 ubiquitin-protein ligase RNF213 OS=Homo sapiens OX=9606 GN=RNF213 PE=1 SV=3	Q63HN8 [507-519]	1	142.2	152.9	117.8	64.1	65.5	57.5	0.453136	-1.14198	0.00213391	186	2.67082	0.005243	2.28042
[K].VNEKTVGVIVSR.[E]	1xBiotin [K4]	Q9UGU0 1xBiotin [K602]	2	Q9UGU0	Transcription factor 20 OS=Homo sapiens OX=9606 GN=TCF20 PE=1 SV=3	Q9UGU0 [599-610]	1	107.8	120	185.3	67.1	87.2	32.6	0.452433	-1.14422	0.0592702	343	1.22716	0.0789693	1.10254
[R].LQKVMNHITDGPR.[K]	1xBiotin [K3]	Q63HN8 1xBiotin [K509]	2	Q63HN8	Histone H2B type 2-E OS=Homo sapiens OX=9606 GN=HIST2H2BE PE=1 SV=3 Histone H2B type 2-F OS=Homo sapiens OX=9606 GN=HIST2H2BF PE=1 SV=3 Histone H2B type 1-D OS=Homo sapiens OX=9606 GN=HIST1H2BD PE=1 SV=2	Q16778 [45-58]; Q5QNW6 [45-58]; P58876 [45-58]	1	122.3	154.6	137.6	65	76	44.6	0.447768	-1.15918	0.00432917	227	2.3636	0.00871556	2.0597
[K].AQYKSLIGVEYKPVSATGAEDK.[D]	1xBiotin [K4]	P07814 1xBiotin [K943]	3	P07814	Msx2-interacting protein OS=Homo sapiens OX=9606 GN=SPEN PE=1 SV=1	Q96T58 [2960-2971]	1	157.1	107.9	150.5	27.6	141.5	15.4	0.444043	-1.17123	0.147924	369	0.829961	0.183201	0.737071
[K].TNTTASAKVAPVR.[V]	1xBiotin [K8]	Q13428 1xBiotin [K655]	1	Q13428	Protein unc-45 homolog A OS=Homo sapiens OX=9606 GN=UNC45A PE=1 SV=1	Q9H3U1 [278-289]	1	302.6	82	30.9	32.8	92.7	58.9	0.443803	-1.17201	0.416796	426	0.380077	0.447126	0.34957
[R].EVQQKIEK.[Q]	1xBiotin [K5]	P37802 1xBiotin [K17]	1	P37802	SH3 and PX domain-containing protein 2B OS=Homo sapiens OX=9606 GN=SH3PXD2B PE=1 SV=3	A1X283 [716-727]	1	279.6	58.3	77.8	62.2	33.4	88.7	0.443349	-1.17349	0.347456	410	0.459101	0.387286	0.411968
[R].IQPEEKPVEVSPAVTKGLYIAK.[Q]	1xBiotin [K16]	Q8N0X7 1xBiotin [K475]	1	Q8N0X7	Replication protein A 70 kDa DNA-binding subunit OS=Homo sapiens OX=9606 GN=RPA1 PE=1 SV=2	P27694 [164-183]	1	117.1	142.4	156.8	68.3	77.7	37.6	0.441028	-1.18106	0.00984239	265	2.0069	0.0169735	1.77023
[K].AMEAVAAQGKAK.[K-]	1xBiotin [K12]	P18669 1xBiotin [K253]	2	P18669	Destrin OS=Homo sapiens OX=9606 GN=DSTN PE=1 SV=3	P60981 [22-30]	1	139.5	149.5	128.9	50.2	42.2	89.6	0.435511	-1.19922	0.00763358	254	2.11727	0.0137344	1.86219
[K].GTKGPGITGTK.[G]	1xBiotin [K3]	P98175 1xBiotin [K464]	1	P98175	Protein 4.1 OS=Homo sapiens OX=9606 GN=EPB41 PE=1 SV=4	P11171 [806-815]	1	323.6	39.4	55.7	75	66.5	39.9	0.433246	-1.20674	0.441771	431	0.354803	0.468421	0.329364
[K].SSSAQQKTVSSTK.[L]	1xBiotin [K7]	P11717 1xBiotin [K2470]	1	P11717	Ubiquitin carboxyl-terminal hydrolase 22 OS=Homo sapiens OX=9606 GN=USP22 PE=1 SV=2	Q9UPT9 [412-419]	1	138.3	151	129.5	35.7	61.7	83.8	0.432665	-1.20868	0.00652569	246	2.18537	0.0121229	1.91639
[K].WCPTTNKPVKSPTPTVNPR.[K]	1xBiotin [K10]; 1xCarbamidomethyl [C2]	Q8WY36 1xBiotin [K158]	1	Q8WY36	Cytoplasmic protein NCK1 OS=Homo sapiens OX=9606 GN=NCK1 PE=1 SV=1	P16333 [130-138]	1	26.6	85.9	306.9	30.4	74.6	75.6	0.430615	-1.21553	0.409911	425	0.38731	0.440775	0.355783
[K].KQPVQKGVKPQAK.[A]	1xBiotin [K6]	Q14978 1xBiotin [K148]	2	Q14978	Vimentin OS=Homo sapiens OX=9606 GN=VIM PE=1 SV=4	P08670 [441-450]	1	143.8	138.1	139.4	78.7	31.1	68.9	0.424163	-1.23731	0.0052124	238	2.28296	0.0100087	1.99962
[K].SAVTTVVNPKYEGK.[-]	1xBiotin [K]	P05556 1xBiotin [K]	3	P05556	Alpha-enolase OS=Homo sapiens OX=9606 GN=ENO1 PE=1 SV=2	P06733 [72-81]	1	144.3	139.4	139	37.9	72	67.4	0.419446	-1.25344	0.00163943	171	2.78531	0.00438141	2.35839
[R].SQKIQEELR.[G]	1xBiotin [K3]	O15541 1xBiotin [K139]	2	O15541	Cation-independent mannose-6-phosphate receptor OS=Homo sapiens OX=9606 GN=IGF2R PE=1 SV=3	P11717 [2464-2476]	1	140.6	149.1	133.3	57.6	66.9	52.6	0.418676	-1.25609	0.000188732	96	3.72415	0.000898443	3.04651
[R].VIEGKNSSAVEQDHAK.[T]	1xBiotin [K5]	Q9NXV6 1xBiotin [K149]	2	Q9NXV6	Extended synaptotagmin-1 OS=Homo sapiens OX=9606 GN=ESYT1 PE=1 SV=1	Q9BSJ8 [347-355]	1	139.6	153.5	130.4	67.9	53	55.6	0.416765	-1.26269	0.000536722	135	3.27025	0.0018169	2.74067
[R].ALNATKLER.[V]	1xBiotin [K6]	Q9NV06 1xBiotin [K49]	2	Q9NV06	DnaJ homolog subfamily A member 2 OS=Homo sapiens OX=9606 GN=DNAJA2 PE=1 SV=1	O60884 [140-158]	1	128.6	142.4	153	56.8	49.9	69.3	0.415094	-1.26849	0.000801377	148	3.09616	0.00247452	2.60651
[K].YVKGLIEGK.[S]	1xBiotin [K3]	Q9BSJ8 1xBiotin [K349]	3	Q9BSJ8	Septin-9 OS=Homo sapiens OX=9606 GN=SEPTIN9 PE=1 SV=2	Q9UHD8 [63-76]	1	177	107.4	140	78.1	18.9	78.7	0.413996	-1.27231	0.0425861	319	1.37073	0.0610089	1.21461
[K].FQDLGVKNSEPSAR.[H]	1xBiotin [K7]	Q9UHD8 1xBiotin [K69]	3	Q9UHD8	La-related protein 4 OS=Homo sapiens OX=9606 GN=LARP4 PE=1 SV=3	Q71RC2 [504-513]	1	138.1	164.8	122.1	61.8	52.9	60.4	0.412	-1.27928	0.00284191	205	2.54639	0.00633537	2.19823
[R].AAPGAEFAPNKR.[R]	1xBiotin [K11]	Q15233 1xBiotin [K467]	2	Q15233	Protein LYRIC OS=Homo sapiens OX=9606 GN=MTDH PE=1 SV=2	Q86UE4 [290-303]	1	144.8	129.1	152.4	72.9	56.6	44.2	0.40746	-1.29527	0.00144801	168	2.83923	0.00393892	2.40462
[K].QYGLKMK.[T]	1xBiotin [K5]	Q9UQ80 1xBiotin [K258]	4	Q9UQ80	Melanoma-associated antigen D2 OS=Homo sapiens OX=9606 GN=MAGED2 PE=1 SV=2	Q9UNF1 [45-56]	1	156.7	130.2	139.6	59.5	62.5	51.6	0.407034	-1.29678	0.000556972	136	3.25417	0.00187159	2.72779
[K].EQQSNIAVFQGKK.[I]	1xBiotin [K13]	Q8NEF9 1xBiotin [K424]	3	Q8NEF9	E3 ubiquitin-protein ligase RNF113A OS=Homo sapiens OX=9606 GN=RNF113A PE=1 SV=1	O15541 [137-145]	1	173.5	126.2	127.1	40.2	64.2	68.6	0.405342	-1.30279	0.0092001	262	2.03621	0.0160475	1.79459
[K].AAFQYGIKMSEGR.[K]	1xBiotin [K8]	Q13123 1xBiotin [K509]	2	Q13123	Histone H2B type 1-D OS=Homo sapiens OX=9606 GN=HIST1H2BD PE=1 SV=2	P58876 [2-12]	1	127.6	145.4	154.3	66.7	50.3	55.7	0.404166	-1.30698	0.000771899	147	3.11244	0.00239971	2.61984
[K].TIAPALVSKK.[L]	1xBiotin [K10]	P06733 1xBiotin [K81]	3	P06733	CDKN2A-interacting protein OS=Homo sapiens OX=9606 GN=CDKN2AIP PE=1 SV=3	Q9NXV6 [145-160]	1	153.6	115.5	160.4	68.4	30	72.1	0.396973	-1.33289	0.0112453	274	1.94903	0.0187559	1.72686
[K].KGDLLLNR.[V]	1xBiotin [K1]	Q15008 1xBiotin [K372]	3	Q15008	RNA-binding protein 33 OS=Homo sapiens OX=9606 GN=RBM33 PE=1 SV=3	Q96EV2 [971-986]	1	154.1	142.6	133	31	120.5	18.7	0.39609	-1.3361	0.0570475	340	1.24376	0.0766785	1.11533
[R].DETDSKTASPWK.[S]	1xBiotin [K6]	Q13813 1xBiotin [K1187]	6	Q13813	Spectrin alpha chain, non-erythrocytic 1 OS=Homo sapiens OX=9606 GN=SPTAN1 PE=1 SV=3	Q13813 [1182-1193]	1	149.3	122.4	158.7	60	77.1	32.5	0.394052	-1.34354	0.00683482	248	2.16527	0.0125948	1.89981
[R].EGMKNTSYVLK.[H]	1xBiotin [K4]	Q8ND82 1xBiotin [K167]	9	Q8ND82	Proliferation-associated protein 2G4 OS=Homo sapiens OX=9606 GN=PA2G4 PE=1 SV=3	Q9UQ80 [254-260]	1	138.8	149.7	142.8	67.7	50.6	50.5	0.391375	-1.35338	0.000180843	95	3.7427	0.000869951	3.06051
[K].DLGYGKGYK.[Y]	1xBiotin [K6]	Q96S55 1xBiotin [K633]	1	Q96S55	DDB1- and CUL4-associated factor 13 OS=Homo sapiens OX=9606 GN=DCAF13 PE=1 SV=2	Q9NV06 [44-52]	1	129.7	128.5	173.4	22.5	38.7	107.3	0.390408	-1.35695	0.0426595	320	1.36998	0.0609231	1.21522
[R].NVMILTNPVAAKK.[N]	1xBiotin [K13]; 1xOxidation [M3]	Q9UGI8 1xBiotin [K102]	3	Q9UGI8	RNA-binding protein 26 OS=Homo sapiens OX=9606 GN=RBM26 PE=1 SV=3	Q5T8P6 [516-524]	1	187	116	129.2	68.3	65.9	33.6	0.388246	-1.36496	0.0228293	300	1.64151	0.0347767	1.45871
[R].KCSTPEEIK.[K]	1xBiotin [K1]; 1xCarbamidomethyl [C2]	P60981 1xBiotin [K22]	1	P60981	Serum response factor-binding protein 1 OS=Homo sapiens OX=9606 GN=SRFBP1 PE=1 SV=1	Q8NEF9 [412-424]	1	163.2	137.7	131.7	62.7	75.5	29.2	0.386963	-1.36973	0.006308	245	2.20011	0.0117663	1.92936
[M].AAANKGNKPR.[V]	1xAcetyl [N-Term]; 1xBiotin [K5]	Q9GZN8 1xAcetyl [N-Term]; 1xBiotin [K6]	1	Q9GZN8	Protein Red OS=Homo sapiens OX=9606 GN=IK PE=1 SV=3	Q13123 [502-514]	1	145	151.6	136.8	91.1	38.5	37	0.384402	-1.37931	0.00827512	258	2.08223	0.0146579	1.83393
[K].KTAMAAAK.[A]	1xBiotin [K1]	P83731 1xBiotin [K124]	1	P83731	Non-POU domain-containing octamer-binding protein OS=Homo sapiens OX=9606 GN=NONO PE=1 SV=4	Q15233 [457-468]	1	160.8	189.3	83.5	56.1	89.8	20.4	0.383533	-1.38258	0.0759122	350	1.11969	0.0991196	1.00384
[K].TVCDAAEKGVR.[T]	1xBiotin [K8]; 1xCarbamidomethyl [C3]	O60664 1xBiotin [K65]	3	O60664	E3 ubiquitin-protein ligase RAD18 OS=Homo sapiens OX=9606 GN=RAD18 PE=1 SV=2	Q9NS91 [364-376]	1	137.8	160.8	137.2	38.4	49.3	76.5	0.376778	-1.40821	0.0027452	202	2.56143	0.00621068	2.20686
[K].TITGKTFSSR.[-]	1xBiotin [K5]	O15144 1xBiotin [K295]	3	O15144	Eukaryotic translation initiation factor 4B OS=Homo sapiens OX=9606 GN=EIF4B PE=1 SV=2	P23588 [390-398]	1	130.2	152.2	154.4	119.3	29.5	14.4	0.373626	-1.42033	0.0534818	333	1.27179	0.073397	1.13432
[K].YSWVLKTK.[T]	1xBiotin [K8]	Q96DT6 1xBiotin [K32]	1	Q96DT6	Lamina-associated polypeptide 2, isoforms beta/gamma OS=Homo sapiens OX=9606 GN=TMPO PE=1 SV=2	P42167 [298-319]	1	138.7	134.4	163.8	26.8	110.9	25.4	0.373312	-1.42155	0.0372569	311	1.42879	0.0547473	1.26164
[K].LPKGISAGAVQTAGK.[K]	1xBiotin [K3]	P46087 1xBiotin [K79]	1	P46087	60S ribosomal protein L24 OS=Homo sapiens OX=9606 GN=RPL24 PE=1 SV=1	P83731 [142-152]	1	145.4	151.7	140.5	40.1	39.7	82.7	0.371344	-1.42917	0.00330682	213	2.48059	0.00709491	2.14905
[K].VPAQKATGQK.[A]	1xBiotin [K5]	P50914 1xBiotin [K182]	2	P50914	60S ribosomal protein L14 OS=Homo sapiens OX=9606 GN=RPL14 PE=1 SV=4	P50914 [178-187]	1	148.8	153.6	138.8	72.7	55.1	31.1	0.360154	-1.47331	0.00183419	176	2.73655	0.00476265	2.32215
[K].KGTVEGFEPADNK.[C]	1xBiotin [K1]	P37108 1xBiotin [K43]	3	P37108	Microtubule-associated protein 4 OS=Homo sapiens OX=9606 GN=MAP4 PE=1 SV=3	P27816 [313-321]	1	173.3	142.8	125.4	47.7	63.5	47.3	0.359003	-1.47793	0.00325034	212	2.48807	0.00700663	2.15449
[R].TLDSGTSEIVKSPR.[I]	1xBiotin [K11]	Q9H501 1xBiotin [K197]	3	Q9H501	Signal recognition particle 14 kDa protein OS=Homo sapiens OX=9606 GN=SRP14 PE=1 SV=2	P37108 [43-55]	1	147	156.5	138.6	52.8	50.1	55	0.357159	-1.48536	6.0251e-05	60	4.22004	0.000458912	3.33827
[K].IVKPVKVSAPR.[V]	1xBiotin [K6]	P83731 1xBiotin [K147]	3	P83731	NF-kappa-B inhibitor-interacting Ras-like protein 2 OS=Homo sapiens OX=9606 GN=NKIRAS2 PE=1 SV=1	Q9NYR9 [168-181]	1	154.5	147.1	140.9	45.2	54.5	57.8	0.355932	-1.49033	6.35066e-05	64	4.19718	0.000453477	3.34344
[K].IKIIAPPER.[K]	1xBiotin [K2]	P60709 1xBiotin [K328]	1	P60709	Testin OS=Homo sapiens OX=9606 GN=TES PE=1 SV=1	Q9UGI8 [90-102]	1	151.1	123	169.8	52	42.7	61.2	0.351205	-1.50961	0.00277704	203	2.55642	0.00625175	2.204
[R].ARPPSGSSKATDLGGTSQAGTSQR.[F]	1xBiotin [K9]	Q7Z2W4 1xBiotin [K314]	1	Q7Z2W4	Zinc finger protein 280C OS=Homo sapiens OX=9606 GN=ZNF280C PE=1 SV=1	Q8ND82 [164-174]	1	252.8	41.1	150.2	44.5	42.6	68.7	0.350822	-1.51119	0.19432	388	0.711482	0.228877	0.640398
[R].EDSVKPGAHLTVKK.[I]	1xBiotin [K14]	P51991 1xBiotin [K127]	2	P51991	CDK5 regulatory subunit-associated protein 3 OS=Homo sapiens OX=9606 GN=CDK5RAP3 PE=1 SV=2	Q96JB5 [77-88]	1	141.2	153.6	149.7	88.5	31.4	35.5	0.349606	-1.5162	0.00679206	247	2.168	0.0125667	1.90078
[K].TAEGHPKSLFIGEK.[A]	1xBiotin [K7]	P42696 1xBiotin [K399]	2	P42696	Phosphoglycerate mutase 1 OS=Homo sapiens OX=9606 GN=PGAM1 PE=1 SV=2	P18669 [242-253]	1	139.3	159.8	147.3	26	51.1	76.7	0.344534	-1.53728	0.00350163	216	2.45573	0.00740854	2.13027
[K].MTQPQSKSAFPLSR.[K]	1xBiotin [K7]	Q9NYR9 1xBiotin [K174]	2	Q9NYR9	ESF1 homolog OS=Homo sapiens OX=9606 GN=ESF1 PE=1 SV=1	Q9H501 [187-200]	1	150.8	162.6	133.3	19.8	55.2	78.4	0.343407	-1.54201	0.00682312	250	2.16602	0.0124727	1.90404
[R].TNSGGGDGPHISSKVR.[V]	1xBiotin [K14]	Q96EV2 1xBiotin [K984]	2	Q96EV2	Perilipin-3 OS=Homo sapiens OX=9606 GN=PLIN3 PE=1 SV=3	O60664 [58-68]	1	170	144.2	133.2	68.6	24.4	59.7	0.341305	-1.55087	0.00479952	234	2.3188	0.00937342	2.0281
[K].TVTPAKAVTTPGKK.[G]	1xBiotin [K6]	P19338 1xBiotin [K102]	1	P19338	Peptidyl-prolyl cis-trans isomerase FKBP3 OS=Homo sapiens OX=9606 GN=FKBP3 PE=1 SV=1	Q00688 [81-89]	1	112	201.1	135.3	34.4	46.2	70.9	0.337868	-1.56547	0.0262791	304	1.58039	0.0395051	1.40335
[R].EESGKPGAHVTVKK.[L]	1xBiotin [K14]	P22626 1xBiotin [K113]	3	P22626	60S ribosomal protein L24 OS=Homo sapiens OX=9606 GN=RPL24 PE=1 SV=1	P83731 [124-131]	1	155.1	157.3	136.3	26.4	36.5	88.4	0.337196	-1.56834	0.00818167	257	2.08716	0.0145487	1.83718
[R].ALSSSKQSSSSR.[D]	1xBiotin [K6]	P53999 1xBiotin [K53]	1	P53999	Actin, cytoplasmic 1 OS=Homo sapiens OX=9606 GN=ACTB PE=1 SV=1	P60709 [327-335]	1	155.2	162.4	131.3	33.8	72.1	45.2	0.336601	-1.57089	0.00253292	196	2.59638	0.00590583	2.22872
[K].AAATPAKK.[T]	1xBiotin [K8]	P19338 1xBiotin [K96]	1	P19338	Splicing factor 45 OS=Homo sapiens OX=9606 GN=RBM17 PE=1 SV=1	Q96I25 [274-285]	1	141.6	170.6	136.9	68.6	36.9	45.3	0.335783	-1.5744	0.00217538	187	2.66246	0.0053163	2.27439
[R].TNSPGFQKK.[V]	1xBiotin [K9]	Q5T8P6 1xBiotin [K524]	2	Q5T8P6	RNA-binding protein 34 OS=Homo sapiens OX=9606 GN=RBM34 PE=1 SV=2	P42696 [393-406]	1	148.3	156.6	144.6	65.6	58.8	26.2	0.335039	-1.5776	0.00141176	166	2.85024	0.00388658	2.41043
[R].QLDEPKLER.[R]	1xBiotin [K6]	P23588 1xBiotin [K395]	1	P23588	Nucleolin OS=Homo sapiens OX=9606 GN=NCL PE=1 SV=3	P19338 [97-110]	2	161.2	142.7	145.7	27.4	61.1	61.9	0.33452	-1.57984	0.00143438	167	2.84334	0.00392522	2.40614
[M].PEPTKSAPAPK.[K]	1xBiotin [K5]	P58876 1xBiotin [K6]	3	P58876	La-related protein 1 OS=Homo sapiens OX=9606 GN=LARP1 PE=1 SV=2	Q6PKG0 [1084-1096]	0	153.4	154.8	142	20.2	62.7	66.9	0.332741	-1.58753	0.00292627	208	2.53369	0.00642936	2.19183
[K].GTEASTKNIFGR.[Y]	1xBiotin [K7]	Q96JB5 1xBiotin [K83]	3	Q96JB5	Nucleolin OS=Homo sapiens OX=9606 GN=NCL PE=1 SV=3	P19338 [89-96]	1	133	146.5	173.3	68.2	52.7	26.3	0.325088	-1.6211	0.00392238	222	2.40645	0.00807444	2.09289
[K].AQKIEMDKLEK.[A]	1xBiotin [K3]	Q9UHR5 1xBiotin [K205]	6	Q9UHR5	Elongin-A OS=Homo sapiens OX=9606 GN=ELOA PE=1 SV=2	Q14241 [780-789]	1	133.9	164.6	155.9	59.8	44.2	41.5	0.320202	-1.64294	0.000668553	142	3.17486	0.00215161	2.66724
[K].ASKALEVSEDVK.[V]	1xBiotin [K3]	Q9UNF1 1xBiotin [K47]	3	Q9UNF1	E3 ubiquitin-protein ligase TRIM33 OS=Homo sapiens OX=9606 GN=TRIM33 PE=1 SV=3	Q9UPN9 [760-769]	1	142.6	152.3	160.1	16.6	62.6	65.8	0.318681	-1.64981	0.003452	215	2.46193	0.00733752	2.13445
[R].VTGNFKHASPILPITEFSDIPR.[R]	1xBiotin [K6]	P42167 1xBiotin [K303]	3	P42167	SAP30-binding protein OS=Homo sapiens OX=9606 GN=SAP30BP PE=1 SV=1	Q9UHR5 [203-213]	2	131	102.3	221.8	39	50.3	55.6	0.318392	-1.65113	0.0466405	325	1.33124	0.0655837	1.1832
[K].TAMAAAKAPTK.[A]	1xBiotin [K7]	P83731 1xBiotin [K131]	3	P83731	Treacle protein OS=Homo sapiens OX=9606 GN=TCOF1 PE=1 SV=3	Q13428 [812-822]	1	261.5	35.3	158.4	38.6	35.3	70.9	0.318102	-1.65244	0.193976	387	0.712251	0.229062	0.640046
[K].NEATVSTGKIAK.[G]	1xBiotin [K12]	Q9Y450 1xBiotin [K143]	2	Q9Y450	Replication protein A 70 kDa DNA-binding subunit OS=Homo sapiens OX=9606 GN=RPA1 PE=1 SV=2	P27694 [158-167]	1	258.7	160.7	36.1	38.6	47.2	58.8	0.317453	-1.65538	0.184345	385	0.734368	0.21882	0.659912
[K].IAPMMAKTIK.[A]	1xBiotin [K7]	Q14241 1xBiotin [K786]	2	Q14241	40S ribosomal protein S3a OS=Homo sapiens OX=9606 GN=RPS3A PE=1 SV=2	P61247 [241-252]	1	131.1	178.6	146.4	47.5	41.1	55.4	0.31572	-1.66328	0.00204883	181	2.68849	0.00517301	2.28626
[K].IAGMSQKTVTITK.[E]	1xBiotin [K7]	Q9NS91 1xBiotin [K370]	2	Q9NS91	Small nuclear ribonucleoprotein Sm D2 OS=Homo sapiens OX=9606 GN=SNRPD2 PE=1 SV=1	P62316 [112-118]	0	163.6	143.2	149.3	64.4	57.9	21.6	0.315501	-1.66428	0.00206102	183	2.68592	0.00514692	2.28845
[K].ETAGLKVGVSSR.[I]	1xBiotin [K6]	Q05682 1xBiotin [K739]	2	Q05682	General transcription factor II-I OS=Homo sapiens OX=9606 GN=GTF2I PE=1 SV=2	P78347 [745-756]	1	127	167.9	161.9	34	70.5	38.7	0.313485	-1.67353	0.00366221	218	2.43626	0.0076772	2.1148
[R].AEVLGHKTPEPAPR.[R]	1xBiotin [K7]	Q9UHD8 1xBiotin [K141]	1	Q9UHD8	Dynactin subunit 2 OS=Homo sapiens OX=9606 GN=DCTN2 PE=1 SV=4	Q13561 [62-72]	1	327.8	56.7	73	17.1	53.5	71.9	0.311475	-1.68281	0.304596	406	0.516276	0.342858	0.464885
[K].EVALVKDVR.[W]	1xBiotin [K6]	P27816 1xBiotin [K318]	3	P27816	ETS-related transcription factor Elf-2 OS=Homo sapiens OX=9606 GN=ELF2 PE=1 SV=2	Q15723 [339-350]	1	139.1	121.6	198.7	73.2	50.9	16.5	0.306051	-1.70815	0.0204966	293	1.68832	0.0319691	1.49527
[K].VVTAAAQAKQR.[S]	1xBiotin [K9]	Q13428 1xBiotin [K820]	1	Q13428	Septin-9 OS=Homo sapiens OX=9606 GN=SEPTIN9 PE=1 SV=2	Q9UHD8 [135-148]	1	143.1	157	159.3	61.6	30.3	48.6	0.305834	-1.70918	0.000515125	131	3.28809	0.00179704	2.74544
[K].TAEAGGVTGKGQDGIGSK.[A]	1xBiotin [K10]	P09874 1xBiotin [K97]	2	P09874	ATPase WRNIP1 OS=Homo sapiens OX=9606 GN=WRNIP1 PE=1 SV=2	Q96S55 [628-636]	1	284.4	128.5	46.7	35.7	83.3	21.5	0.305701	-1.70981	0.214594	393	0.668383	0.24954	0.60286
[K].DKSGIIPQTR.[E]	1xBiotin [K2]	Q8WTT2 1xBiotin [K158]	2	Q8WTT2	Zinc finger protein Rlf OS=Homo sapiens OX=9606 GN=RLF PE=1 SV=2	Q13129 [1479-1486]	1	158.6	159.8	141.2	37	41.1	62.3	0.305483	-1.71084	0.000421291	117	3.37542	0.00164556	2.78369
[R].RQQEGFKGTFPDAR.[E]	1xBiotin [K7]	Q15233 1xBiotin [K371]	7	Q15233	Zinc finger CCCH-type antiviral protein 1 OS=Homo sapiens OX=9606 GN=ZC3HAV1 PE=1 SV=3	Q7Z2W4 [306-329]	1	128.5	154	177.2	44	51	45.3	0.305199	-1.71218	0.00170509	175	2.76825	0.00445271	2.35138
[K].VSEQVKNVK.[L]	1xBiotin [K6]	Q00688 1xBiotin [K86]	1	Q00688	RNA polymerase II-associated factor 1 homolog OS=Homo sapiens OX=9606 GN=PAF1 PE=1 SV=2	Q8N7H5 [133-143]	1	175	143.6	141.1	50.9	64.4	25	0.305199	-1.71218	0.00258378	198	2.58775	0.00596356	2.22449
[K].CGEALGLKQAVK.[V]	1xBiotin [K8]; 1xCarbamidomethyl [C1]	P78347 1xBiotin [K752]	3	P78347	Non-POU domain-containing octamer-binding protein OS=Homo sapiens OX=9606 GN=NONO PE=1 SV=4	Q15233 [365-378]	2	172.1	148.6	139.4	43.9	43.7	52.3	0.304064	-1.71755	0.000460688	124	3.33659	0.00169786	2.7701
[K].ATGDETGAKVER.[A]	1xBiotin [K9]	P61247 1xBiotin [K249]	3	P61247	HBS1-like protein OS=Homo sapiens OX=9606 GN=HBS1L PE=1 SV=1	Q9Y450 [132-143]	1	181.2	143.4	136.4	55.9	55.3	27.8	0.301518	-1.72968	0.00302567	209	2.51918	0.00661594	2.17941
[R].GGKIIVGDATEK.[D]	1xBiotin [K3]	Q96I25 1xBiotin [K276]	3	Q96I25	Poly [ADP-ribose] polymerase 1 OS=Homo sapiens OX=9606 GN=PARP1 PE=1 SV=4	P09874 [88-105]	1	174.6	138.9	148.1	51.3	16.4	70.6	0.29961	-1.73884	0.00488887	236	2.31079	0.00946701	2.02379
[R].MVNKAADAVNK.[M]	1xBiotin [K4]	O60749 1xBiotin [K287]	3	O60749	Non-POU domain-containing octamer-binding protein OS=Homo sapiens OX=9606 GN=NONO PE=1 SV=4	Q15233 [366-378]	1	183	174.2	106.2	23.6	78.5	34.5	0.294778	-1.7623	0.0209785	296	1.67822	0.0323892	1.4896
[R].NPLIAGK.[-]	1xBiotin [K7]	P62316 1xBiotin [K118]	1	P62316	THO complex subunit 2 OS=Homo sapiens OX=9606 GN=THOC2 PE=1 SV=2	Q8NI27 [1512-1526]	1	185.5	147.7	130.8	46.2	44.4	45.4	0.293103	-1.77052	0.00250046	194	2.60198	0.00589026	2.22987
[K].GNQKLEQFR.[V]	1xBiotin [K4]	Q8TA86 1xBiotin [K129]	2	Q8TA86	Poly [ADP-ribose] polymerase 1 OS=Homo sapiens OX=9606 GN=PARP1 PE=1 SV=4	P09874 [98-108]	1	156.6	181.6	127	34.5	71.7	28.5	0.289553	-1.7881	0.00607489	244	2.21646	0.011378	1.94393
[R].TAEKTSLSFK.[S]	1xBiotin [K4]	Q9UPN9 1xBiotin [K763]	3	Q9UPN9	Activated RNA polymerase II transcriptional coactivator p15 OS=Homo sapiens OX=9606 GN=SUB1 PE=1 SV=3	P53999 [48-59]	1	155.1	154.3	157.1	15.9	48.3	69.4	0.286388	-1.80396	0.00205452	182	2.68729	0.00515888	2.28744
[K].AQKIEMDK.[L]	1xBiotin [K3]; 1xOxidation [M6]	Q9UHR5 1xBiotin [K205]	2	Q9UHR5	THO complex subunit 2 OS=Homo sapiens OX=9606 GN=THOC2 PE=1 SV=2	Q8NI27 [1385-1397]	1	179.3	127	160.3	36.3	56.2	40.8	0.285684	-1.80751	0.00249442	195	2.60303	0.00584589	2.23315
[R].QQEGFKGTFPDAR.[E]	1xBiotin [K6]	Q15233 1xBiotin [K371]	24	Q15233	SAP30-binding protein OS=Homo sapiens OX=9606 GN=SAP30BP PE=1 SV=1	Q9UHR5 [203-210]	1	136.3	148.8	181.7	43.3	40.3	49.6	0.285347	-1.80921	0.00129309	164	2.88837	0.00360331	2.4433
[K].AYGASKTFGK.[A]	1xBiotin [K6]	P27694 1xBiotin [K163]	1	P27694	Heterogeneous nuclear ribonucleoprotein A1 OS=Homo sapiens OX=9606 GN=HNRNPA1 PE=1 SV=5	P09651 [2-8]	1	64.6	151.2	251.2	53.8	20	59.2	0.284797	-1.812	0.114329	359	0.941842	0.145539	0.837021
[R].VGTKGLDFSDR.[I]	1xBiotin [K4]	Q13561 1xBiotin [K65]	3	Q13561	E3 ubiquitin-protein ligase RBBP6 OS=Homo sapiens OX=9606 GN=RBBP6 PE=1 SV=1	Q7Z6E9 [82-91]	1	184.8	131.7	150.7	27	60	45.8	0.284247	-1.81479	0.00362847	217	2.44028	0.00764152	2.11682
[K].HKSESPCESPYPNEK.[D]	1xBiotin [K2]; 1xCarbamidomethyl [C7]	Q8NI27 1xBiotin [K1513]	5	Q8NI27	Heat shock protein HSP 90-alpha OS=Homo sapiens OX=9606 GN=HSP90AA1 PE=1 SV=5	P07900 [613-620]	1	176.7	139.9	151.3	30.7	50	51.4	0.282325	-1.82457	0.000932068	155	3.03055	0.0027481	2.56097
[K].DFSGDMCKLK.[W]	1xBiotin [K8]; 1xCarbamidomethyl [C7]	P17480 1xBiotin [K69]	3	P17480	Probable 28S rRNA (cytosine(4447)-C(5))-methyltransferase OS=Homo sapiens OX=9606 GN=NOP2 PE=1 SV=2	P46087 [77-91]	1	154.9	133.3	179.7	36.6	31.4	64	0.282112	-1.82566	0.00262833	200	2.58032	0.00600573	2.22143
[M].SKSESPK.[E]	1xAcetyl [N-Term]; 1xBiotin [K2]	P09651 1xAcetyl [N-Term]; 1xBiotin [K3]	10	P09651	Splicing factor 3B subunit 1 OS=Homo sapiens OX=9606 GN=SF3B1 PE=1 SV=3	O75533 [133-146]	1	172.8	152.8	143	44.4	37.8	49.2	0.28041	-1.83439	0.000276915	104	3.55765	0.00121683	2.91477
[R].APKVEPVGDVVSTR.[D]	1xBiotin [K3]	P46013 1xBiotin [K2967]	3	P46013	Protein FAM50A OS=Homo sapiens OX=9606 GN=FAM50A PE=1 SV=2	Q14320 [26-34]	1	159.2	149.5	160.6	37.9	66.9	25.8	0.278287	-1.84536	0.000880448	152	3.0553	0.00264714	2.57722
[K].STSKTYVISR.[T]	1xBiotin [K4]	Q7Z6E9 1xBiotin [K85]	3	Q7Z6E9	Teashirt homolog 3 OS=Homo sapiens OX=9606 GN=TSHZ3 PE=1 SV=2	Q63HK5 [853-871]	1	174.3	151.9	144.3	42.7	43.7	43.1	0.275239	-1.86124	0.000227208	99	3.64358	0.00104883	2.97929
[R].LDPFADGGKTPDPK.[M]	1xBiotin [K9]	O75533 1xBiotin [K141]	13	O75533	60S ribosomal protein L24 OS=Homo sapiens OX=9606 GN=RPL24 PE=1 SV=1	P83731 [125-135]	1	136.2	137.7	197.1	54.5	44.6	30	0.274098	-1.86724	0.00586335	243	2.23185	0.011027	1.95754
[M].SALEKSMHLGR.[L]	1xAcetyl [N-Term]; 1xBiotin [K5]; 1xOxidation [M7]	Q9Y570 1xAcetyl [N-Term]; 1xBiotin [K6]	3	Q9Y570	Nuclear pore complex protein Nup50 OS=Homo sapiens OX=9606 GN=NUP50 PE=1 SV=2	Q9UKX7 [60-72]	1	196.9	125.3	148.8	21.2	85.5	22.2	0.273673	-1.86947	0.0189599	286	1.72216	0.0302961	1.51861
[K].IPSTPKLIPK.[V]	1xBiotin [K6]	Q9HC35 1xBiotin [K203]	2	Q9HC35	Histone H3.3 OS=Homo sapiens OX=9606 GN=H3F3A PE=1 SV=2	P84243 [20-27]	1	164.9	151.9	154.7	33.8	80.2	14.5	0.272534	-1.87549	0.00454244	233	2.34271	0.00890942	2.05015
[R].EQMEQMKQR.[I]	1xBiotin [K7]	Q14320 1xBiotin [K32]	3	Q14320	UPF0687 protein C20orf27 OS=Homo sapiens OX=9606 GN=C20orf27 PE=1 SV=3	Q9GZN8 [2-11]	1	163.8	151.3	156.5	38.6	45.1	44.7	0.272265	-1.87692	1.07139e-05	26	4.97005	0.000188318	3.72511
[K].AFSIGKMSTAK.[R]	1xBiotin [K6]; 1xOxidation [M7]	O15042 1xBiotin [K88]	3	O15042	Paraspeckle component 1 OS=Homo sapiens OX=9606 GN=PSPC1 PE=1 SV=1	Q8WXF1 [12-18]	1	189.6	122.2	160.1	64.7	26.8	36.8	0.27188	-1.87896	0.00710065	253	2.1487	0.0128261	1.89191
[R].SGKNSSPINCSR.[A]	1xBiotin [K3]; 1xCarbamidomethyl [C10]	Q15723 1xBiotin [K341]	2	Q15723	Caldesmon OS=Homo sapiens OX=9606 GN=CALD1 PE=1 SV=3	Q05682 [734-745]	1	151.3	155.6	165.1	25.6	47.2	55.2	0.271186	-1.88264	0.000297289	107	3.52682	0.00126973	2.89629
[K].SLVSKGTLVQTK.[G]	1xBiotin [K5]	P16403 1xBiotin [K90]	2	P16403	Treacle protein OS=Homo sapiens OX=9606 GN=TCOF1 PE=1 SV=3	Q13428 [799-811]	1	169.3	131.3	171.6	35	39.2	53.5	0.270436	-1.88664	0.00127609	161	2.89412	0.00362221	2.44103
[R].KTEYISTEFNR.[Y]	1xBiotin [K1]	Q8N7H5 1xBiotin [K133]	2	Q8N7H5	Histone H1.2 OS=Homo sapiens OX=9606 GN=HIST1H1C PE=1 SV=2	P16403 [86-97]	1	151.8	150.8	170.5	44.8	50.6	31.6	0.268442	-1.89732	0.000172438	91	3.76337	0.000865982	3.06249
[R].KSSTPEEVK.[K]	1xBiotin [K1]	P23528 1xBiotin [K22]	3	P23528	Nucleolar complex protein 3 homolog OS=Homo sapiens OX=9606 GN=NOC3L PE=1 SV=1	Q8WTT2 [157-166]	1	198.7	142.1	132.3	31.5	50.8	44.6	0.268231	-1.89845	0.0057804	242	2.23804	0.0109159	1.96194
[R].APSAKGTISAPGK.[V]	1xBiotin [K5]	Q13428 1xBiotin [K803]	3	Q13428	Adenylosuccinate synthetase isozyme 2 OS=Homo sapiens OX=9606 GN=ADSS PE=1 SV=3	P30520 [164-173]	1	140.5	160	172.8	32	52	42.7	0.267695	-1.90134	0.000468914	126	3.32891	0.00170074	2.76936
[K].SPKTVSPPIR.[K]	1xBiotin [K3]	Q9UHB6 1xBiotin [K606]	3	Q9UHB6	Craniofacial development protein 1 OS=Homo sapiens OX=9606 GN=CFDP1 PE=1 SV=1	Q9UEE9 [238-245]	1	166.5	170.5	136.4	59.7	27.4	39.5	0.267427	-1.90278	0.0012735	162	2.895	0.00359253	2.4446
[K].IESQKLNFK.[E]	1xBiotin [K5]	P27816 1xBiotin [K1060]	1	P27816	Cofilin-1 OS=Homo sapiens OX=9606 GN=CFL1 PE=1 SV=3	P23528 [22-30]	1	164.4	152	157.4	32.7	79.1	14.3	0.266146	-1.90971	0.00410334	223	2.38686	0.00840909	2.07525
[K].GQDGIGSKAEK.[T]	1xBiotin [K8]	P09874 1xBiotin [K105]	2	P09874	Probable ATP-dependent RNA helicase DDX46 OS=Homo sapiens OX=9606 GN=DDX46 PE=1 SV=2	Q7L014 [257-271]	1	164.2	149.3	160.4	47.2	47.7	31.2	0.26609	-1.91001	7.89224e-05	72	4.1028	0.000500938	3.30022
[R].IEKNPAR.[L]	1xBiotin [K3]	Q8WXF1 1xBiotin [K14]	3	Q8WXF1	Elongation factor 1-alpha 1 OS=Homo sapiens OX=9606 GN=EEF1A1 PE=1 SV=1	P68104 [451-457]	1	176.5	162.2	138	30.7	47.5	45.1	0.258653	-1.95091	0.000685261	143	3.16414	0.00218996	2.65956
[K].NLTESHTSKSSTPSSISEK.[S]	1xBiotin [K9]	Q63HK5 1xBiotin [K861]	3	Q63HK5	Histone acetyltransferase type B catalytic subunit OS=Homo sapiens OX=9606 GN=HAT1 PE=1 SV=1	O14929 [10-20]	1	164.5	169.3	143	19.5	58.5	45.2	0.258389	-1.95238	0.00109407	158	2.96095	0.0031645	2.49969
[K].FLVEYKSAVEK.[K]	1xBiotin [K6]	O14929 1xBiotin [K15]	2	O14929	Protein FAM50A OS=Homo sapiens OX=9606 GN=FAM50A PE=1 SV=2	Q14320 [333-339]	1	92.5	158.5	226	39.4	47.9	35.7	0.257862	-1.95533	0.0380847	313	1.41925	0.0556062	1.25488
[K].TPVSGSLKSPVPR.[S]	1xBiotin [K8]	Q8NI27 1xBiotin [K1392]	3	Q8NI27	Proliferation marker protein Ki-67 OS=Homo sapiens OX=9606 GN=MKI67 PE=1 SV=2	P46013 [2965-2978]	1	159.3	161.3	156.5	46.9	46.2	29.7	0.257388	-1.95798	3.41174e-05	42	4.46702	0.00037123	3.43036
[K].MSTLEKSK.[L]	1xBiotin [K6]	Q9UEE9 1xBiotin [K243]	3	Q9UEE9	Remodeling and spacing factor 1 OS=Homo sapiens OX=9606 GN=RSF1 PE=1 SV=2	Q96T23 [401-411]	1	150.2	167.9	160.9	35.4	42.9	42.7	0.25261	-1.98502	3.09239e-05	39	4.50971	0.000362364	3.44085
[K].KGIGPVYSSK.[A]	1xBiotin [K1]	P30520 1xBiotin [K164]	3	P30520	Heterogeneous nuclear ribonucleoprotein A3 OS=Homo sapiens OX=9606 GN=HNRNPA3 PE=1 SV=2	P51991 [114-127]	1	174	152.5	153.1	39.7	58.7	22	0.251043	-1.994	0.000713858	144	3.14639	0.00226551	2.64483
[R].SQKVANER.[L]	1xBiotin [K3]	Q13129 1xBiotin [K1481]	3	Q13129	LIM domain and actin-binding protein 1 OS=Homo sapiens OX=9606 GN=LIMA1 PE=1 SV=1	Q9UHB6 [604-613]	1	152.1	191.4	136.9	56.9	48.5	14.1	0.248751	-2.00723	0.00448588	232	2.34815	0.00883641	2.05372
[K].VAKMTVSGK.[K]	1xBiotin [K3]	Q9Y450 1xBiotin [K164]	2	Q9Y450	Nucleolar transcription factor 1 OS=Homo sapiens OX=9606 GN=UBTF PE=1 SV=1	P17480 [62-71]	1	201.5	140.1	139	66.5	30.1	22.7	0.248231	-2.01024	0.00817719	256	2.0874	0.0145976	1.83572
[K].QPVGGGQKLLTR.[K]	1xBiotin [K8]	Q14978 1xBiotin [K415]	4	Q14978	Heterogeneous nuclear ribonucleoproteins A2/B1 OS=Homo sapiens OX=9606 GN=HNRNPA2B1 PE=1 SV=2	P22626 [100-113]	1	185.2	144.9	152.4	21.3	5.2	91	0.243523	-2.03787	0.0138958	282	1.85712	0.022519	1.64745
[K].VTKSAQK.[A]	1xBiotin [K3]	P68104 1xBiotin [K453]	1	P68104	Nucleophosmin OS=Homo sapiens OX=9606 GN=NPM1 PE=1 SV=2	P06748 [198-206]	1	122.3	250.4	111.1	28.1	43.9	44.2	0.240182	-2.0578	0.0528219	332	1.27719	0.0727097	1.13841
[K].QLATKAAR.[K]	1xBiotin [K5]	P84243 1xBiotin [K24]	3	P84243	H(+)/Cl(-) exchange transporter 7 OS=Homo sapiens OX=9606 GN=CLCN7 PE=1 SV=2	P51798 [2-7]	1	208	146.1	131.6	56.1	47.5	10.8	0.235536	-2.08598	0.0104625	268	1.98036	0.017841	1.74858
[R].IMKAQALR.[D]	1xBiotin [K3]	P07900 1xBiotin [K615]	3	P07900	U2 snRNP-associated SURP motif-containing protein OS=Homo sapiens OX=9606 GN=U2SURP PE=1 SV=2	O15042 [83-93]	1	165.9	160.1	160	10.3	58.3	45.4	0.234568	-2.09192	0.00101942	156	2.99165	0.00298637	2.52486
[R].VTKEVDATSK.[E]	1xBiotin [K3]	Q9UEE9 1xBiotin [K180]	3	Q9UEE9	Pyridoxal phosphate homeostasis protein OS=Homo sapiens OX=9606 GN=PLPBP PE=1 SV=1	O94903 [251-260]	1	177.7	153.9	154.9	32	46.8	34.7	0.233299	-2.09975	0.000159563	90	3.79707	0.000810226	3.09139
[K].VEAKFINYVK.[N]	1xBiotin [K4]	P06748 1xBiotin [K267]	3	P06748	Retinitis pigmentosa 9 protein OS=Homo sapiens OX=9606 GN=RP9 PE=1 SV=2	Q8TA86 [126-134]	1	161.3	164.4	161.1	44.5	34.3	34.4	0.232539	-2.10446	3.93221e-06	15	5.40536	0.000119801	3.92154
[R].DYSKKPTPDK.[C]	1xBiotin [K]	O94903 1xBiotin [K]	5	O94903	Nucleolin OS=Homo sapiens OX=9606 GN=NCL PE=1 SV=3	P19338 [126-135]	1	162.4	164.9	159.6	48.6	36.5	28	0.232286	-2.10603	3.54897e-05	43	4.4499	0.000377182	3.42345
[M].ANVSKK.[V]	1xAcetyl [N-Term]; 1xBiotin [K6]	P51798 1xAcetyl [N-Term]; 1xBiotin [K7]	1	P51798	Craniofacial development protein 1 OS=Homo sapiens OX=9606 GN=CFDP1 PE=1 SV=1	Q9UEE9 [178-187]	1	74.1	178.5	234.7	31.6	27	54.1	0.231274	-2.11232	0.0592483	342	1.22732	0.079171	1.10143
[K].TQPTSLPKQPAPTTIGGLNK.[K]	1xBiotin [K8]	P27816 1xBiotin [K726]	2	P27816	Delta(14)-sterol reductase LBR OS=Homo sapiens OX=9606 GN=LBR PE=1 SV=2	Q14739 [187-195]	1	156.7	127.4	204.5	11.8	67.5	32	0.227794	-2.1342	0.0105567	269	1.97647	0.0179347	1.74631
[K].SGPTVTKVVTVVTTK.[K]	1xBiotin [K7]	Q7L014 1xBiotin [K263]	3	Q7L014	Sorting nexin-2 OS=Homo sapiens OX=9606 GN=SNX2 PE=1 SV=2	O60749 [284-294]	1	184.2	143.8	160.8	40.9	21.6	48.6	0.227291	-2.13739	0.000893789	153	3.04877	0.00266968	2.57354
[K].GPLCKSVTPTK.[E]	1xBiotin [K5]; 1xCarbamidomethyl [C4]	Q96T23 1xBiotin [K405]	3	Q96T23	26S proteasome non-ATPase regulatory subunit 6 OS=Homo sapiens OX=9606 GN=PSMD6 PE=1 SV=1	Q15008 [372-379]	1	144.4	167.2	177.7	52.4	18.7	39.6	0.226242	-2.14406	0.000814798	150	3.08895	0.00248242	2.60513
[K].WDKYTIR.[-]	1xBiotin [K3]	Q14320 1xBiotin [K335]	2	Q14320	Echinoderm microtubule-associated protein-like 4 OS=Homo sapiens OX=9606 GN=EML4 PE=1 SV=3	Q9HC35 [198-207]	1	171.9	141.1	176.5	41.3	21.8	47.4	0.225741	-2.14726	0.000732731	146	3.13506	0.00229355	2.63949
[R].DTPAKNAQK.[S]	1xBiotin [K5]	P06748 1xBiotin [K202]	2	P06748	Thyroid hormone receptor-associated protein 3 OS=Homo sapiens OX=9606 GN=THRAP3 PE=1 SV=2	Q9Y2W1 [374-387]	1	149.2	200.4	140.4	18.2	56.8	34.9	0.224286	-2.15659	0.00435539	228	2.36097	0.00872989	2.05899
[K].YVAKELAVR.[T]	1xBiotin [K4]	Q14739 1xBiotin [K190]	4	Q14739	DNA topoisomerase 2-alpha OS=Homo sapiens OX=9606 GN=TOP2A PE=1 SV=3	P11388 [1481-1489]	1	171.3	164.2	154.9	40	35	34.6	0.223491	-2.16171	1.49479e-05	29	4.82542	0.000235558	3.6279
[R].QAAVPLVKVER.[V]	1xBiotin [K8]	Q14687 1xBiotin [K624]	2	Q14687	HBS1-like protein OS=Homo sapiens OX=9606 GN=HBS1L PE=1 SV=1	Q9Y450 [162-170]	1	145.5	148	196.9	11.6	81.2	16.8	0.223491	-2.16171	0.0104809	267	1.9796	0.0179392	1.7462
[R].NTYKMTSLETK.[T]	1xBiotin [K4]	P46013 1xBiotin [K850]	1	P46013	Nucleophosmin OS=Homo sapiens OX=9606 GN=NPM1 PE=1 SV=2	P06748 [264-273]	1	151.1	174.9	165.3	33.9	52.5	22.3	0.22125	-2.17625	0.000337753	114	3.4714	0.00135398	2.86839
[K].AAVVVSKSGSLK.[K]	1xBiotin [K7]	Q14978 1xBiotin [K579]	3	Q14978	Microtubule-associated protein 4 OS=Homo sapiens OX=9606 GN=MAP4 PE=1 SV=3	P27816 [1056-1064]	1	191.2	157.8	143.4	19	62.8	25.8	0.218522	-2.19415	0.00283831	207	2.54694	0.00626622	2.20299
[K].IVSKAVTSK.[K]	1xBiotin [K4]	P11388 1xBiotin [K1484]	3	P11388	Ubiquitin carboxyl-terminal hydrolase 7 OS=Homo sapiens OX=9606 GN=USP7 PE=1 SV=2	Q93009 [1091-1099]	1	168	165.9	158.9	43.6	28.1	35.5	0.217532	-2.2007	1.65636e-05	31	4.78085	0.000244179	3.61229
[M].AGEKVEKPDTK.[E]	1xBiotin [K4]	Q02878 1xBiotin [K5]	3	Q02878	3'-5' RNA helicase YTHDC2 OS=Homo sapiens OX=9606 GN=YTHDC2 PE=1 SV=2	Q9H6S0 [1217-1231]	1	149.3	166	180.4	26.5	19.8	58	0.21041	-2.24873	0.000916926	154	3.03767	0.00272101	2.56527
[K].RFEHSAKLR.[R]	1xBiotin [K7]	Q9UPT9 1xBiotin [K417]	3	Q9UPT9	Proliferation marker protein Ki-67 OS=Homo sapiens OX=9606 GN=MKI67 PE=1 SV=2	P46013 [847-857]	1	160.6	165.8	171.5	51.6	24.8	25.8	0.205262	-2.28446	0.000144661	86	3.83965	0.000768721	3.11423
[R].TKNISAISYINQR.[N]	1xBiotin [K2]	Q92541 1xBiotin [K555]	3	Q92541	Microtubule-associated protein 4 OS=Homo sapiens OX=9606 GN=MAP4 PE=1 SV=3	P27816 [719-738]	1	184.5	166.2	147.2	12.3	84.2	5.6	0.205061	-2.28587	0.00851582	261	2.06977	0.0149109	1.8265
[K].APAQKAPAPK.[A]	1xBiotin [K5]	P50914 1xBiotin [K204]	4	P50914	Nucleolin OS=Homo sapiens OX=9606 GN=NCL PE=1 SV=3	P19338 [475-486]	1	171.9	168.2	158.4	39.8	31	30.7	0.203611	-2.29611	1.22371e-05	28	4.91232	0.000199727	3.69956
[K].GFKGLVVPSGGGR.[F]	1xBiotin [K3]	Q9UKX7 1xBiotin [K62]	1	Q9UKX7	SURP and G-patch domain-containing protein 2 OS=Homo sapiens OX=9606 GN=SUGP2 PE=1 SV=2	Q8IX01 [239-248]	1	56	94.9	348	15.1	33.4	52.5	0.202445	-2.3044	0.223574	395	0.650579	0.258667	0.58726
[K].AKGLVPEDDTKEK.[I]	1xBiotin [K2]	Q15459 1xBiotin [K533]	2	Q15459	Craniofacial development protein 1 OS=Homo sapiens OX=9606 GN=CFDP1 PE=1 SV=1	Q9UEE9 [135-150]	2	138.6	196	164.9	28.8	17.6	54.1	0.201201	-2.31329	0.00255393	197	2.59279	0.0059246	2.22734
[K].GGVGKLVTLR.[N]	1xBiotin [K5]	Q8IX01 1xBiotin [K243]	3	Q8IX01	Zinc finger CCCH domain-containing protein 14 OS=Homo sapiens OX=9606 GN=ZC3H14 PE=1 SV=1	Q6PJT7 [349-357]	1	192.7	157.2	150.3	53.6	14.8	31.5	0.19972	-2.32395	0.0015162	169	2.81924	0.00410002	2.38721
[R].GGKNSTWSGESK.[T]	1xBiotin [K3]	P19338 1xBiotin [K477]	3	P19338	Nucleophosmin OS=Homo sapiens OX=9606 GN=NPM1 PE=1 SV=2	P06748 [249-257]	1	182	149.8	168.4	26.4	37.1	36.2	0.19932	-2.32684	0.000177907	93	3.74981	0.000874232	3.05837
[K].GAAIPAKGAK.[N]	1xBiotin [K]	P19338 1xBiotin [K]	2	P19338	Msx2-interacting protein OS=Homo sapiens OX=9606 GN=SPEN PE=1 SV=1	Q96T58 [2670-2680]	1	165.3	174.1	161.6	41.8	20.2	37	0.197605	-2.33931	5.84316e-05	57	4.23335	0.000468478	3.32931
[R].YTYLEKAIK.[I]	1xBiotin [K]	Q93009 1xBiotin [K]	5	Q93009	60S ribosomal protein L14 OS=Homo sapiens OX=9606 GN=RPL14 PE=1 SV=4	P50914 [200-209]	1	192.1	157.4	151.7	32.2	26.6	39.9	0.196927	-2.34426	0.000527642	133	3.27766	0.00181303	2.7416
[K].EGKVIDHTPVEK.[L]	1xBiotin [K3]	Q96T58 1xBiotin [K889]	4	Q96T58	Actin-related protein 2/3 complex subunit 2 OS=Homo sapiens OX=9606 GN=ARPC2 PE=1 SV=1	O15144 [291-300]	1	158.5	163	180.4	39.5	28.5	30.1	0.195457	-2.35507	5.68866e-05	56	4.24499	0.000464236	3.33326
[K].EKGSFSDTGLGDGK.[M]	1xBiotin [K2]	Q9Y2W1 1xBiotin [K375]	2	Q9Y2W1	Serine/threonine-protein kinase PRP4 homolog OS=Homo sapiens OX=9606 GN=PRPF4B PE=1 SV=3	Q13523 [169-177]	1	184.9	159.9	157.5	40.3	37.5	19.9	0.194505	-2.36212	0.000240019	101	3.61975	0.00108603	2.96416
[K].VLKQVHPDTGISSK.[A]	1xBiotin [K3]	Q16778 1xBiotin [K47]; Q5QNW6 1xBiotin [K47]; P58876 1xBiotin [K47]	1	Q16778; Q5QNW6; P58876	PEST proteolytic signal-containing nuclear protein OS=Homo sapiens OX=9606 GN=PCNP PE=1 SV=2	Q8WW12 [71-82]	1	430.1	27.5	45.4	38.4	12.8	45.7	0.192644	-2.37599	0.362103	414	0.441168	0.399713	0.398252
[K].SLLPKESR.[L]	1xBiotin [K5]	Q9ULU4 1xBiotin [K1177]	5	Q9ULU4	Cysteine protease ATG4C OS=Homo sapiens OX=9606 GN=ATG4C PE=1 SV=1	Q96DT6 [25-32]	1	168.5	169	165.7	31.2	35.9	29.8	0.192568	-2.37656	3.5382e-07	2	6.45122	8.08479e-05	4.09233
[K].FGFAIGSQTTKK.[A]	1xBiotin [K]	Q8WW12 1xBiotin [K]	10	Q8WW12	Thyroid hormone receptor-associated protein 3 OS=Homo sapiens OX=9606 GN=THRAP3 PE=1 SV=2	Q9Y2W1 [514-522]	1	169.8	164	169.3	32.6	29.9	34.3	0.192407	-2.37777	4.60186e-07	6	6.33707	3.50509e-05	4.4553
[K].TILPKVMQVK.[N]	1xBiotin [K5]	P55081 1xBiotin [K376]	3	P55081	Histone H1.2 OS=Homo sapiens OX=9606 GN=HIST1H1C PE=1 SV=2	P16403 [91-106]	1	152.7	186	164.6	18.4	48	30.3	0.192132	-2.37983	0.000477391	127	3.32113	0.00171786	2.76501
[K].GKLELVDNK.[I]	1xBiotin [K2]	Q13523 1xBiotin [K170]	3	Q13523	Proliferation marker protein Ki-67 OS=Homo sapiens OX=9606 GN=MKI67 PE=1 SV=2	P46013 [2484-2492]	1	190.6	131.1	181.7	35.3	23.6	37.8	0.192094	-2.38012	0.00205613	184	2.68695	0.00510681	2.29185
[K].GPVKGSVTTLK.[S]	1xBiotin [K4]	Q96T58 1xBiotin [K2673]	3	Q96T58	Msx2-interacting protein OS=Homo sapiens OX=9606 GN=SPEN PE=1 SV=1	Q96T58 [887-898]	1	190.8	148.8	164.4	41.3	22.5	32.1	0.190278	-2.39382	0.000530946	134	3.27495	0.00181076	2.74214
[K].AKMQASIEK.[G]	1xBiotin [K2]; 1xOxidation [M3]	P06748 1xBiotin [K250]	1	P06748	Protein kinase C-binding protein 1 OS=Homo sapiens OX=9606 GN=ZMYND8 PE=1 SV=2	Q9ULU4 [1173-1180]	1	198.2	154.3	151.8	29.9	33.2	32.6	0.189768	-2.39769	0.000837017	151	3.07727	0.00253322	2.59633
[K].QANKNLILK.[A]	1xBiotin [K4]	Q6PJT7 1xBiotin [K352]	2	Q6PJT7	Guanidinoacetate N-methyltransferase OS=Homo sapiens OX=9606 GN=GAMT PE=1 SV=1	Q14353 [36-44]	0	164.2	168.6	171.7	43.8	33.2	18.4	0.189098	-2.40279	5.91172e-05	59	4.22829	0.000457908	3.33922
[-].MKIFCSR.[A]	1xBiotin [K2]; 1xCarbamidomethyl [C5]	Q9NVM4 1xBiotin [K2]	1	Q9NVM4	Bifunctional glutamate/proline--tRNA ligase OS=Homo sapiens OX=9606 GN=EPRS PE=1 SV=5	P07814 [940-961]	1	164.8	175.7	164.6	27.1	43	24.7	0.187686	-2.41361	3.63453e-05	45	4.43955	0.000369107	3.43285
[K].AVTTPGKKGATPGK.[A]	2xBiotin [K7; K8]	P19338 2xBiotin [K109; K110]	2	P19338	Microfibrillar-associated protein 1 OS=Homo sapiens OX=9606 GN=MFAP1 PE=1 SV=2	P55081 [372-381]	1	130.9	180.9	193.3	13.5	23.4	57.9	0.187686	-2.41361	0.00423461	226	2.37319	0.00856291	2.06738
[R].VNVDKVLER.[D]	1xBiotin [K5]	P23763 1xBiotin [K54]	3	P23763	Vesicle-associated membrane protein 1 OS=Homo sapiens OX=9606 GN=VAMP1 PE=1 SV=1	P23763 [50-58]	1	176.8	166	162.7	29.9	14.5	50.1	0.186944	-2.41932	0.000252258	102	3.59815	0.00113022	2.94684
[R].ILGKPVMER.[W]	1xBiotin [K4]	Q14353 1xBiotin [K39]	1	Q14353	RING-type E3 ubiquitin-protein ligase PPIL2 OS=Homo sapiens OX=9606 GN=PPIL2 PE=1 SV=1	Q13356 [478-490]	1	156.5	165.6	183.7	30.6	40.4	23.1	0.186042	-2.4263	0.000129852	83	3.88655	0.000714966	3.14571
[R].VLMKSPSPALHPPQK.[Y]	1xBiotin [K4]	Q9H6S0 1xBiotin [K1220]	1	Q9H6S0	Emerin OS=Homo sapiens OX=9606 GN=EMD PE=1 SV=1	P50402 [79-88]	1	154.2	155.5	197.4	16.8	44.4	31.8	0.183396	-2.44697	0.00106001	157	2.97469	0.00308551	2.51067
[K].IPLVKVDMK.[E]	1xBiotin [K5]	P46013 1xBiotin [K2488]	1	P46013	Replication protein A 70 kDa DNA-binding subunit OS=Homo sapiens OX=9606 GN=RPA1 PE=1 SV=2	P27694 [264-273]	1	135.9	203.6	168.8	33.6	26.4	31.6	0.180209	-2.47226	0.00211867	185	2.67394	0.00523369	2.28119
[R].KGSVLQSIEK.[I]	1xBiotin [K1]	Q5T3J3 1xBiotin [K500]	2	Q5T3J3	Zinc finger protein 638 OS=Homo sapiens OX=9606 GN=ZNF638 PE=1 SV=2	Q14966 [1471-1480]	1	202.8	144.1	162.3	15.1	54.9	20.8	0.178319	-2.48747	0.00283185	206	2.54793	0.0062823	2.20188
[K].KEDALLYQSK.[G]	1xBiotin [K1]	P50402 1xBiotin [K79]	2	P50402	Splicing factor 3A subunit 1 OS=Homo sapiens OX=9606 GN=SF3A1 PE=1 SV=1	Q15459 [532-544]	2	178.6	154.3	177.1	35.1	27.4	27.6	0.176667	-2.5009	7.11214e-05	67	4.148	0.000485112	3.31416
[R].ISALQGKLSK.[L]	1xBiotin [K]	Q14966 1xBiotin [K]	2	Q14966	Protein phosphatase methylesterase 1 OS=Homo sapiens OX=9606 GN=PPME1 PE=1 SV=3	Q9Y570 [2-12]	1	157.4	159.1	193.6	27.8	27.6	34.4	0.176044	-2.50599	0.000308063	111	3.51136	0.00126833	2.89677
[K].KGEETEETSSSKLLVK.[A]	1xBiotin [K12]	Q9UEE9 1xBiotin [K146]	2	Q9UEE9	Treacle protein OS=Homo sapiens OX=9606 GN=TCOF1 PE=1 SV=3	Q13428 [726-746]	1	173.6	168.2	168.5	33.5	14.9	41.3	0.175779	-2.50817	6.30044e-05	63	4.20063	0.000457032	3.34005
[K].KTNTTASAKVAPVR.[V]	1xBiotin [K9]	Q13428 1xBiotin [K655]	3	Q13428	Protein arginine N-methyltransferase 7 OS=Homo sapiens OX=9606 GN=PRMT7 PE=1 SV=1	Q9NVM4 [1-7]	1	140.7	174.5	195.3	18.5	22	49	0.175318	-2.51195	0.00165347	172	2.7816	0.00439322	2.35722
[K].KFAETQPK.[K]	1xBiotin [K1]	P26641 1xBiotin [K220]	1	P26641	TOX high mobility group box family member 4 OS=Homo sapiens OX=9606 GN=TOX4 PE=1 SV=1	O94842 [194-207]	1	227.3	10	273.3	32.3	24.5	32.7	0.175284	-2.51223	0.15908	372	0.798386	0.195428	0.709012
[R].QGVGKYINPAATK.[R]	1xBiotin [K5]	Q13356 1xBiotin [K482]	3	Q13356	Nucleolar and coiled-body phosphoprotein 1 OS=Homo sapiens OX=9606 GN=NOLC1 PE=1 SV=2	Q14978 [573-584]	1	189	159.9	162.4	23.3	34.1	31.3	0.173479	-2.52716	0.000139302	85	3.85604	0.00074895	3.12555
[K].AASVPVKGSLGQGTAPVLPGK.[T]	1xBiotin [K7]	Q13428 1xBiotin [K732]	6	Q13428	Histone H4 OS=Homo sapiens OX=9606 GN=HIST1H4A PE=1 SV=2	P62805 [10-17]	1	156.5	155.5	199.5	30.1	33.6	24.8	0.173021	-2.53098	0.000664903	140	3.17724	0.00217043	2.66345
[K].IANKQFTAVK.[N]	1xBiotin [K4]	P27694 1xBiotin [K267]	5	P27694	Non-POU domain-containing octamer-binding protein OS=Homo sapiens OX=9606 GN=NONO PE=1 SV=4	Q15233 [1-11]	1	196.2	151.6	164.2	26.7	32.4	29	0.17207	-2.53893	0.000454541	122	3.34243	0.00170267	2.76887
[K].GTLVQTKGTGASGSFK.[L]	1xBiotin [K7]	P16403 1xBiotin [K97]	3	P16403	60S ribosomal protein L6 OS=Homo sapiens OX=9606 GN=RPL6 PE=1 SV=3	Q02878 [2-12]	1	187.5	148	178.6	15.3	35.1	35.5	0.167088	-2.58132	0.000478772	128	3.31987	0.00170937	2.76716
[R].GFVPEKNFR.[V]	1xBiotin [K6]	Q9Y2W1 1xBiotin [K519]	2	Q9Y2W1	Ubiquitin carboxyl-terminal hydrolase 22 OS=Homo sapiens OX=9606 GN=USP22 PE=1 SV=2	Q9UPT9 [411-419]	2	183	168.1	163.3	16.8	35	33.9	0.166602	-2.58552	6.87059e-05	65	4.16301	0.000483055	3.316
[K].NALWEPKSK.[N]	1xBiotin [K9]	Q13901 1xBiotin [K128]	3	Q13901	DNA (cytosine-5)-methyltransferase 1 OS=Homo sapiens OX=9606 GN=DNMT1 PE=1 SV=2	P26358 [247-255]	1	199	147.6	168.2	56.6	12	16.7	0.165695	-2.59339	0.00224082	189	2.64959	0.00541827	2.26614
[K].SNYKMMFVK.[S]	1xBiotin [K4]; 1xOxidation [M]	O00193 1xBiotin [K174]	3	O00193	Condensin complex subunit 2 OS=Homo sapiens OX=9606 GN=NCAPH PE=1 SV=3	Q15003 [628-637]	1	114.1	261.8	141	31.7	12.6	38.8	0.160766	-2.63696	0.0349316	310	1.45678	0.051496	1.28823
[K].GLGKGGAK.[CR]	1xBiotin [K4]	P62805 1xBiotin [K13]	3	P62805	Nucleolin OS=Homo sapiens OX=9606 GN=NCL PE=1 SV=3	P19338 [125-132]	1	208.2	173.1	136.5	28.6	28	25.5	0.158555	-2.65694	0.00218171	188	2.6612	0.00530342	2.27544
[K].GKHGFSDNQK.[L]	1xBiotin [K2]	Q8WW12 1xBiotin [K152]	2	Q8WW12	Zinc finger CCCH domain-containing protein 11A OS=Homo sapiens OX=9606 GN=ZC3H11A PE=1 SV=3	O75152 [574-582]	1	161	197.7	159.9	21.1	21.7	38.6	0.156961	-2.67152	0.000439864	120	3.35668	0.00167515	2.77595
[-].MQSNKTFNLEK.[Q]	1xAcetyl [N-Term]; 1xBiotin [K5]	Q15233 1xAcetyl [N-Term]; 1xBiotin [K5]	4	Q15233	Histone H2B type 2-E OS=Homo sapiens OX=9606 GN=HIST2H2BE PE=1 SV=3 Histone H2B type 2-F OS=Homo sapiens OX=9606 GN=HIST2H2BF PE=1 SV=3 Histone H2B type 1-D OS=Homo sapiens OX=9606 GN=HIST1H2BD PE=1 SV=2	Q16778 [110-121]; Q5QNW6 [110-121]; P58876 [110-121]	1	145.4	199.1	174.5	33.4	19.7	27.9	0.156069	-2.67974	0.000804541	149	3.09445	0.00246762	2.60772
[K].GGHGAASPSEKGAHPSGGADDVAK.[K]	1xBiotin [K11]	Q07065 1xBiotin [K21]	7	Q07065	Targeting protein for Xklp2 OS=Homo sapiens OX=9606 GN=TPX2 PE=1 SV=2	Q9ULW0 [486-494]	1	155.1	198	165.9	16.6	60.6	3.8	0.156069	-2.67974	0.00245188	193	2.6105	0.00580575	2.23614
[R].QLPSQKTVVVEAGK.[K]	1xBiotin [K6]	O94842 1xBiotin [K199]	7	O94842	Small acidic protein OS=Homo sapiens OX=9606 GN=SMAP PE=1 SV=1	O00193 [171-179]	1	196.7	160.2	163.5	34	26.8	18.9	0.153151	-2.70697	0.000294778	106	3.53051	0.00127088	2.8959
[K].KGAAIPAK.[G]	1xBiotin [K1]	P19338 1xBiotin [K125]	3	P19338	Transcription initiation factor IIE subunit beta OS=Homo sapiens OX=9606 GN=GTF2E2 PE=1 SV=1	P29084 [283-291]	0	164.8	176.3	179.3	35.3	17.3	27	0.152959	-2.70878	2.75352e-05	36	4.56011	0.000349545	3.4565
[K].ETLHKTMVTR.[F]	1xBiotin [K5]	P98175 1xBiotin [K920]	2	P98175	Elongation factor 1-gamma OS=Homo sapiens OX=9606 GN=EEF1G PE=1 SV=3	P26641 [220-227]	1	465.9	29.6	25.1	32.1	12	35.3	0.152516	-2.71296	0.371865	416	0.429615	0.408515	0.388792
[R].VMAGTLKLEDK.[Q]	1xBiotin [K7]	O00541 1xBiotin [K517]	2	O00541	60S ribosomal protein L29 OS=Homo sapiens OX=9606 GN=RPL29 PE=1 SV=2	P47914 [29-38]	1	162.8	175.3	183	24.2	38.9	15.7	0.151219	-2.72529	8.04266e-05	73	4.0946	0.000503493	3.29801
[R].SGSISVKIIR.[H]	1xBiotin [K7]	Q8TF01 1xBiotin [K730]	2	Q8TF01	Probable ATP-dependent RNA helicase DDX46 OS=Homo sapiens OX=9606 GN=DDX46 PE=1 SV=2	Q7L014 [904-915]	1	189.5	136.4	195.7	42.2	14.7	21.5	0.150307	-2.73402	0.00198554	180	2.70212	0.00504106	2.29748
[R].AQSKILFVR.[S]	1xBiotin [K4]	Q9HCS7 1xBiotin [K794]	3	Q9HCS7	Nucleolar and coiled-body phosphoprotein 1 OS=Homo sapiens OX=9606 GN=NOLC1 PE=1 SV=2	Q14978 [408-419]	1	178	166.7	178.8	10.1	22.2	44.2	0.146132	-2.77466	0.000155278	89	3.80889	0.000797325	3.09836
[K].TPKGPSSVEDIK.[A]	1xBiotin [K3]	P06748 1xBiotin [K239]	4	P06748	Histone H2B type 2-E OS=Homo sapiens OX=9606 GN=HIST2H2BE PE=1 SV=3	Q16778 [2-12]	1	174.1	171.7	179.9	41.8	17.6	14.9	0.141335	-2.82281	7.15024e-05	69	4.14568	0.000473574	3.32461
[K].VNKIEIHYAK.[T]	1xBiotin [K3]	Q15003 1xBiotin [K630]	1	Q15003	Nucleophosmin OS=Homo sapiens OX=9606 GN=NPM1 PE=1 SV=2	P06748 [143-154]	1	255.7	225.5	44.5	23.7	39.3	11.3	0.141335	-2.82281	0.0862348	354	1.06432	0.111326	0.953404
[R].EKSVLTPLR.[G]	1xBiotin [K2]	O75152 1xBiotin [K575]	5	O75152	Pescadillo homolog OS=Homo sapiens OX=9606 GN=PES1 PE=1 SV=1	O00541 [511-521]	1	181.7	169.3	175.1	14.4	33	26.5	0.140468	-2.83169	2.07658e-05	32	4.68265	0.000296562	3.52788
[K].TPALKMSVSK.[R]	1xBiotin [K5]	Q7Z4V5 1xBiotin [K163]	3	Q7Z4V5	Polymerase delta-interacting protein 3 OS=Homo sapiens OX=9606 GN=POLDIP3 PE=1 SV=2	Q9BY77 [145-155]	1	190.8	160.9	174.4	23.3	28.8	21.7	0.140278	-2.83364	7.14608e-05	68	4.14593	0.000480259	3.31852
[R].SAPGGGSKVPQK.[K]	1xBiotin [K8]	P06748 1xBiotin [K150]	5	P06748	Nucleophosmin OS=Homo sapiens OX=9606 GN=NPM1 PE=1 SV=2	P06748 [207-221]	1	186.5	171.6	168.3	23.8	21.2	28.7	0.140008	-2.83642	1.49844e-05	30	4.82436	0.000228262	3.64157
[K].QPVQKGVKPQAK.[A]	1xBiotin [K5]	Q14978 1xBiotin [K148]	3	Q14978	Hepatoma-derived growth factor-related protein 2 OS=Homo sapiens OX=9606 GN=HDGFL2 PE=1 SV=1	Q7Z4V5 [159-168]	1	180.2	185.7	160.9	20	34.1	19.1	0.138952	-2.84734	7.2026e-05	70	4.14251	0.000470227	3.32769
[M].PEPAKSAPAPK.[K]	1xBiotin [K5]	Q16778 1xBiotin [K6]	6	Q16778	PEST proteolytic signal-containing nuclear protein OS=Homo sapiens OX=9606 GN=PCNP PE=1 SV=2	Q8WW12 [151-160]	1	184.5	168.3	174.2	24.3	28.1	20.5	0.13833	-2.85381	8.40253e-06	23	5.07559	0.000166955	3.7774
[R].YESLKGVDPK.[F]	1xBiotin [K5]	P47914 1xBiotin [K33]	3	P47914	Treacle protein OS=Homo sapiens OX=9606 GN=TCOF1 PE=1 SV=3	Q13428 [647-660]	2	181.1	185.7	160.5	25.8	11.8	35.1	0.137872	-2.8586	0.000123754	81	3.90744	0.000698214	3.15601
[K].SPAFALKNR.[I]	1xBiotin [K7]	Q9ULW0 1xBiotin [K492]	4	Q9ULW0	60S ribosomal protein L7a OS=Homo sapiens OX=9606 GN=RPL7A PE=1 SV=2	P62424 [122-131]	1	193.6	163.5	170.6	30.6	25.7	15.9	0.13682	-2.86965	0.000112311	79	3.94958	0.000649696	3.18729
[K].GLQVKAASVPVK.[G]	1xBiotin [K5]	Q13428 1xBiotin [K725]	3	Q13428	Paraspeckle component 1 OS=Homo sapiens OX=9606 GN=PSPC1 PE=1 SV=1	Q8WXF1 [5-11]	1	160.9	180.8	186.7	16.3	37.1	18.1	0.135314	-2.88562	0.000119742	80	3.92175	0.000684027	3.16493
[K].AAGKGDVPTK.[R]	1xBiotin [K4]	P62424 1xBiotin [K125]	3	P62424	Nucleolin OS=Homo sapiens OX=9606 GN=NCL PE=1 SV=3	P19338 [103-116]	2	190.8	176	162.1	23.2	35	12.9	0.13443	-2.89507	0.000128439	82	3.8913	0.00071581	3.1452
[K].TLAEKSR.[G]	1xBiotin [K5]	O95218 1xBiotin [K59]	6	O95218	Ligand-dependent nuclear receptor-interacting factor 1 OS=Homo sapiens OX=9606 GN=LRIF1 PE=1 SV=1	Q5T3J3 [500-509]	1	164.3	187.2	177.8	31.9	20.6	18.2	0.133573	-2.9043	4.15111e-05	49	4.38184	0.000387154	3.41212
[K].INAKLNYVPLEK.[Q]	1xBiotin [K4]	Q7L014 1xBiotin [K907]	6	Q7L014	Zinc finger Ran-binding domain-containing protein 2 OS=Homo sapiens OX=9606 GN=ZRANB2 PE=1 SV=2	O95218 [47-59]	1	168.1	171	191.7	23.9	28.2	17.2	0.130558	-2.93724	4.50719e-05	52	4.34609	0.000396112	3.40218
[R].SQTKEPTPK.[Q]	1xBiotin [K4]	P26358 1xBiotin [K250]	3	P26358	Pre-mRNA-splicing factor SYF1 OS=Homo sapiens OX=9606 GN=XAB2 PE=1 SV=2	Q9HCS7 [791-799]	1	181	180.6	169.5	30	28	10.8	0.129542	-2.9485	2.76439e-05	37	4.5584	0.00034144	3.46669
[K].LTKTIQVPQQK.[A]	1xBiotin [K3]	Q9BY77 1xBiotin [K147]	2	Q9BY77	Zinc finger RNA-binding protein OS=Homo sapiens OX=9606 GN=ZFR PE=1 SV=2	Q96KR1 [497-509]	1	220	161.7	149.6	23.5	14.7	30.4	0.129117	-2.95325	0.00225579	190	2.6467	0.00542576	2.26554
[K].SNQNGKDSKPSSTPR.[S]	1xBiotin [K6]	P06748 1xBiotin [K212]	2	P06748	Nucleolin OS=Homo sapiens OX=9606 GN=NCL PE=1 SV=3	P19338 [72-80]	1	149.8	201.6	180.9	11.6	24.6	31.5	0.127184	-2.97501	0.000660057	139	3.18042	0.00217012	2.66352
[R].GNLKQVR.[I]	1xBiotin [K4]	Q8WXF1 1xBiotin [K8]	1	Q8WXF1	Nucleolar and coiled-body phosphoprotein 1 OS=Homo sapiens OX=9606 GN=NOLC1 PE=1 SV=2	Q14978 [144-155]	1	188.3	181.1	164.2	25.8	23.4	17.2	0.124438	-3.0065	3.32896e-05	41	4.47769	0.000371057	3.43056
[K].EISSVKLVSR.[Y]	1xBiotin [K6]	P46013 1xBiotin [K210]	3	P46013	Serine/threonine-protein phosphatase 4 regulatory subunit 3A OS=Homo sapiens OX=9606 GN=PPP4R3A PE=1 SV=1	Q6IN85 [729-739]	1	182.5	171.4	181.1	24.5	21	19.5	0.121495	-3.04103	2.05022e-06	12	5.6882	7.80792e-05	4.10746
[K].HAVSEGTKAVTK.[Y]	1xBiotin [K8]	Q16778 1xBiotin [K117]; Q5QNW6 1xBiotin [K117]; P58876 1xBiotin [K117]	6	Q16778; Q5QNW6; P58876	Nucleophosmin OS=Homo sapiens OX=9606 GN=NPM1 PE=1 SV=2	P06748 [251-263]	1	204.3	168	163.6	7.7	25.7	30.6	0.119425	-3.06582	0.000427054	119	3.36952	0.00164003	2.78515
[K].DYSDITSSK.[-]	1xBiotin [K9]	P29084 1xBiotin [K291]	3	P29084	Zinc finger Ran-binding domain-containing protein 2 OS=Homo sapiens OX=9606 GN=ZRANB2 PE=1 SV=2	O95218 [55-61]	1	183.1	166.9	186.2	27.9	26.2	9.6	0.118799	-3.07341	4.67358e-05	53	4.33035	0.000402986	3.39471
[K].QNDTPKGPQPPTVSPIR.[S]	1xBiotin [K6]	P46087 1xBiotin [K778]	5	P46087	Proliferation marker protein Ki-67 OS=Homo sapiens OX=9606 GN=MKI67 PE=1 SV=2	P46013 [205-214]	1	187.7	148.2	200.9	14.2	28.1	20.9	0.117735	-3.08639	0.000641011	138	3.19313	0.00212277	2.6731
[K].TSTPKINFVGGNK.[L]	1xBiotin [K5]	Q96KR1 1xBiotin [K501]	3	Q96KR1	Eukaryotic translation initiation factor 4B OS=Homo sapiens OX=9606 GN=EIF4B PE=1 SV=2	P23588 [357-372]	0	170.4	186.3	180.2	8.6	32.3	22.2	0.117527	-3.08894	4.45582e-05	50	4.35107	0.000407262	3.39013
[K].DLGHNDKSSTPGLK.[S]	1xBiotin [K7]	Q04726 1xBiotin [K309]	1	Q04726	Arginine/serine-rich protein PNISR OS=Homo sapiens OX=9606 GN=PNISR PE=1 SV=2	Q8TF01 [724-733]	1	198.5	159.8	179	37.1	13.1	12.4	0.116508	-3.10149	0.000331179	113	3.47994	0.00133937	2.8731
[K].MQASIEKGGSLPK.[V]	1xBiotin [K7]	P06748 1xBiotin [K257]	3	P06748	Genetic suppressor element 1 OS=Homo sapiens OX=9606 GN=GSE1 PE=1 SV=3	Q14687 [617-627]	1	183.5	156.5	197.5	16.8	21.4	24.3	0.116279	-3.10434	0.000205273	97	3.68767	0.000967112	3.01452
[K].FMSKVIGANK.[N]	1xBiotin [K4]	Q9Y2W1 1xBiotin [K455]	3	Q9Y2W1	Nucleophosmin OS=Homo sapiens OX=9606 GN=NPM1 PE=1 SV=2	P06748 [222-229]	1	167.4	168.5	201.6	15.4	14.8	32.3	0.116279	-3.10434	0.000230954	100	3.63647	0.00105546	2.97656
[R].SKGQESFK.[K]	1xBiotin [K2]	P06748 1xBiotin [K223]	5	P06748	Probable 28S rRNA (cytosine(4447)-C(5))-methyltransferase OS=Homo sapiens OX=9606 GN=NOP2 PE=1 SV=2	P46087 [773-789]	1	180.1	182.2	175.8	20.4	23.5	17.9	0.114849	-3.1222	3.59031e-07	3	6.44487	5.46924e-05	4.26207
[R].KPESNAVTKTAGPIASAQK.[Q]	1xBiotin [K9]	P27816 1xBiotin [K976]	2	P27816	Retinoblastoma-associated protein OS=Homo sapiens OX=9606 GN=RB1 PE=1 SV=2	P06400 [862-874]	1	487.5	32.7	19	19.9	21.6	19.3	0.11276	-3.14868	0.358751	413	0.445207	0.396971	0.401241
[K].EVLLKTNLSGR.[Q]	1xBiotin [K5]	Q6IN85 1xBiotin [K733]	3	Q6IN85	Treacle protein OS=Homo sapiens OX=9606 GN=TCOF1 PE=1 SV=3	Q13428 [721-732]	1	202.5	157.7	179.7	21.1	26.6	12.3	0.111132	-3.16966	0.000297824	109	3.52604	0.00124868	2.90355
[R].AKSQNPLR.[S]	1xBiotin [K2]	Q9NY93 1xBiotin [K525]	3	Q9NY93	Nucleophosmin OS=Homo sapiens OX=9606 GN=NPM1 PE=1 SV=2	P06748 [237-248]	1	180.6	190.2	170.7	9.4	39.6	9.5	0.108033	-3.21045	0.000152009	87	3.81813	0.000798482	3.09774
[K].VAVATPAKK.[A]	1xBiotin [K8]	P19338 1xBiotin [K79]	1	P19338	Cytoskeleton-associated protein 4 OS=Homo sapiens OX=9606 GN=CKAP4 PE=1 SV=2	Q07065 [11-34]	1	132	209.1	200.6	16.7	25.4	16.1	0.10744	-3.2184	0.00280288	204	2.5524	0.006279	2.20211
[K].AGGTEIGKTLAEK.[S]	1xBiotin [K8]	O95218 1xBiotin [K54]	3	O95218	Treacle protein OS=Homo sapiens OX=9606 GN=TCOF1 PE=1 SV=3	Q13428 [717-725]	1	205	161.6	175.6	25.5	9.9	22.3	0.106418	-3.23218	0.000291708	105	3.53505	0.00126962	2.89633
[R].SAEGSNPPKPLKK.[L]	1xBiotin [K]	P06400 1xBiotin [K]	5	P06400	Nuclear nucleic acid-binding protein C1D OS=Homo sapiens OX=9606 GN=C1D PE=1 SV=1	Q13901 [120-128]	1	159.1	172.7	211.7	16.6	17.5	22.4	0.103956	-3.26596	0.000514321	130	3.28877	0.00180804	2.74279
[M].SLKLQASNVTNK.[N]	1xAcetyl [N-Term]; 1xBiotin [K3]	Q9UKM9 1xAcetyl [N-Term]; 1xBiotin [K4]	3	Q9UKM9	Uncharacterized protein C12orf45 OS=Homo sapiens OX=9606 GN=C12orf45 PE=1 SV=2	Q8N5I9 [171-182]	1	211.4	197.1	136.2	30.5	13.7	11.1	0.101524	-3.30011	0.00238807	192	2.62195	0.00568409	2.24534
[R].KSVLADQGK.[S]	1xBiotin [K1]	Q9NYF8 1xBiotin [K413]	4	Q9NYF8	Lamina-associated polypeptide 2, isoform alpha OS=Homo sapiens OX=9606 GN=TMPO PE=1 SV=2	P42166 [333-344]	1	194.9	178.7	172.2	13.8	25.6	14.8	0.0993038	-3.33201	2.93453e-05	38	4.53246	0.000352916	3.45233
[R].EKSGIQPLCPER.[S]	1xBiotin [K2]; 1xCarbamidomethyl [C9]	P42166 1xBiotin [K334]	6	P42166	Jupiter microtubule associated homolog 1 OS=Homo sapiens OX=9606 GN=JPT1 PE=1 SV=3	Q9UK76 [2-15]	1	178.9	184.4	183.1	13.1	17.2	23.4	0.0982796	-3.34696	1.12912e-06	8	5.94726	6.45009e-05	4.19043
[K].SVGKGLQVK.[A]	1xBiotin [K4]	Q13428 1xBiotin [K720]	1	Q13428	Thyroid hormone receptor-associated protein 3 OS=Homo sapiens OX=9606 GN=THRAP3 PE=1 SV=2	Q9Y2W1 [452-461]	1	23.8	184.9	337.7	15.1	18.3	20.2	0.0980966	-3.34965	0.144155	368	0.841171	0.179018	0.747103
[M].SESSSKSSQPLASK.[Q]	1xAcetyl [N-Term]; 1xBiotin [K6]	P17096 1xAcetyl [N-Term]; 1xBiotin [K7]	1	P17096	Probable RNA-binding protein 19 OS=Homo sapiens OX=9606 GN=RBM19 PE=1 SV=3	Q9Y4C8 [537-551]	1	510.5	10.2	26.2	6.2	27.6	19.3	0.0970927	-3.36449	0.373074	417	0.428205	0.40886	0.388425
[M].PDPAKSAPAPK.[K]	1xBiotin [K5]	Q5QNW6 1xBiotin [K6]	3	Q5QNW6	Histone H2B type 2-F OS=Homo sapiens OX=9606 GN=HIST2H2BF PE=1 SV=3	Q5QNW6 [2-12]	1	200.5	166.5	180.1	14.5	14.6	23.8	0.0966916	-3.37046	9.10894e-05	74	4.04053	0.000562538	3.24985
[M].TTTTTFKGVDPNSR.[N]	1xAcetyl [N-Term]; 1xBiotin [K7]	Q9UK76 1xAcetyl [N-Term]; 1xBiotin [K8]	2	Q9UK76	Bcl-2-associated transcription factor 1 OS=Homo sapiens OX=9606 GN=BCLAF1 PE=1 SV=2	Q9NYF8 [413-421]	1	242.6	174.9	131.6	14.8	13.6	22.4	0.092515	-3.43417	0.00686792	251	2.16317	0.0125045	1.90293
[K].SQVFDHETKGSVAVR.[V]	1xBiotin [K9]	Q9Y4C8 1xBiotin [K545]	2	Q9Y4C8	RNA-binding protein Raly OS=Homo sapiens OX=9606 GN=RALY PE=1 SV=1	Q9UKM9 [2-13]	1	97.5	210.5	243.2	16.7	8.8	23.4	0.0887155	-3.49467	0.0194997	287	1.70997	0.0310501	1.50794
[K].GTPGKGATPAPPGK.[A]	1xBiotin [K5]	Q13428 1xBiotin [K313]	21	Q13428	Histone H4 OS=Homo sapiens OX=9606 GN=HIST1H4A PE=1 SV=2	P62805 [7-13]	1	184.8	181.1	187.8	19.4	13.1	13.9	0.0837999	-3.57691	4.31539e-07	4	6.36498	4.93033e-05	4.30712
[R].TKIEFVTGTK.[K]	1xBiotin [K2]	Q9UHR5 1xBiotin [K220]	2	Q9UHR5	Histone H1.2 OS=Homo sapiens OX=9606 GN=HIST1H1C PE=1 SV=2	P16403 [188-196]	1	172.5	203.7	177.8	8.1	12.7	25.3	0.083213	-3.58705	0.000101188	77	3.99487	0.000600556	3.22145
[-].MQSNKTFNLEK.[Q]	1xAcetyl [N-Term]; 1xBiotin [K5]; 1xOxidation [M1]	Q15233 1xAcetyl [N-Term]; 1xBiotin [K5]	5	Q15233	Heterogeneous nuclear ribonucleoprotein U OS=Homo sapiens OX=9606 GN=HNRNPU PE=1 SV=6	Q00839 [182-204]	1	198.1	181.7	174.3	11.4	11.1	23.5	0.0830175	-3.59044	3.14086e-05	40	4.50295	0.000358844	3.44509
[K].STQPISSVGKPASVIK.[N]	1xBiotin [K10]	Q7Z6E9 1xBiotin [K1344]	2	Q7Z6E9	Treacle protein OS=Homo sapiens OX=9606 GN=TCOF1 PE=1 SV=3	Q13428 [804-820]	1	183.4	191.7	179.5	21.8	13.5	10.1	0.0818608	-3.61068	4.49773e-06	16	5.34701	0.000128466	3.89121
[K].TFGKAAGPSLSHTSGGTQSK.[V]	1xBiotin [K4]	P27694 1xBiotin [K167]	1	P27694	Transducin-like enhancer protein 3 OS=Homo sapiens OX=9606 GN=TLE3 PE=1 SV=2	Q04726 [303-316]	1	14.5	21.1	519.9	22.6	15.3	6.6	0.080108	-3.64191	0.36655	415	0.435867	0.403646	0.393999
[M].AQYKGAASEAGR.[A]	1xAcetyl [N-Term]; 1xBiotin [K4]	Q14320 1xAcetyl [N-Term]; 1xBiotin [K5]	3	Q14320	Treacle protein OS=Homo sapiens OX=9606 GN=TCOF1 PE=1 SV=3	Q13428 [309-322]	1	207.3	185.4	163.6	5.5	28.8	9.4	0.0785547	-3.67016	0.000298999	110	3.52433	0.00124221	2.90581
[K].SAAKAVKPK.[A]	1xBiotin [K4]	P16403 1xBiotin [K191]	3	P16403	Mediator of DNA damage checkpoint protein 1 OS=Homo sapiens OX=9606 GN=MDC1 PE=1 SV=3	Q14676 [1830-1840]	1	182.8	192.8	181.3	14.5	17.2	11.4	0.0773927	-3.69166	1.74247e-06	10	5.75883	7.96308e-05	4.09892
[R].GEVSQKTVIIK.[E]	1xBiotin [K6]	Q14676 1xBiotin [K1835]	4	Q14676	RNA polymerase-associated protein RTF1 homolog OS=Homo sapiens OX=9606 GN=RTF1 PE=1 SV=4	Q92541 [554-566]	1	211.1	160.8	185.5	15.3	15.7	11.6	0.0764263	-3.70979	0.000298164	108	3.52554	0.00126168	2.89905
[K].GTISAPGKVVTAAAQAK.[Q]	1xBiotin [K8]	Q13428 1xBiotin [K811]	5	Q13428	E3 ubiquitin-protein ligase RBBP6 OS=Homo sapiens OX=9606 GN=RBBP6 PE=1 SV=1	Q7Z6E9 [1335-1350]	0	169	180	209.9	16.4	9.9	14.7	0.0733584	-3.76889	0.000153086	88	3.81506	0.000795004	3.09963
[K].GKIEVLDSPASK.[K]	1xBiotin [K2]	Q8N5I9 1xBiotin [K172]	3	Q8N5I9	Nucleolin OS=Homo sapiens OX=9606 GN=NCL PE=1 SV=3	P19338 [568-577]	1	394.2	81.2	83.8	7.8	8.6	24.5	0.0731402	-3.77319	0.172151	379	0.764091	0.20758	0.682814
[K].GGKGLGK.[G]	1xBiotin [K3]	P62805 1xBiotin [K9]	5	P62805	SAP30-binding protein OS=Homo sapiens OX=9606 GN=SAP30BP PE=1 SV=1	Q9UHR5 [219-228]	1	220.2	190.3	148.7	21.6	15	4.3	0.0731402	-3.77319	0.00126433	160	2.89814	0.00361123	2.44234
[M].AKMEVK.[T]	1xAcetyl [N-Term]; 1xBiotin [K2]	O43795 1xAcetyl [N-Term]; 1xBiotin [K3]	1	O43795	Splicing factor 3A subunit 1 OS=Homo sapiens OX=9606 GN=SF3A1 PE=1 SV=1	Q15459 [532-542]	1	213.3	186.9	159.2	10	22.4	8.2	0.0725778	-3.78433	0.000440859	121	3.3557	0.00166506	2.77857
[K].KVAVATPAK.[K]	1xBiotin [K1]	P19338 1xBiotin [K71]	6	P19338	Nucleophosmin OS=Homo sapiens OX=9606 GN=NPM1 PE=1 SV=2	P06748 [249-257]	1	185	185.5	189.4	19.7	11.8	8.6	0.0716199	-3.8035	1.09026e-06	7	5.96247	7.11786e-05	4.14765
[R].AGGVMKIVR.[E]	1xBiotin [K6]	Q9Y2L1 1xBiotin [K18]	6	Q9Y2L1	Nucleolin OS=Homo sapiens OX=9606 GN=NCL PE=1 SV=3	P19338 [71-79]	1	193.4	184.7	182.1	18.3	11.2	10.3	0.0710461	-3.8151	2.15642e-06	13	5.66627	7.58064e-05	4.12029
[R].SQPSKTLFVK.[G]	1xBiotin [K5]	P19338 1xBiotin [K572]	6	P19338	Scaffold attachment factor B1 OS=Homo sapiens OX=9606 GN=SAFB PE=1 SV=4	Q15424 [569-578]	1	144.8	231.2	185	16.8	5.8	16.4	0.0695187	-3.84645	0.0023144	191	2.63556	0.00553759	2.25668
[R].LSDKGLK.[A]	1xBiotin [K4]	Q00839 1xBiotin [K28]	5	Q00839	Non-POU domain-containing octamer-binding protein OS=Homo sapiens OX=9606 GN=NONO PE=1 SV=4	Q15233 [1-11]	1	176.8	199.6	184.7	20.2	9	9.8	0.0695063	-3.84671	2.14978e-05	33	4.66761	0.000297712	3.5262
[K].AKGLVPEDDTK.[E]	1xBiotin [K2]	Q15459 1xBiotin [K533]	4	Q15459	Nucleophosmin OS=Homo sapiens OX=9606 GN=NPM1 PE=1 SV=2	P06748 [135-142]	1	187	167.3	207.8	13.2	7.4	17.3	0.0674257	-3.89056	0.000131091	84	3.88243	0.0007132	3.14679
[R].VLGPKIEAVQK.[V]	1xBiotin [K5]	Q7Z4V5 1xBiotin [K554]	6	Q7Z4V5	Treacle protein OS=Homo sapiens OX=9606 GN=TCOF1 PE=1 SV=3	Q13428 [909-918]	1	192.2	179.9	190.3	19.3	10.9	7.4	0.0668563	-3.90279	4.67166e-06	18	5.33053	0.000118608	3.92588
[K].SKGVPVISVK.[T]	1xBiotin [K2]	Q15424 1xBiotin [K570]	3	Q15424	Exosome complex exonuclease RRP44 OS=Homo sapiens OX=9606 GN=DIS3 PE=1 SV=2	Q9Y2L1 [13-21]	1	206	178.8	177.6	11.4	11.1	15	0.0666785	-3.90663	4.81633e-05	54	4.31728	0.000407604	3.38976
[K].AKMQASIEK.[G]	1xBiotin [K2]	P06748 1xBiotin [K250]	5	P06748	Hepatoma-derived growth factor-related protein 2 OS=Homo sapiens OX=9606 GN=HDGFL2 PE=1 SV=1	Q7Z4V5 [550-560]	1	219.9	179.5	163.9	11	14.2	11.5	0.0651518	-3.94005	0.000464915	125	3.33263	0.00169973	2.76962
[K].LLSISGKR.[S]	1xBiotin [K7]	P06748 1xBiotin [K141]	6	P06748	Zinc finger matrin-type protein 2 OS=Homo sapiens OX=9606 GN=ZMAT2 PE=1 SV=1	Q96NC0 [62-70]	1	200.2	184.2	179.7	12.6	11.8	11.4	0.0634639	-3.97792	9.32362e-06	25	5.03042	0.000170436	3.76844
[K].AFSIGKMSTAK.[R]	1xBiotin [K6]	O15042 1xBiotin [K88]	3	O15042	Nucleolin OS=Homo sapiens OX=9606 GN=NCL PE=1 SV=3	P19338 [81-88]	1	188.2	191.8	185	6	6.5	22.5	0.0619469	-4.01282	6.74882e-06	21	5.17077	0.000146867	3.83308
[K].EAAGKSSGPTSLFAVTVAPPGAR.[Q]	1xBiotin [K5]	Q00839 1xBiotin [K186]	13	Q00839	Probable ATP-dependent RNA helicase DDX56 OS=Homo sapiens OX=9606 GN=DDX56 PE=1 SV=1	Q9NY93 [524-531]	1	214.9	159.3	191.1	16.8	15.2	2.5	0.0610295	-4.03435	0.000452197	123	3.34467	0.00168011	2.77466
[K].LGKTIVITK.[T]	1xBiotin [K3]	Q96NC0 1xBiotin [K64]	2	Q96NC0	Zinc finger Ran-binding domain-containing protein 2 OS=Homo sapiens OX=9606 GN=ZRANB2 PE=1 SV=2	O95218 [136-146]	1	284.2	144.2	137.9	15.9	5.5	12.2	0.0593325	-4.07503	0.0206353	294	1.68539	0.0320759	1.49382
[K].AAVTPGKK.[A]	1xBiotin [K8]	P19338 1xBiotin [K88]	3	P19338	Unconventional myosin-Ib OS=Homo sapiens OX=9606 GN=MYO1B PE=1 SV=3	O43795 [2-7]	1	185.8	179.6	201.8	10.2	13.2	9.5	0.0580042	-4.1077	1.19761e-05	27	4.92168	0.000202706	3.69313
[K].ALAKTEK.[Y]	1xBiotin [K4]	Q9Y2X3 1xBiotin [K415]	5	Q9Y2X3	Heterogeneous nuclear ribonucleoprotein U OS=Homo sapiens OX=9606 GN=HNRNPU PE=1 SV=6	Q00839 [25-31]	1	191.5	191.3	185.9	5.3	6.6	19.3	0.054862	-4.18805	3.14793e-06	14	5.50198	0.000102757	3.98819
[K].KTVTPAK.[A]	1xBiotin [K1]	P19338 1xBiotin [K96]	12	P19338	Nucleoprotein TPR OS=Homo sapiens OX=9606 GN=TPR PE=1 SV=3	P12270 [388-394]	0	183.2	184.5	202.6	11.8	8.9	8.9	0.0519025	-4.26805	9.08549e-06	24	5.04165	0.000173003	3.76195
[R].KGAAPTPPGK.[T]	1xBiotin [K1]	Q13428 1xBiotin [K909]	7	Q13428	Protein FAM50A OS=Homo sapiens OX=9606 GN=FAM50A PE=1 SV=2	Q14320 [2-13]	1	188.3	181.5	200.7	5.2	12.7	11.7	0.0518843	-4.26856	7.76354e-06	22	5.10994	0.00016127	3.79245
[K].IVKPGMK.[L]	1xBiotin [K3]; 1xOxidation [M6]	P12270 1xBiotin [K390]	4	P12270	Nucleolin OS=Homo sapiens OX=9606 GN=NCL PE=1 SV=3	P19338 [96-102]	1	292.2	142.7	136.5	16.4	4.7	7.4	0.0498775	-4.32547	0.0238647	301	1.62224	0.036233	1.4409
[K].KSPAKSPNPSTPR.[G]	1xBiotin [K5]	O76021 1xBiotin [K395]	6	O76021	Ribosomal L1 domain-containing protein 1 OS=Homo sapiens OX=9606 GN=RSL1D1 PE=1 SV=3	O76021 [391-403]	2	176.2	210.1	186.4	8.2	13.8	5.3	0.0476689	-4.39081	6.16107e-05	62	4.21034	0.00045413	3.34282
[M].SKSESPKEPEQLR.[K]	1xAcetyl [N-Term]; 1xBiotin [K2]	P09651 1xAcetyl [N-Term]; 1xBiotin [K3]	3	P09651	Protein FAM50A OS=Homo sapiens OX=9606 GN=FAM50A PE=1 SV=2	Q14320 [96-103]	1	562.4	8.3	2.3	7	10.9	9.1	0.0471204	-4.4075	0.382567	419	0.417292	0.417263	0.37959
[K].ELQMKLEK.[L]	1xBiotin [K5]	Q14320 1xBiotin [K100]	3	Q14320	Far upstream element-binding protein 2 OS=Homo sapiens OX=9606 GN=KHSRP PE=1 SV=4	Q92945 [71-80]	1	185.5	194.9	194.1	7.7	9.3	8.4	0.0442124	-4.49941	4.58333e-07	5	6.33882	4.18916e-05	4.37787
[R].GKAVGPASILK.[E]	1xBiotin [K2]	O95218 1xBiotin [K137]	7	O95218	Nucleolin OS=Homo sapiens OX=9606 GN=NCL PE=1 SV=3	P19338 [110-116]	1	186.6	187	201.4	10.6	3.4	10.9	0.0433043	-4.52934	4.65646e-06	17	5.33194	0.000125177	3.90248
[R].TKQPIPAAYNR.[Y]	1xBiotin [K2]	Q6P1J9 1xBiotin [K283]	3	Q6P1J9	Treacle protein OS=Homo sapiens OX=9606 GN=TCOF1 PE=1 SV=3	Q13428 [293-301]	1	166.3	212.4	196.5	12.1	6	6.8	0.0432893	-4.52985	0.000177608	92	3.75054	0.000882247	3.05441
[K].KGATPGK.[A]	1xBiotin [K1]	P19338 1xBiotin [K110]	3	P19338	Parafibromin OS=Homo sapiens OX=9606 GN=CDC73 PE=1 SV=1	Q6P1J9 [282-292]	1	148.5	276.6	152	11.4	5.1	6.4	0.0396812	-4.6554	0.011871	276	1.92551	0.019656	1.7065
[R].KDAFADAVQR.[A]	1xBiotin [K1]	Q92945 1xBiotin [K71]	4	Q92945	Nucleolar protein 58 OS=Homo sapiens OX=9606 GN=NOP58 PE=1 SV=1	Q9Y2X3 [412-418]	1	266.9	157.5	153.1	7	4.3	11.2	0.038961	-4.68182	0.00768962	255	2.11409	0.013781	1.86072
[K].KVVVSPTK.[K]	1xBiotin [K1]	P19338 1xBiotin [K63]	1	P19338	U2 snRNP-associated SURP motif-containing protein OS=Homo sapiens OX=9606 GN=U2SURP PE=1 SV=2	O15042 [83-93]	1	213.8	195.2	172.5	4.5	5	8.9	0.0316423	-4.982	9.82873e-05	76	4.0075	0.000591017	3.2284
[R].KGAAPAPPR.[K]	1xBiotin [K1]	Q13428 1xBiotin [K449]	6	Q13428	RNA-binding protein Raly OS=Homo sapiens OX=9606 GN=RALY PE=1 SV=1	Q9UKM9 [158-165]	1	185.9	193.2	203.3	3.1	11.2	3.3	0.0302198	-5.04836	5.03304e-06	19	5.29817	0.000121058	3.91701
[K].ASEKILQVR.[A]	1xBiotin [K4]	Q13428 1xBiotin [K296]	5	Q13428	Lymphokine-activated killer T-cell-originated protein kinase OS=Homo sapiens OX=9606 GN=PBK PE=1 SV=3	Q96KB5 [55-65]	1	197	183.2	202.5	7.4	8	1.9	0.0296894	-5.07391	6.36918e-06	20	5.19592	0.000145536	3.83703
[R].GLSHSPWAVKK.[I]	1xBiotin [K]	Q96KB5 1xBiotin [K]	2	Q96KB5	Ribosomal L1 domain-containing protein 1 OS=Homo sapiens OX=9606 GN=RSL1D1 PE=1 SV=3	O76021 [392-403]	1	172.1	196.7	214.8	2.4	8.1	5.9	0.0281014	-5.15321	0.000110838	78	3.95531	0.000649399	3.18749
[R].VKTNVPVK.[L]	1xBiotin [K2]	Q9UKM9 1xBiotin [K159]	3	Q9UKM9	Nucleophosmin OS=Homo sapiens OX=9606 GN=NPM1 PE=1 SV=2	P06748 [240-250]	1	230.9	181.7	171.2	6.4	7.4	2.3	0.0275779	-5.18034	0.000511328	129	3.2913	0.00181145	2.74197
[K].SPIKASDLTK.[F]	1xBiotin [K4]	Q5QJE6 1xBiotin [K384]	6	Q5QJE6	Nucleolin OS=Homo sapiens OX=9606 GN=NCL PE=1 SV=3	P19338 [63-70]	1	198.3	187.7	199.4	4.8	2.3	7.5	0.0249402	-5.32538	1.19335e-06	9	5.92323	6.05958e-05	4.21756
[K].GPSSVEDIKAK.[M]	1xBiotin [K]	P06748 1xBiotin [K]	5	P06748	Deoxynucleotidyltransferase terminal-interacting protein 2 OS=Homo sapiens OX=9606 GN=DNTTIP2 PE=1 SV=2	Q5QJE6 [381-390]	1	193.4	176.5	215.9	2.8	5.6	5.7	0.0240696	-5.37664	7.63899e-05	71	4.11696	0.000491693	3.30831
[K].SPAKSPNPSTPR.[G]	1xBiotin [K4]	O76021 1xBiotin [K395]	8	O76021	Treacle protein OS=Homo sapiens OX=9606 GN=TCOF1 PE=1 SV=3	Q13428 [449-457]	1	202.7	195.7	187.7	6	2.6	5.2	0.0235455	-5.40841	1.77525e-06	11	5.75074	7.37535e-05	4.13222
[K].GATPGKALVATPGK.[K]	1xBiotin [K6]	P19338 1xBiotin [K116]	6	P19338	Treacle protein OS=Homo sapiens OX=9606 GN=TCOF1 PE=1 SV=3	Q13428 [384-393]	1	211.1	174.2	203.7	2.8	2.2	6	0.0186757	-5.74269	7.01903e-05	66	4.15372	0.000486014	3.31335
[R].KGAAPAPPGK.[T]	1xBiotin [K1]	Q13428 1xBiotin [K384]	7	Q13428	Nucleolin OS=Homo sapiens OX=9606 GN=NCL PE=1 SV=3	P19338 [111-124]	1	183.4	190.5	215.4	3	4.9	2.8	0.0181571	-5.78332	3.8143e-05	48	4.41858	0.000363154	3.43991
