# Supplementary material for: AirID, a novel proximity biotinylation enzyme, for analysis of protein–protein interactions
Source: eLife journal article supplement (doi:10.7554/elife.54983), 2020-05-11

A

| No. | Compared sequence<br>(red: biotinylated peptide)<br>(blue: biotinylated lysine residue) |
|-----|-----------------------------------------------------------------------------------------|
| 1   | DTHSKR <b>TLLIK</b> TVETRDGQVI                                                          |
| 2   | GKKAAATPAK <b>K</b> TVTPAKAVTT                                                          |
| 3   | EMMRR <b>QQEGF</b> <b>K</b> GTFPDAREQE                                                  |
| 4   | ASAPAK <b>GTPG</b> <b>K</b> GATPAPP <b>GKA</b>                                          |
| 5   | ER <b>LDPFADGG</b> <b>K</b> TPDPKMNART                                                  |
| 6   | EEPQQR <b>GQGE</b> <b>K</b> SATPSRKILD                                                  |
| 7   | PTAAAVAK <b>IV</b> <b>K</b> PGMKLTTELYN                                                 |
| 8   | DFR <b>MEESFSS</b> <b>KY</b> VPKYVPLAD                                                  |
| 9   | EDVK <b>LLSISG</b> <b>K</b> SAPGGGSKV                                                   |
| 10  | <b>FGFAIGSQT</b> <b>TK</b> ASAISIKLG                                                    |
| 11  | AVDKK <b>AAGAG</b> <b>KV</b> TKSAQKAQK                                                  |
| 12  | ISHKRLNP <b>DG</b> <b>K</b> SIRNEDKILT                                                  |
| 13  | <b>RPDQQLQGE</b> <b>GKI</b> IDRRPERRP                                                   |
| 14  | TRLKSR <b>VLGP</b> <b>K</b> IEAVQKV <b>NKA</b>                                          |
| 15  | TK <b>EGVLYVGS</b> <b>K</b> TKEGVVHGVA                                                  |
| 16  | PAKK <b>AAVTPG</b> <b>K</b> KAAATPAKKT                                                  |
| 17  | TSPSF <b>SKAEN</b> <b>K</b> GISPVVSEHR                                                  |
| 18  | FSKGT <b>LKIAN</b> <b>KQ</b> FTAVKNDYE                                                  |
| 19  | DIPAIFR <b>EGM</b> <b>K</b> NTSYVLKHPS                                                  |
| 20  | AEMYVAK <b>FAAK</b> <b>G</b> GEGQLGPAER                                                 |

B

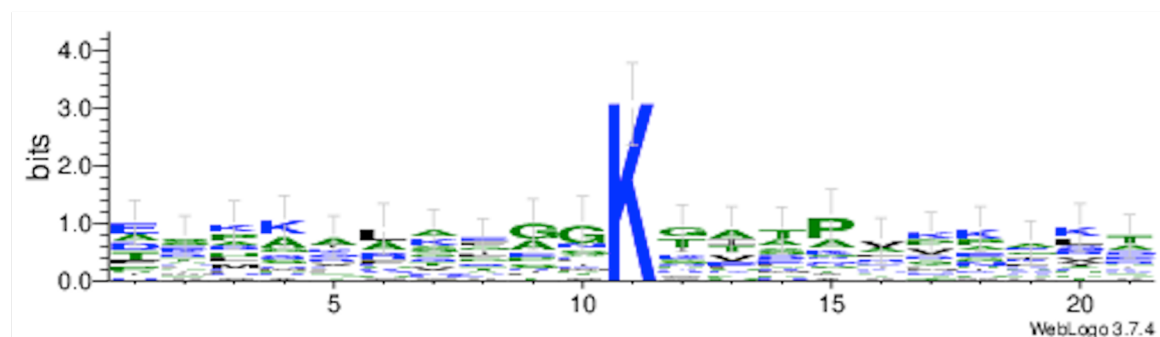

Supplement: supp [file elife-54983-supp-v1.zip]
