# Supplementary material for: AirID, a novel proximity biotinylation enzyme, for analysis of protein–protein interactions
Source: eLife journal article supplement (doi:10.7554/elife.54983), 2020-05-11
Supplement: supp [file elife-54983-supp-v1.zip]

**A**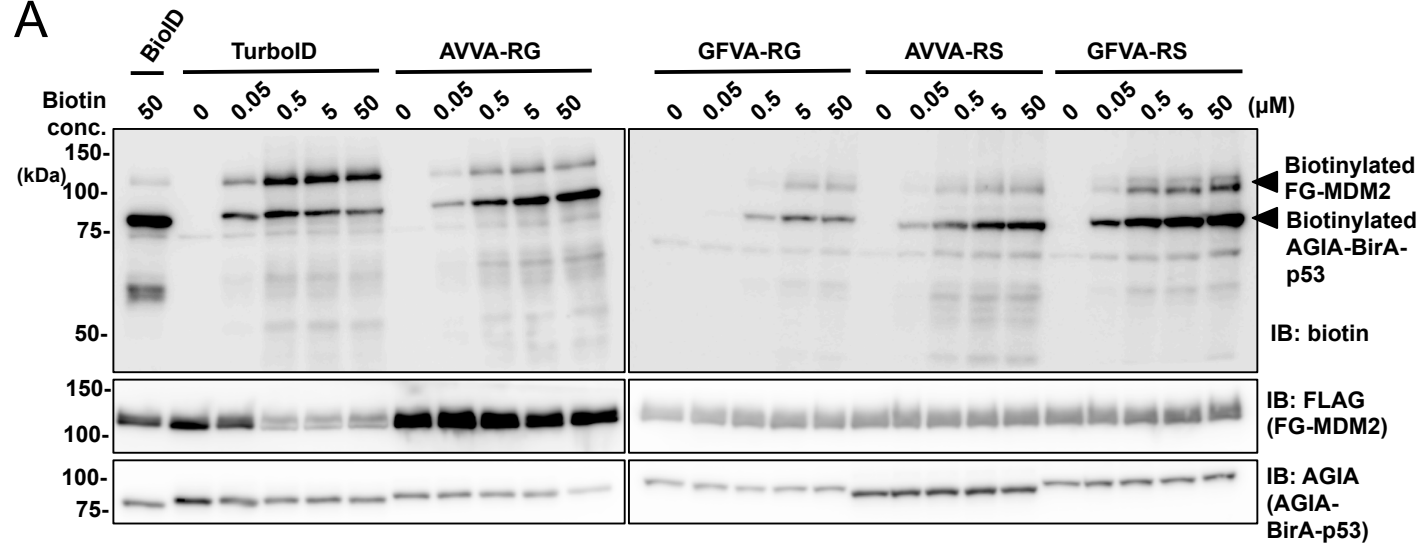

**BioID: 16h**  
**TurboID: 1h**  
**GFVA-RG: 6h**  
**AVVA, GFVA: 3h**  
**Biotinylation temp.: 26°C**

**B**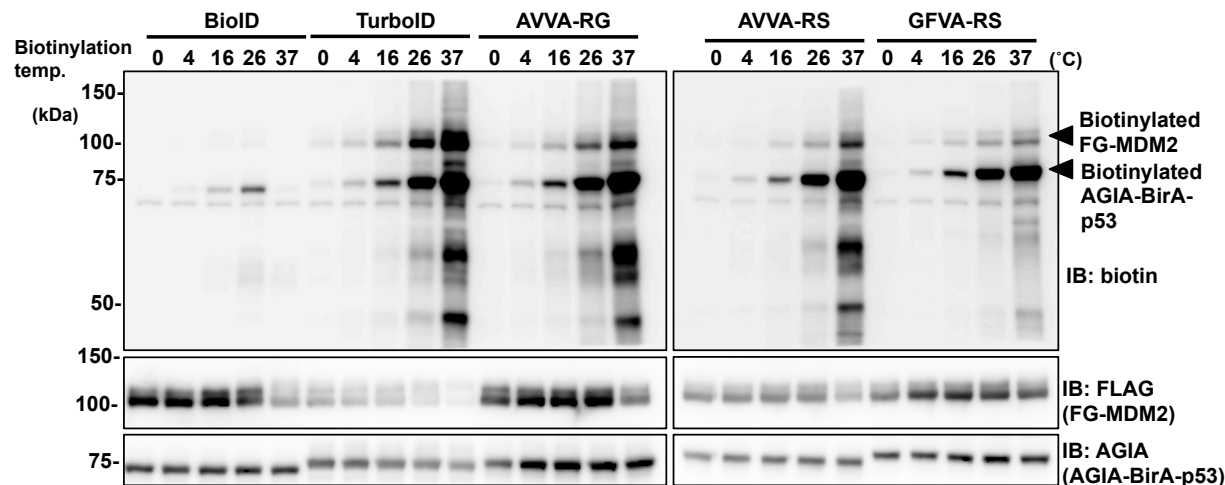

**BioID: 16h**  
**TurboID: 1h**  
**AVVA, GFVA: 3h**  
**Biotin conc.: 500 nM**
