# Supplementary material for: AirID, a novel proximity biotinylation enzyme, for analysis of protein–protein interactions
Source: eLife journal article supplement (doi:10.7554/elife.54983), 2020-05-11

# myc-IKZF1 + myc-SALL4

AGIA-AirID-CRBN

WT

YW/AA

Pomalidomide

- 50 - 50 - 50 - 50 (μM)

Biotin

- - + + - - + +

(kDa)

250 -

150 -

100 -

75 -

50 -

◀ MYC-SALL4

IB: biotin

◀ MYC-IKZF1

250 -

150 -

100 -

75 -

◀ MYC-SALL4

IB: Myc

◀ MYC-IKZF1

50 -

100 -

75 -

50 -

IB: AGIA  
(AirID-CRBN)

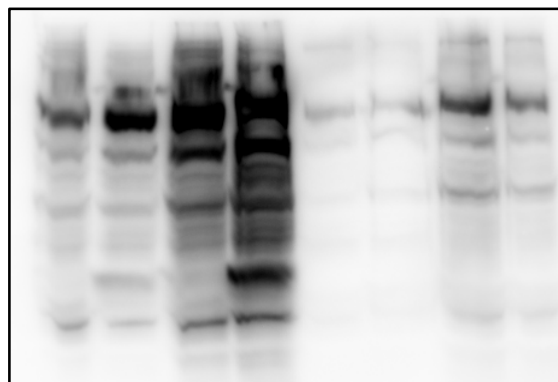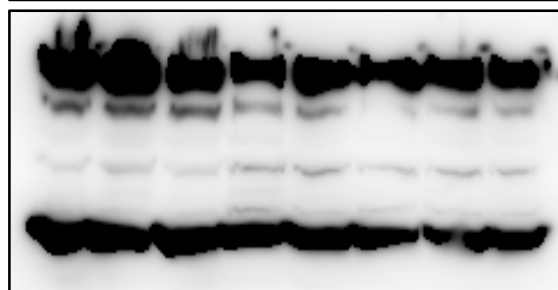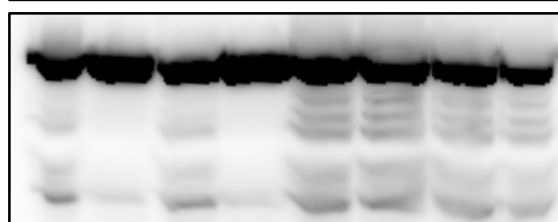

Supplement: supp [file elife-54983-supp-v1.zip]
