# Supplementary material for: AirID, a novel proximity biotinylation enzyme, for analysis of protein–protein interactions
Source: eLife journal article supplement (doi:10.7554/elife.54983), 2020-05-11
Supplement: supp [file elife-54983-supp-v1.zip]

**- Biotin**

**+ Biotin (50  $\mu$ M)**

**-** **Biold** **TurboID** **AVVA-RG** **AVVA-RS** **GFVA-RS**

**-** **Biold** **TurboID** **AVVA-RG** **AVVA-RS** **GFVA-RS**

**FG-MDM2(CS)**

(kDa)

150-

100-

75-

50-

150-

100-

100-

75-

50-

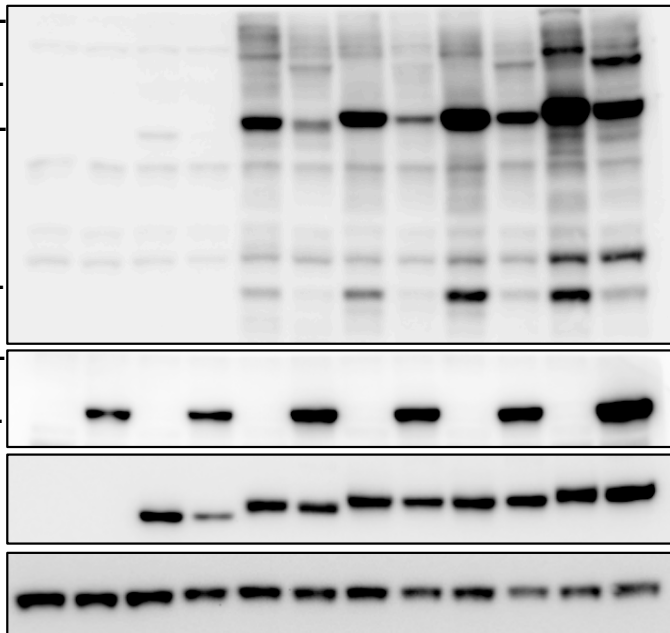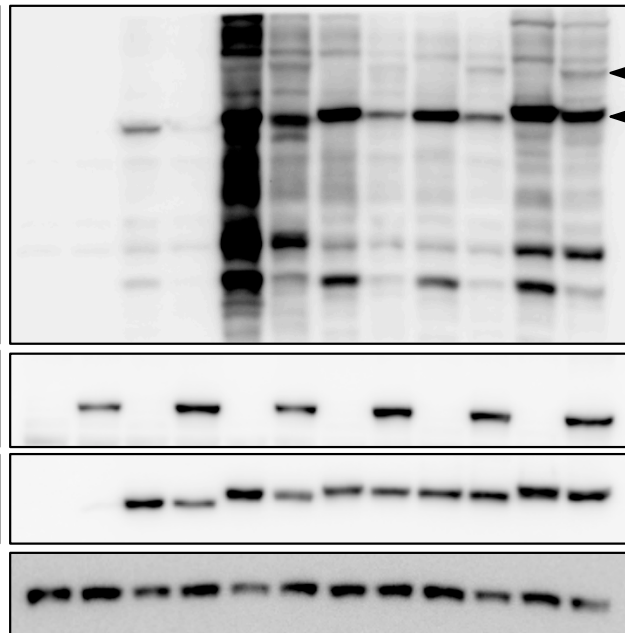

**◀ GFP-MDM2(CS)**

**◀ BirA-p53**

**IB: biotin**

**IB: GFP  
(GFP-MDM2(CS))**

**IB: AGIA  
(BirA-p53)**

**IB: Tubulin**
