# Supplementary material for: AirID, a novel proximity biotinylation enzyme, for analysis of protein–protein interactions
Source: eLife journal article supplement (doi:10.7554/elife.54983), 2020-05-11
Supplement: supp [file elife-54983-supp-v1.zip]

## Short exposure

AGIA-  
BirA

AGIA-  
BirA-p53

Ctrl BiOLD Turboid AirID  
BiOLD Turboid AirID

(kDa)

100-  
75-

50-

37-

25-

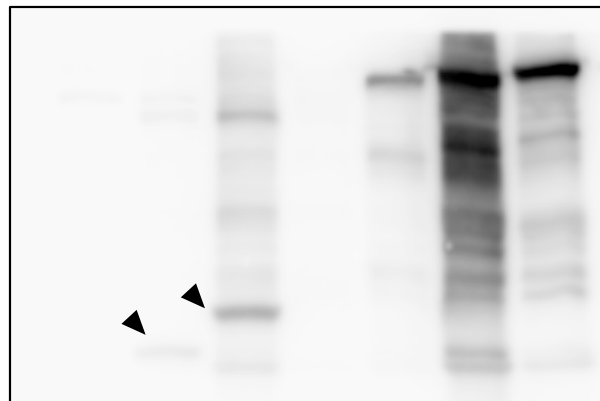

100-  
75-

50-

37-

25-

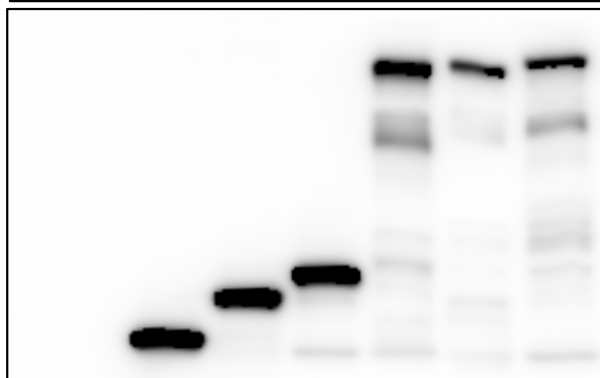

IB: AGIA  
(BirA or BirA-p53)

## Long exposure

AGIA-  
BirA

AGIA-  
BirA-p53

Ctrl BiOLD Turboid AirID  
BiOLD Turboid AirID

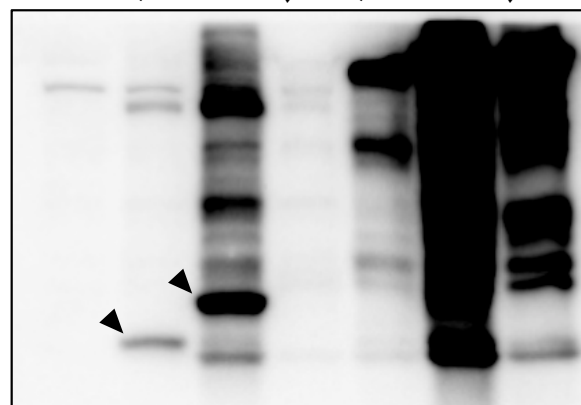

IB: biotin
