# Supplementary material for: AirID, a novel proximity biotinylation enzyme, for analysis of protein–protein interactions
Source: eLife. 2020 May 11;9:e54983. doi: 10.7554/eLife.54983 (PMC7302878; doi:10.7554/eLife.54983)
Supplement: Supplementary file 1. — Amino acid and nucleic acid sequences for the ancestral BirAs designed (AVVA, AFVA, AHLA, GFVA, and all) in this report. [file elife-54983-supp1.xlsx]

## Sheet: Sheet1
Supplementary table 1. Sequences of ancestral BirA used in this study.
Name	Amino acids	Nucleotides
AVVA	MSEQWSRKREILALLSSGHFVSGEELATQLGISRTAVSKHIAALEEYGVDIYSVKGKGYKLANPISLIDESKLKSAINNRCFYFDEIPSTNGFMLKHAEELKSGDICVAEYQSAGRGRRGRTWVSPYGCHLYFSLYWRFPQGMAQAMGLSLVVACSLVKVLKSFGVDGVGVKWPNDIYLNHKKLAGVLIEMSGQADSECHLVIGIGINMAMSEQQGKKIDQPWSDLSSLTSMPDKTELLIALQKQLKQDLELFEREGLKAFQPRWQEADLFYGKQIKLLMGENQVEGICRGIDEQGAVLLETDDGIQAFIGGEISLRAA	ATGTCTGAGCAGTGGTCTAGGAAGAGAGAGATCCTTGCTCTCCTCAGCTCTGGACATTTCGTGTCTGGTGAGGAACTTGCTACTCAGCTCGGAATCTCTAGAACCGCTGTGAGCAAACATATCGCTGCCCTTGAAGAGTACGGCGTGGACATCTATAGCGTGAAAGGTAAGGGATACAAGCTCGCGAACCCGATCTCTCTTATCGACGAGTCTAAGCTCAAGAGCGCCATCAACAACCGTTGCTTCTACTTCGACGAGATCCCGTCTACCAACGGCTTCATGCTTAAACACGCTGAGGAACTCAAGTCCGGGGATATCTGTGTTGCTGAGTACCAGTCTGCTGGAAGAGGACGTAGAGGAAGAACTTGGGTTTCACCTTACGGATGCCACCTCTACTTC…
AFVA	MRNKQNPLKLIEILADGQFHSGEELASLFGITRAGINKYIKILREWGLVLSSVQGKGYCLASKLDLLNKTKIEQHYHSKNRLEILPIIDSTNQYLLDKIDSLQSGDCCVAEFQSKARGRRGRQWFSPFGSNLYFSMYWRLEQGIAAAMGLSLVVGIVIADVLRQLSGQDIKVKWPNDLYLNDQKLAGILVEIAGKTGDCAHVVIGIGVNLMMTNPDTNIVNQKWANLGNVDRNLLVASVAQTLKAKLIEFEQQGLAAFINDWQRLDNFVNRPVKLLIGDKIIRGIAKGINQQGALLLEQEGEINAYIGGEISLRSDE	ATGAGGAACAAGCAGAACCCGCTTAAGCTCATCGAGATCCTTGCTGATGGACAGTTCCACTCTGGTGAGGAACTCGCTTCTTTGTTCGGAATCACCCGTGCTGGGATCAACAAGTACATCAAGATCCTCAGAGAGTGGGGCCTCGTTCTCTCATCTGTTCAAGGTAAGGGATACTGCCTCGCCTCTAAGCTTGATCTCCTCAACAAGACCAAGATCGAGCAGCACTACCACAGCAAGAACAGGCTTGAGATCCTTCCGATCATCGACTCGACTAACCAGTACCTCCTCGACAAGATCGACTCTCTTCAGAGCGGAGATTGCTGTGTTGCTGAGTTCCAGTCTAAGGCTAGAGGACGTAGAGGTAGGCAATGGTTCTCTCCGTTCGGAAGCAACCTCTAC…
AHLA	MRPFPLLRLLSDGEFHSGQALAEALGVSRASIWNALRNAEALGVDVHAVRGRGYRLSEPLDWLDEAIVARHLGEKASFFDLHVLDSVDSTNTALMERALQGAPHGTCVAAERQTAGRGRRGRAWHAVLGGSLTFSLLWRFNLGLGSLSGLSLAVGLAVVRALNKLGVHGARLKWPNDVLTDYRKLAGILIELQGDMLGPAAAVIGIGLNVRLSEAARNAVDQAVVDLHSLCGAPADRNTLLADLLRELAAMLTAFEQDGFAPLRAEWEAHHAYQDKAVRLLLPDGAGVQGVARGVDEDGALLLE-TQSGERRFHSGEISLRPAA	ATGAGGCCTTTTCCGCTTCTCAGACTCTTGTCTGATGGGGAGTTCCATTCTGGACAAGCTCTTGCTGAAGCTCTCGGAGTGTCTAGAGCTTCTATCTGGAACGCTCTCAGAAACGCTGAGGCTCTTGGAGTTGATGTGCATGCTGTTAGAGGACGTGGGTACAGACTTTCTGAGCCTCTTGATTGGCTCGACGAGGCTATCGTTGCTAGACATCTTGGAGAGAAGGCCAGCTTCTTCGATCTCCATGTTCTCGACTCTGTGGACTCTACTAACACGGCTCTCATGGAAAGGGCTCTCCAAGGTGCTCCTCATGGAACTTGTGTTGCTGCTGAGAGACAGACTGCTGGAAGAGGAAGAAGAGGTAGAGCTTGGCATGCTGTGCTTGGAGGATCTCTTACC…
GFVA	MKDNTVPLTLISILADGEFHSGEQLGEQLGMSRAAINKHIKTLRDWGVDVFRVQGKGYCLPEPIQLLDEEKIRQQLDEGSVTVLPVIDSTNQYLLDRLDELTSGDVCIAEYQQAGRGRRGRKWFSPFGANLYLSMYWRLEQGPAAAMGLSLVIGIVMAETLQKLGADGVRVKWPNDLYLNDRKLAGILVEMTGKTGDAAHIVIGAGINLSMREPETDEVDQSWINLQEAGITIDRNQLAARLIKDLRSALRQFEQQGLAPFLSRWEALDNFINRPVKLIIGDREIHGIARGINEQGALLLEQDGVIKPWIGGEISLRSA	ATGAAGGACAACACCGTTCCGCTCACGCTTATCTCTATCCTTGCTGATGGTGAGTTCCACTCTGGTGAACAACTTGGAGAGCAGCTCGGAATGTCTAGGGCTGCTATTAACAAGCACATCAAGACCCTCCGTGACTGGGGAGTTGATGTGTTCAGAGTTCAAGGTAAGGGGTACTGCCTTCCTGAGCCTATCCAACTTCTCGACGAAGAGAAGATCAGGCAGCAGCTTGATGAGGGATCTGTTACTGTTCTCCCGGTGATCGATTCGACCAACCAGTACCTTCTCGATAGGCTCGATGAGCTTACCTCTGGTGATGTGTGTATCGCTGAGTACCAACAGGCTGGAAGAGGACGTAGAGGTAGGAAGTGGTTTTCTCCGTTCGGAGCTAACCTCTACCTC…
all	MKDKTRPLKLIAILADGQFHSGEELATQLGISRAAINKHIKTLREWGVDVFSVQGKGYCLANPIQLLDETKIKQQLKNRVTVLPVIDSTNQYLLDRLDELKSGDVCVAEYQSAGRGRRGRKWFSPFGSNLYFSMYWRLEQGMAAAMGLSLVVGIVMAEVLKKLGADGVRVKWPNDLYLNDRKLAGILVEMTGKTGDAAHIVIGIGINLSMSEPETNEVDQSWANLSNVGITIDRNQLVASLAKDLKSALRQFEQQGLAAFLSRWQALDNFINRPVKLLIGDKEIHGIARGINEQGALLLEQDGGIKAYIGGEISLRSA	ATGAAGGACAAGACCAGACCGCTCAAGCTTATCGCTATCCTTGCTGATGGACAGTTCCACTCTGGTGAGGAACTTGCTACTCAGCTCGGAATTTCTAGGGCCGCTATCAACAAGCACATCAAGACTCTCCGTGAGTGGGGAGTTGATGTGTTCTCTGTTCAAGGTAAGGGGTACTGCCTCGCTAACCCTATCCAACTTCTCGACGAGACTAAGATCAAGCAGCAGCTCAAGAACAGGGTGACAGTTCTCCCTGTGATCGACTCTACTAACCAGTACCTCCTCGATAGGCTCGACGAGCTTAAGTCTGGTGATGTTTGTGTGGCCGAGTACCAGTCTGCTGGAAGAGGACGTAGAGGTAGGAAGTGGTTTAGCCCGTTCGGAAGCAACCTCTACTTCAGC…
