# Supplementary figures and images for: AirID, a novel proximity biotinylation enzyme, for analysis of protein–protein interactions
Source: eLife journal article supplement (doi:10.7554/elife.54983), 2020-05-11

A

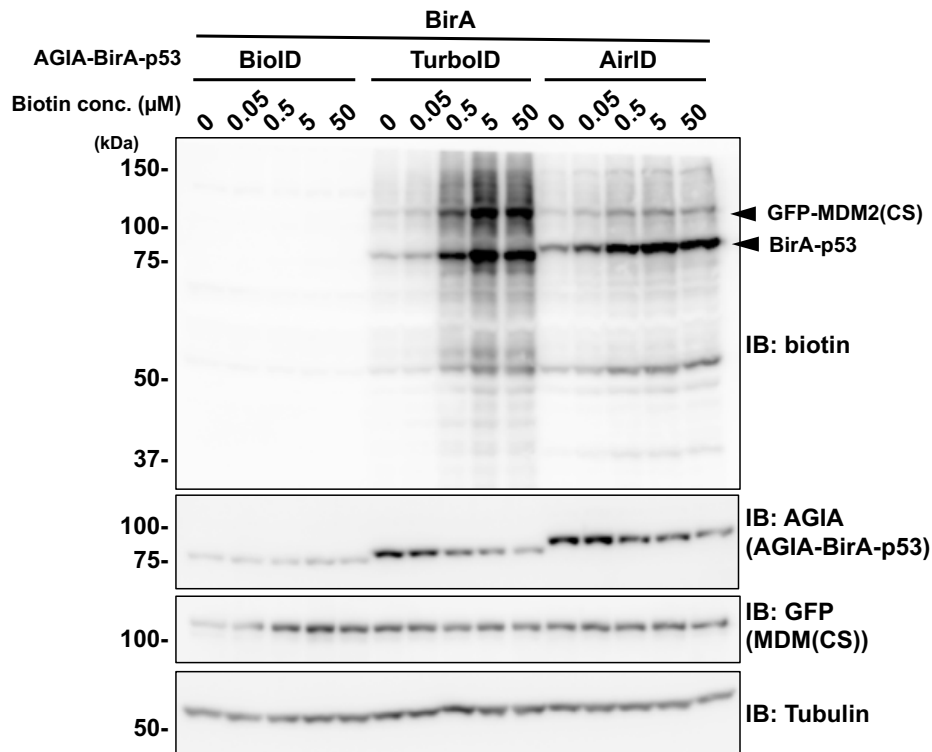

B

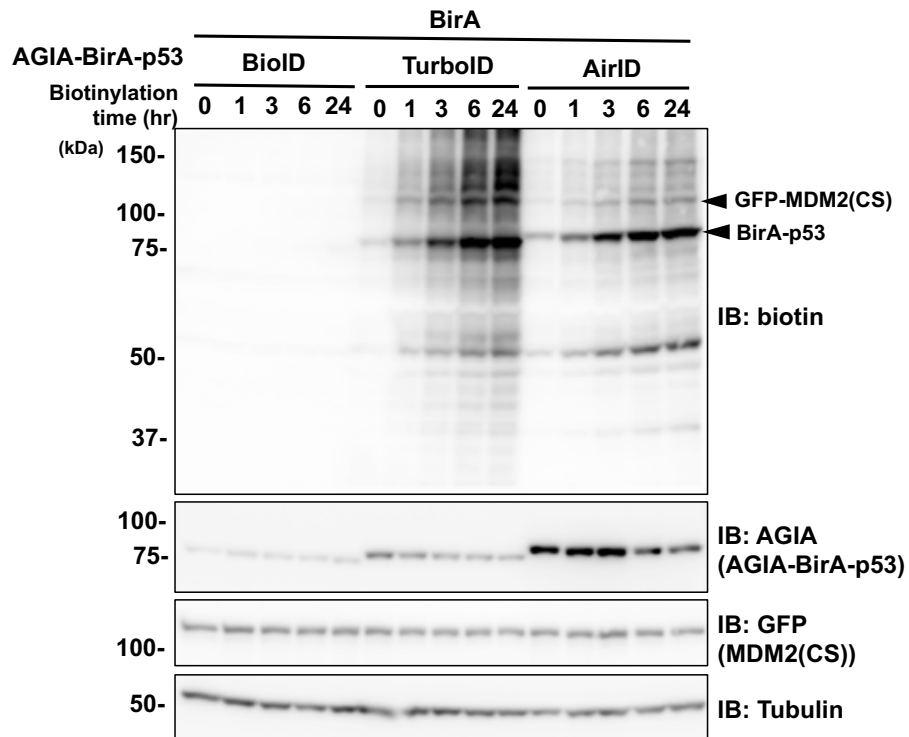

Supplement: supp [file elife-54983-supp-v1.zip]

# **Pull-down: Streptavidin**

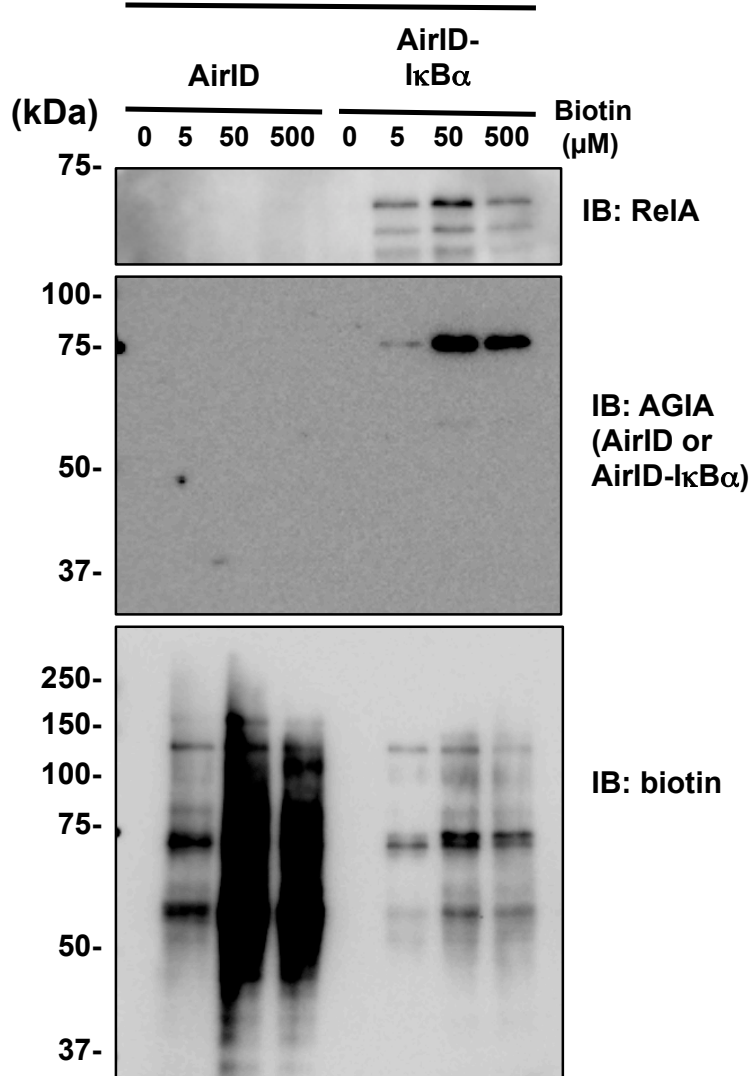

# **input**

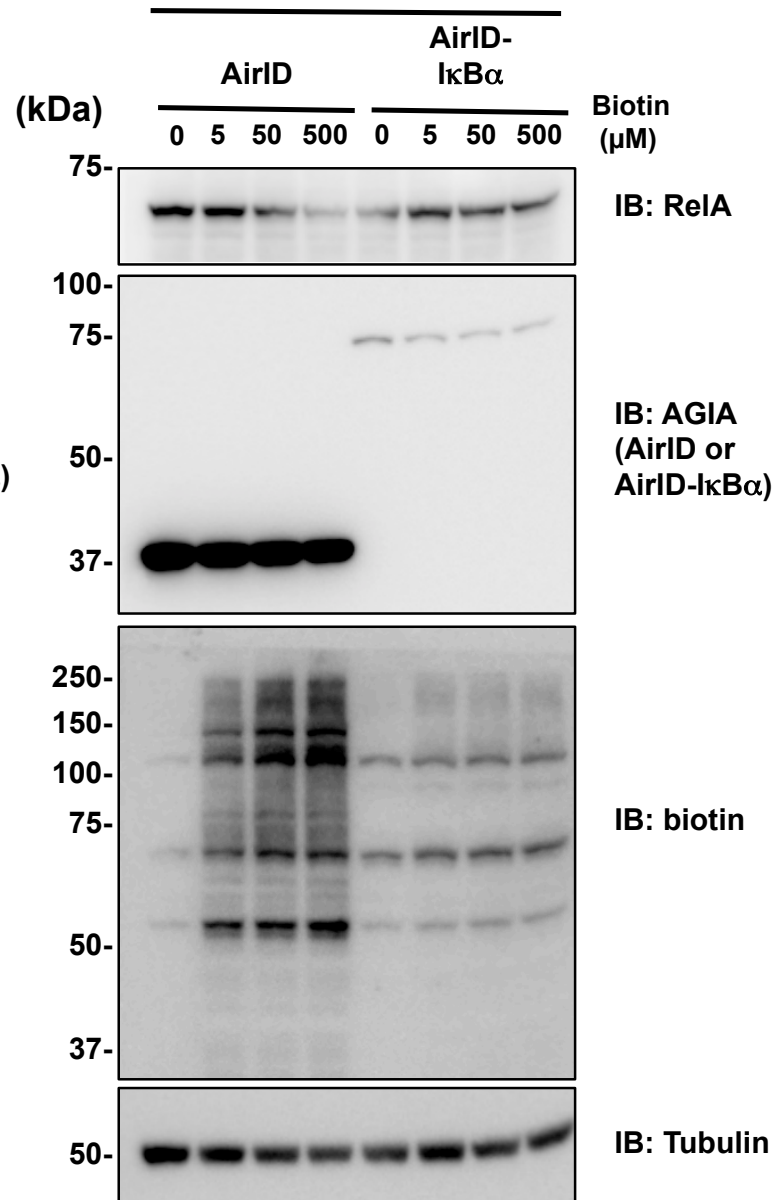

Supplement: supp [file elife-54983-supp-v1.zip]

Relative cell viability

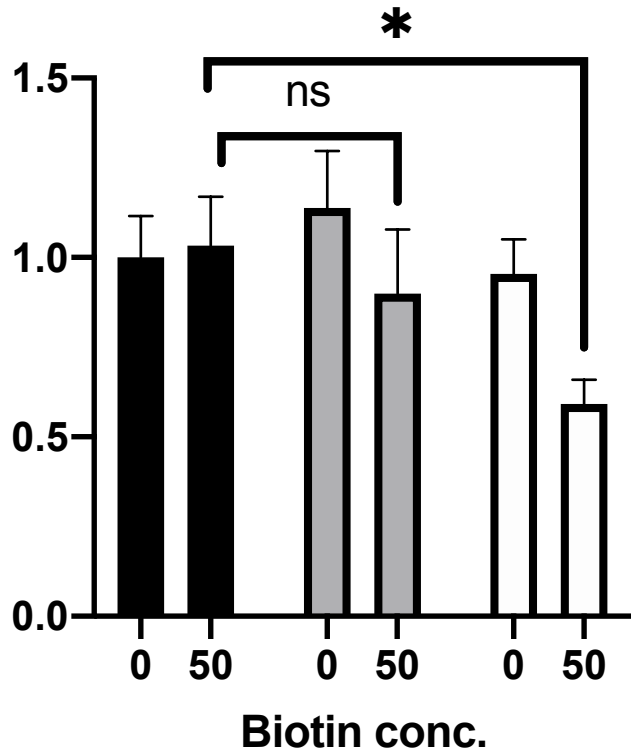

- Mock
- AirID
- TurboID

Supplement: supp [file elife-54983-supp-v1.zip]

A

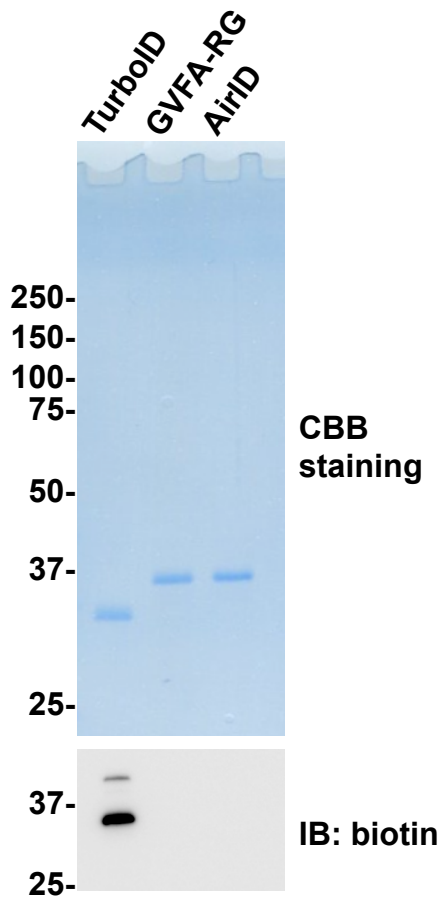

B

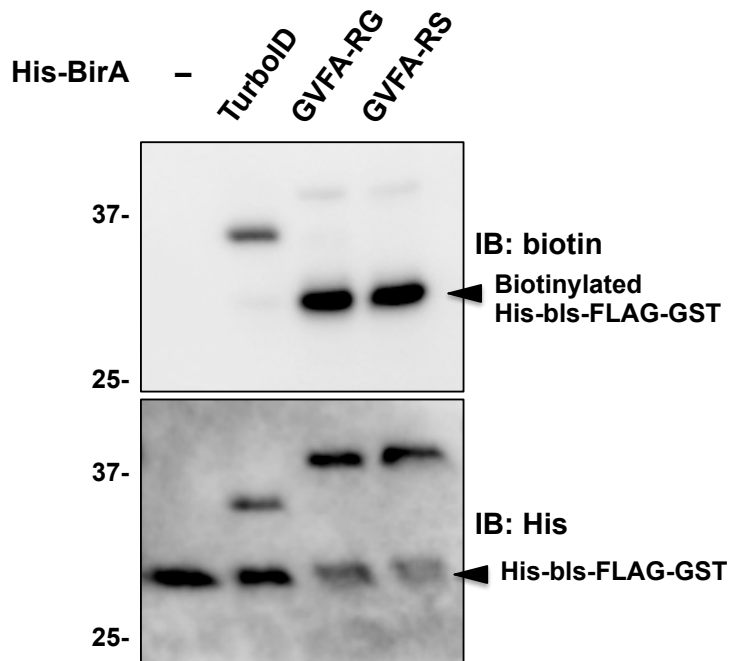

Supplement: supp [file elife-54983-supp-v1.zip]

FT-AirID

DHFR

FD

(kDa)

50-

37-

25-

◀ FT-AirID

◀ FD

◀ DHFR

IB: biotin

75-

50-

37-

25-

◀ FT-AirID

◀ FD

◀ DHFR

IB: AGIA

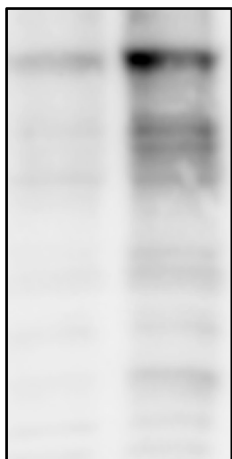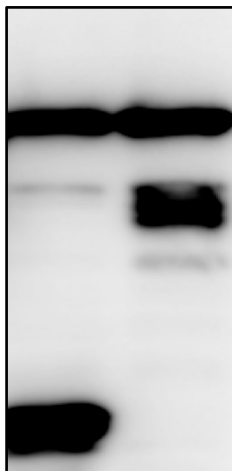

Supplement: supp [file elife-54983-supp-v1.zip]
